# Supplementary material for: Evolution of DNA Methylation Across Ecdysozoa
Source: PubMed Central journal article supplement (PMC8821070; doi:10.1007/s00239-021-10042-0), 2022-01-28

# Drosophila\_melanogaster

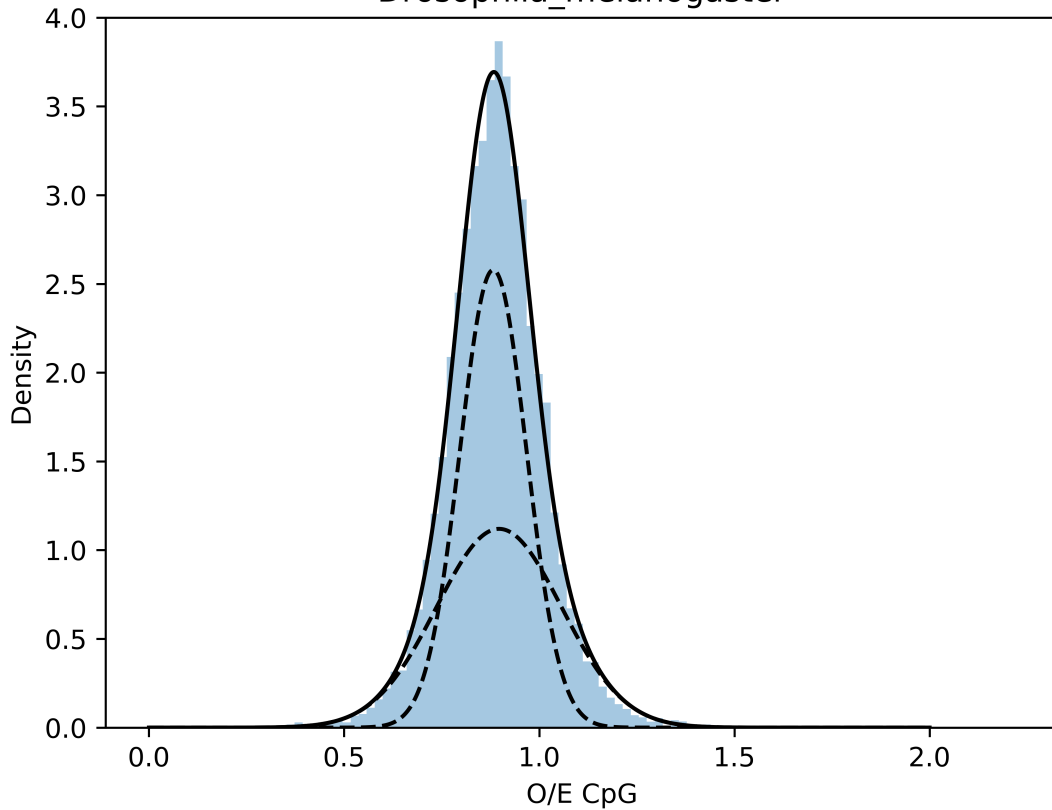

# Aedes\_aegypti

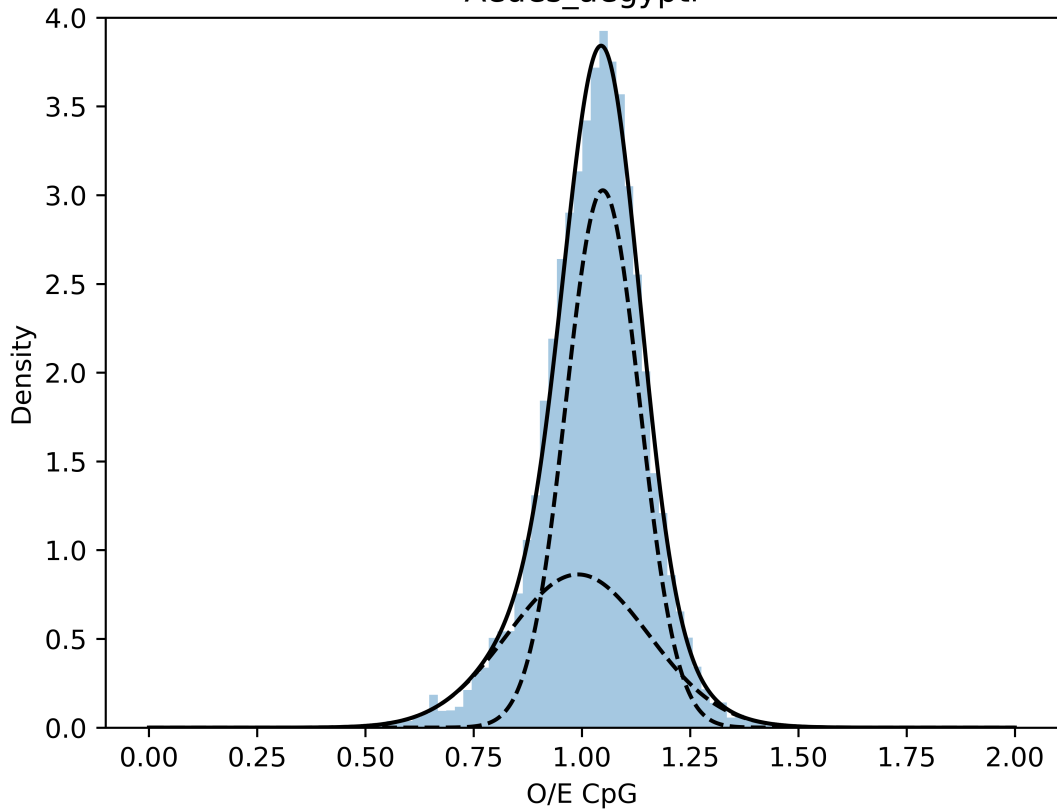

# Anopheles\_gambiae

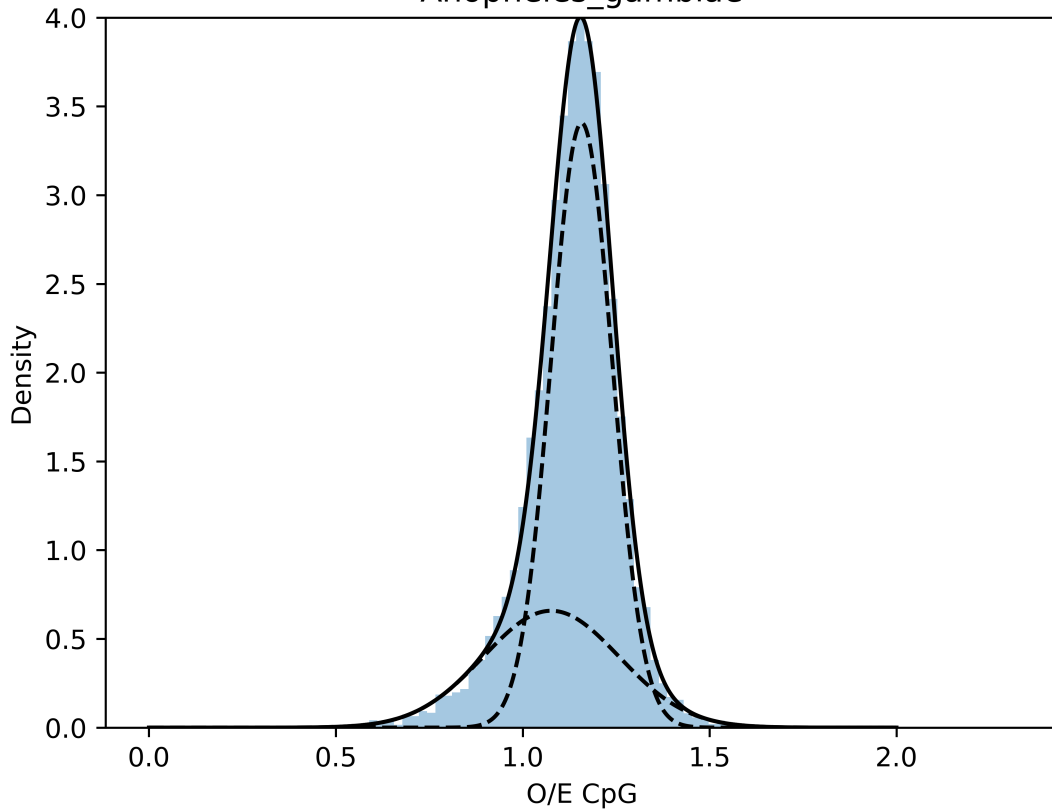

# Ctenocephalides\_felis

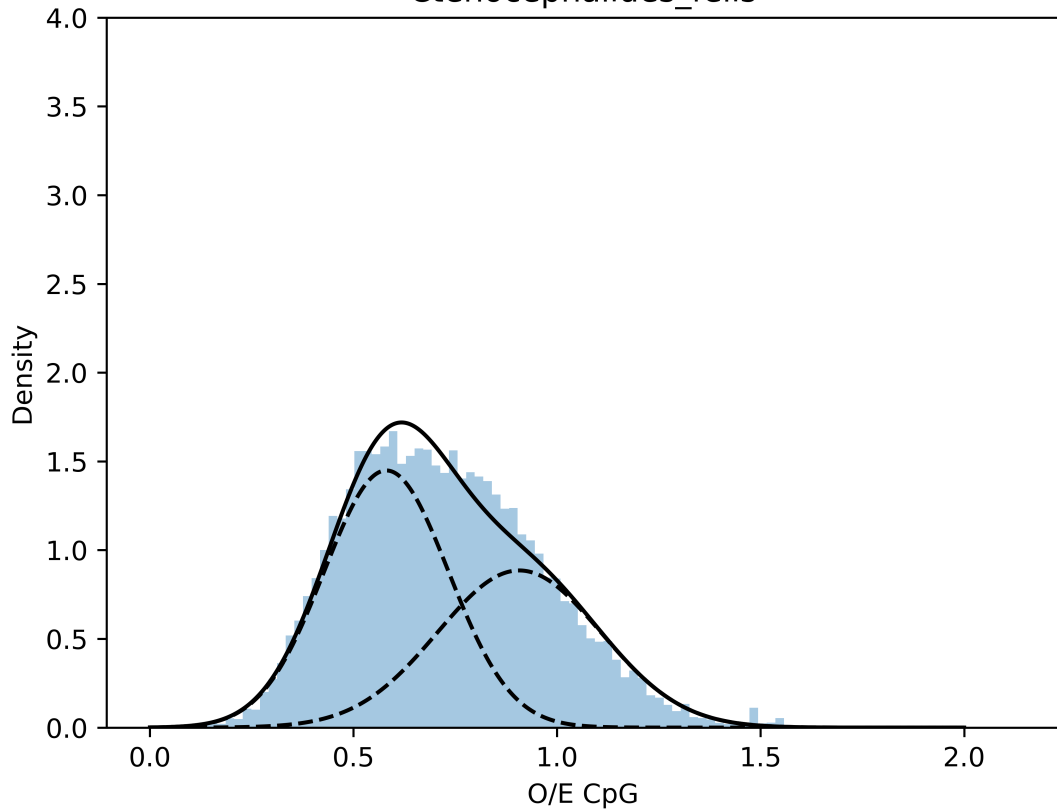

# Bombyx\_mori

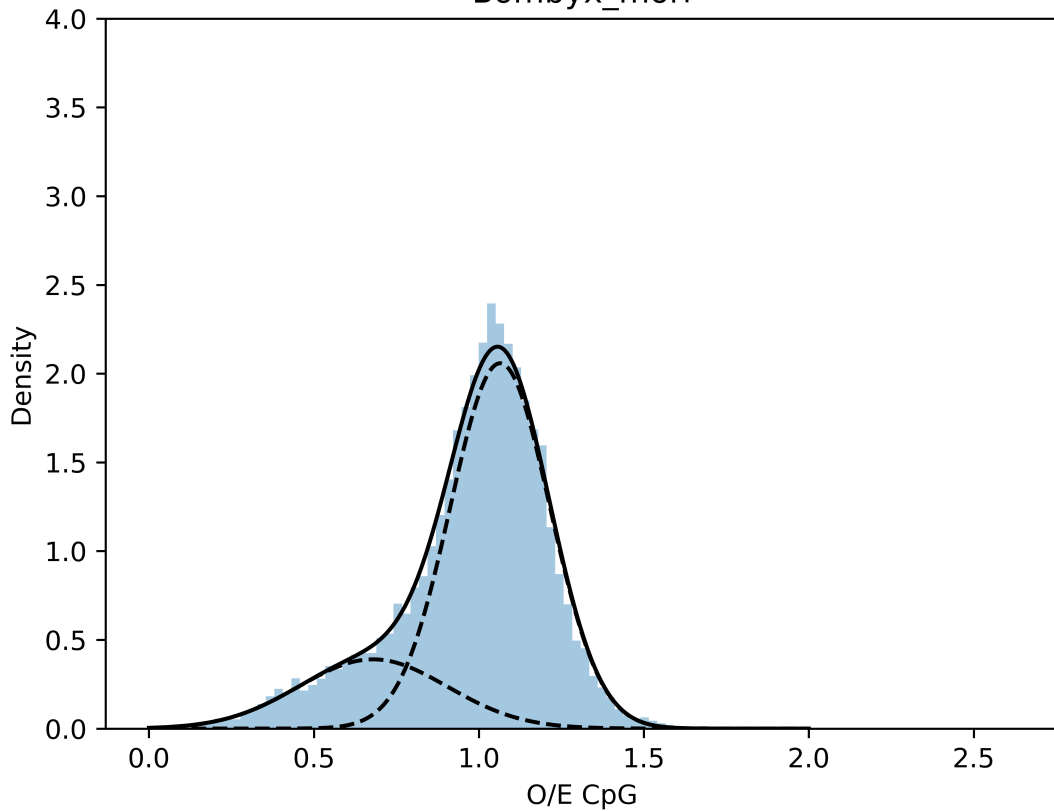

# Danaus\_plexippus

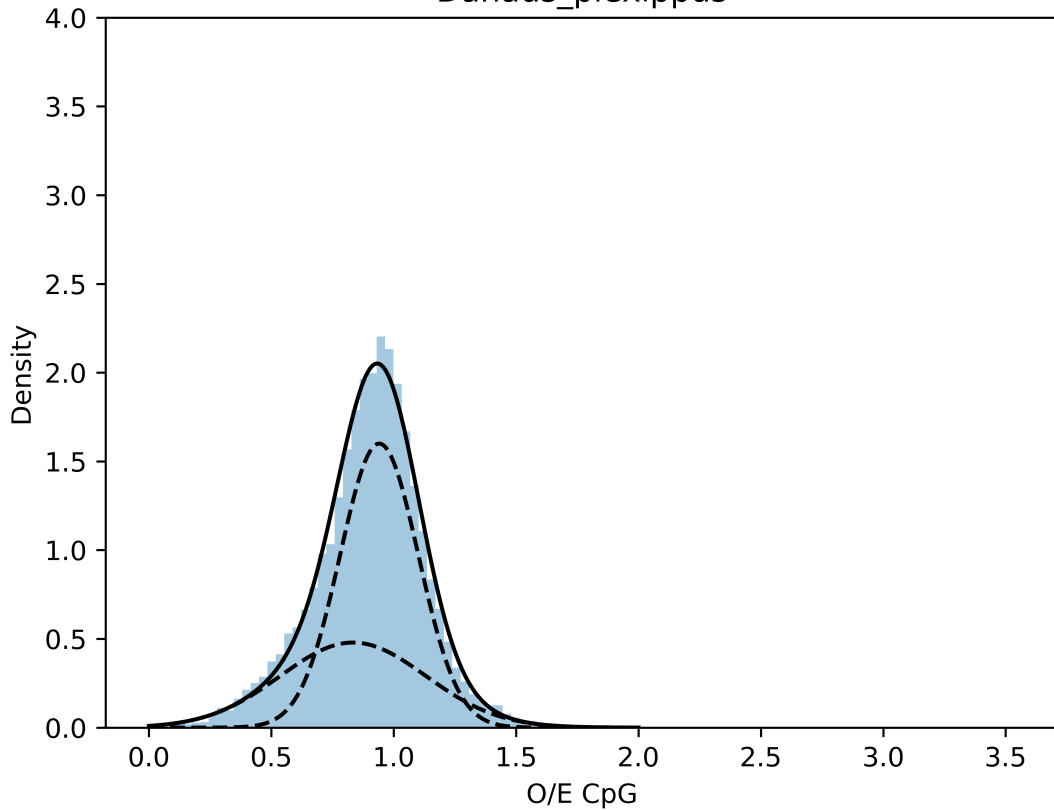

# Operophtera\_brumata

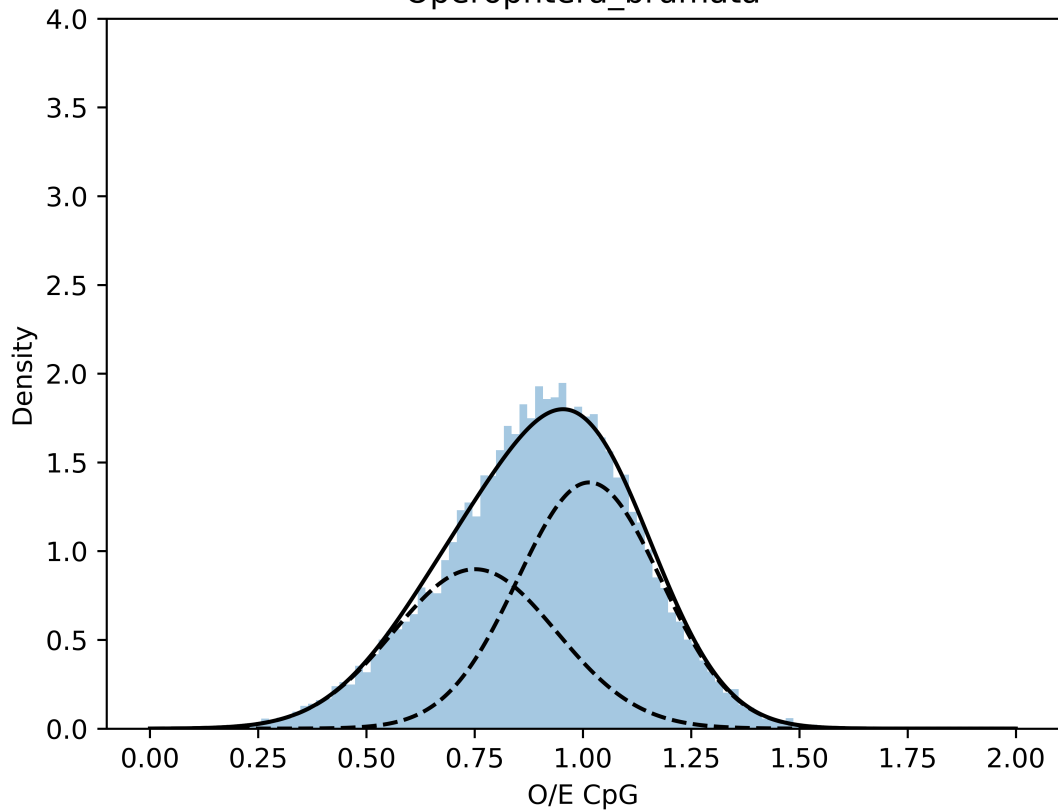

# Heliconius\_melpomene

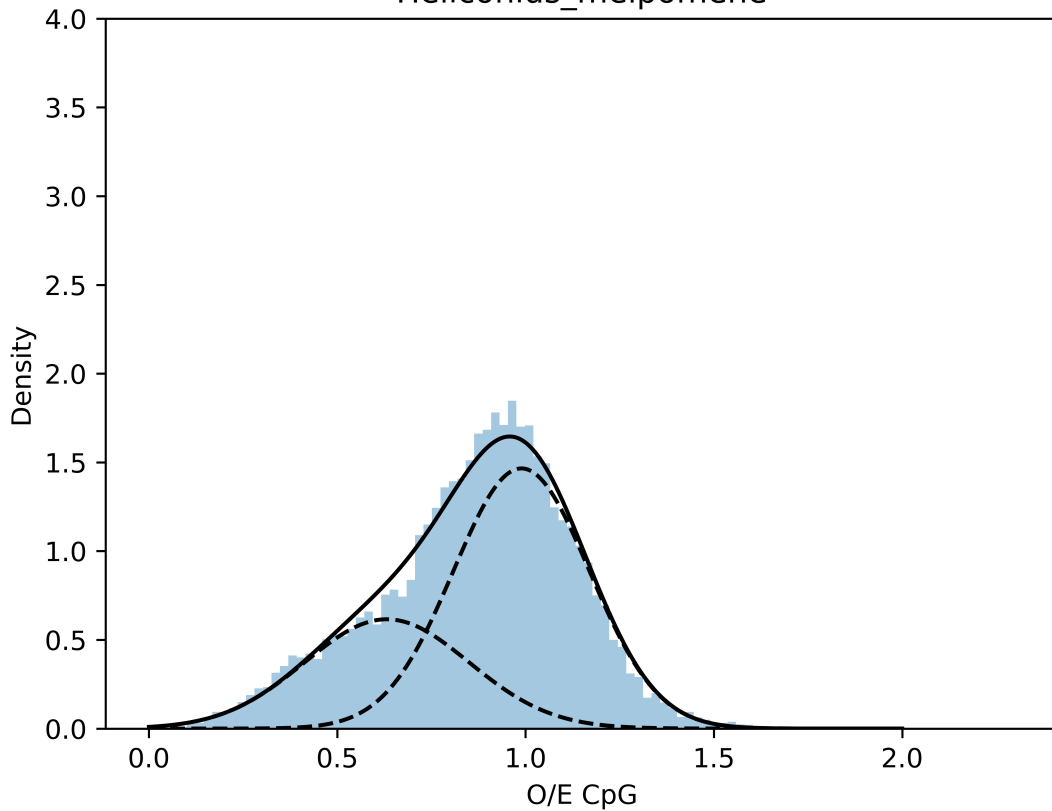



# Melitaea\_cinxia

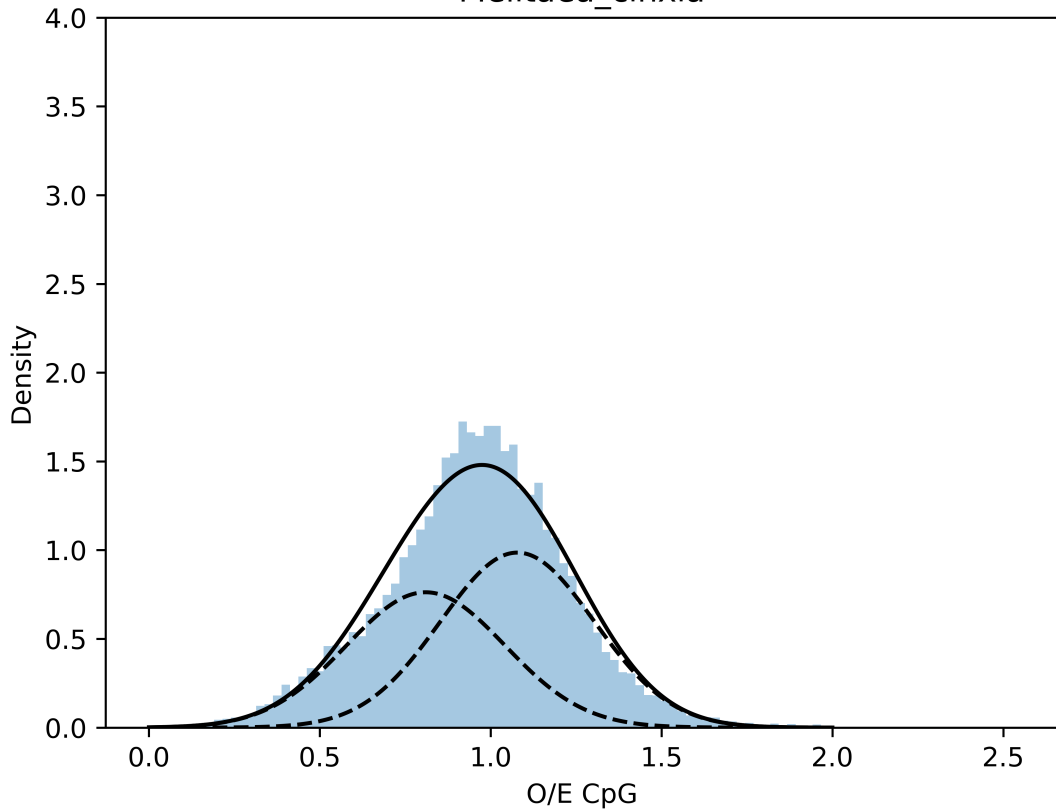

# Papilio\_xuthus

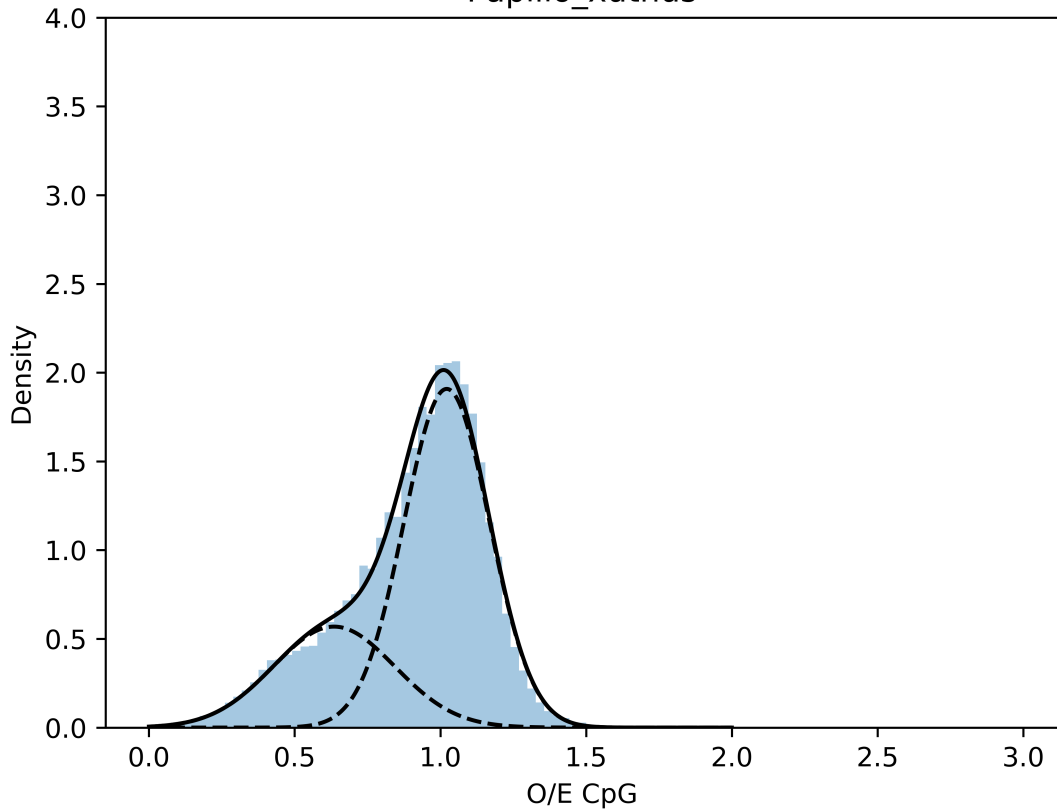

# Plutella\_xylostella

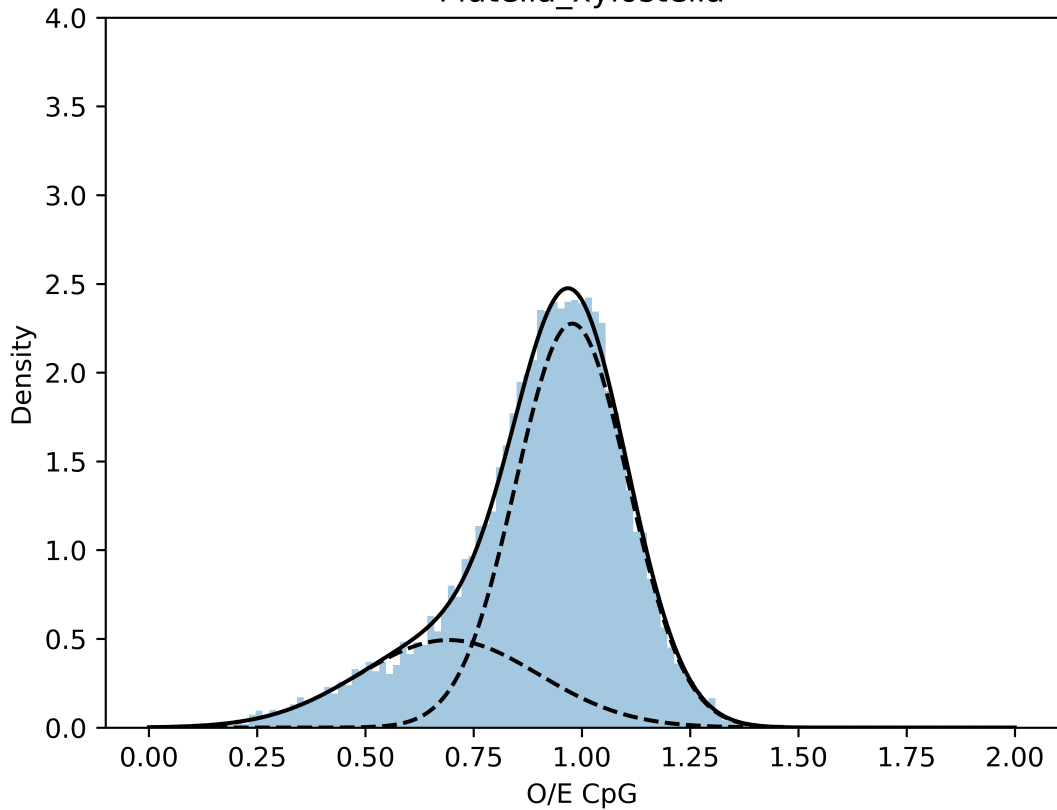

# Limnephilus\_lunatus

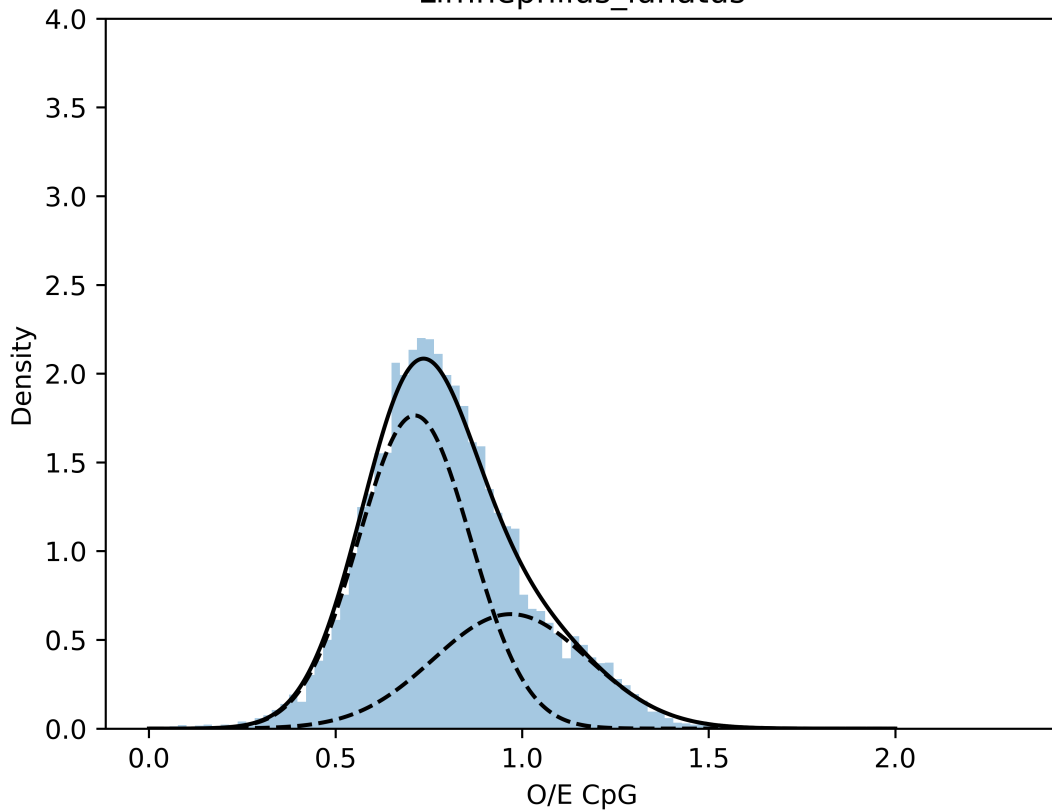

# Agrilus\_planipennis

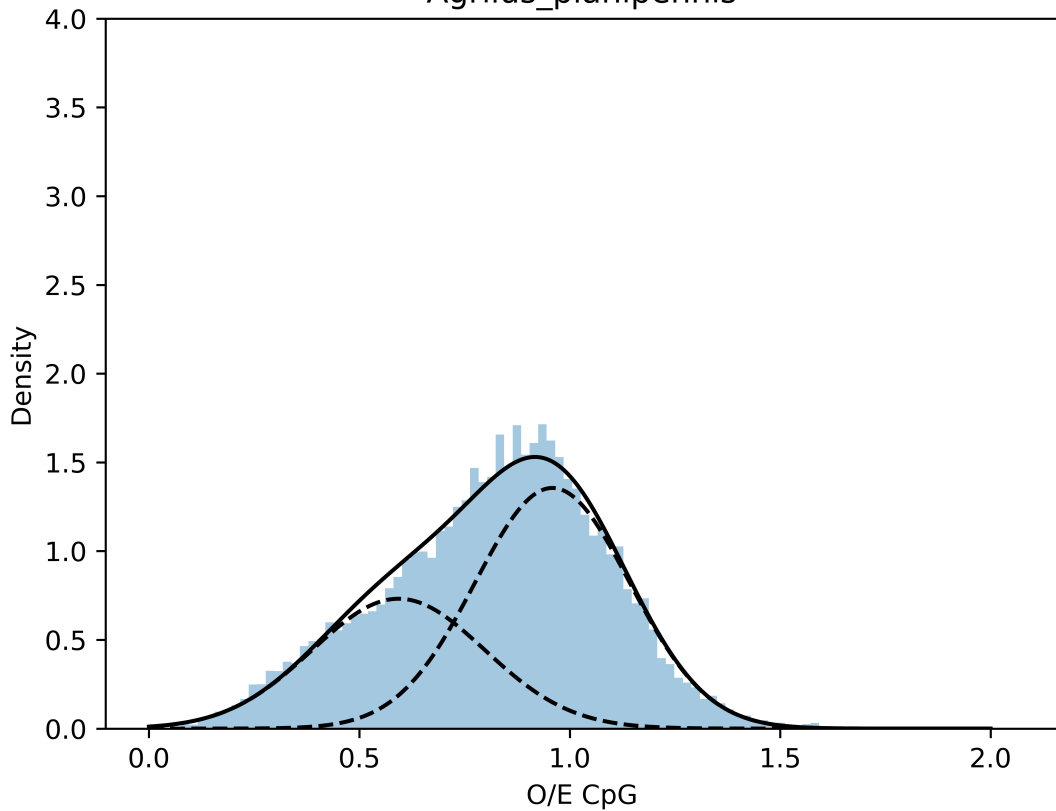

# Nicrophorus\_vespilloides

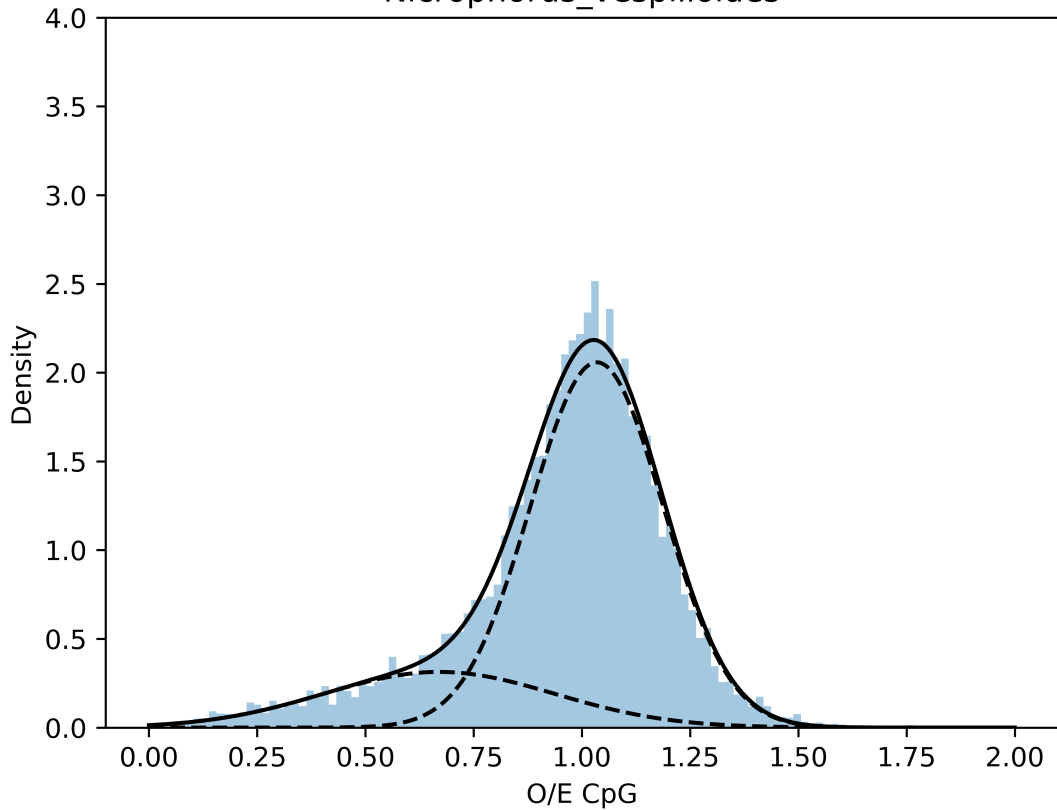

# Onthophagus\_taurus

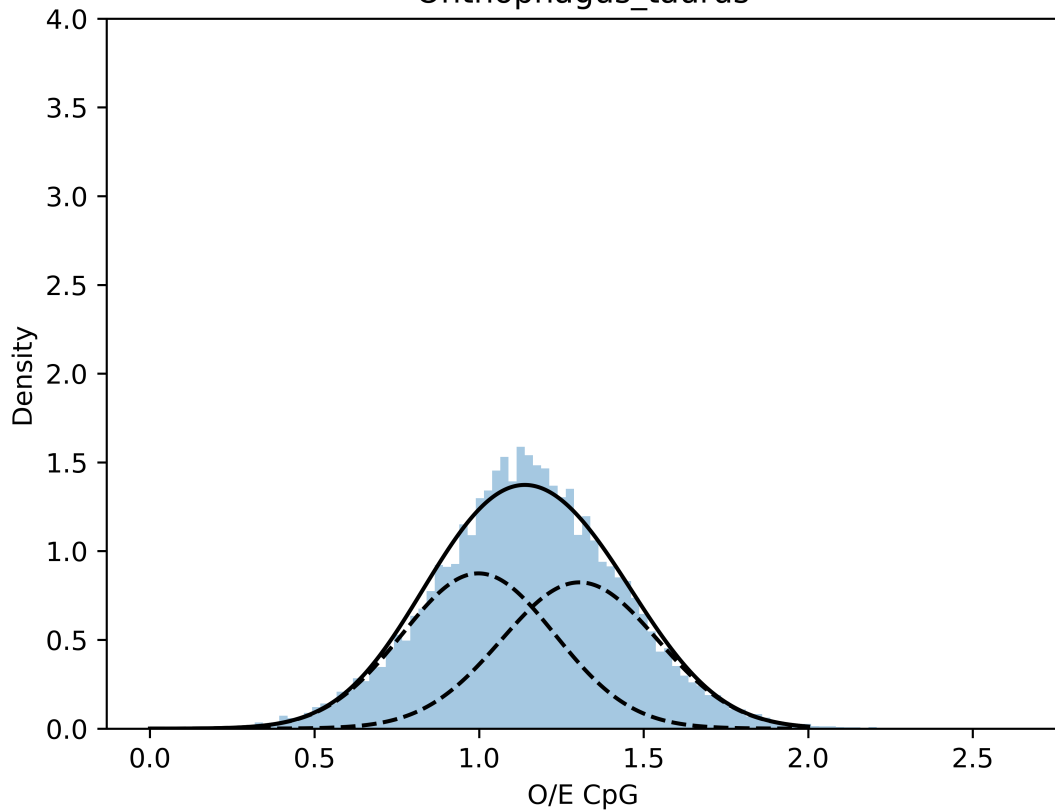

# Oryctes\_borbonicus

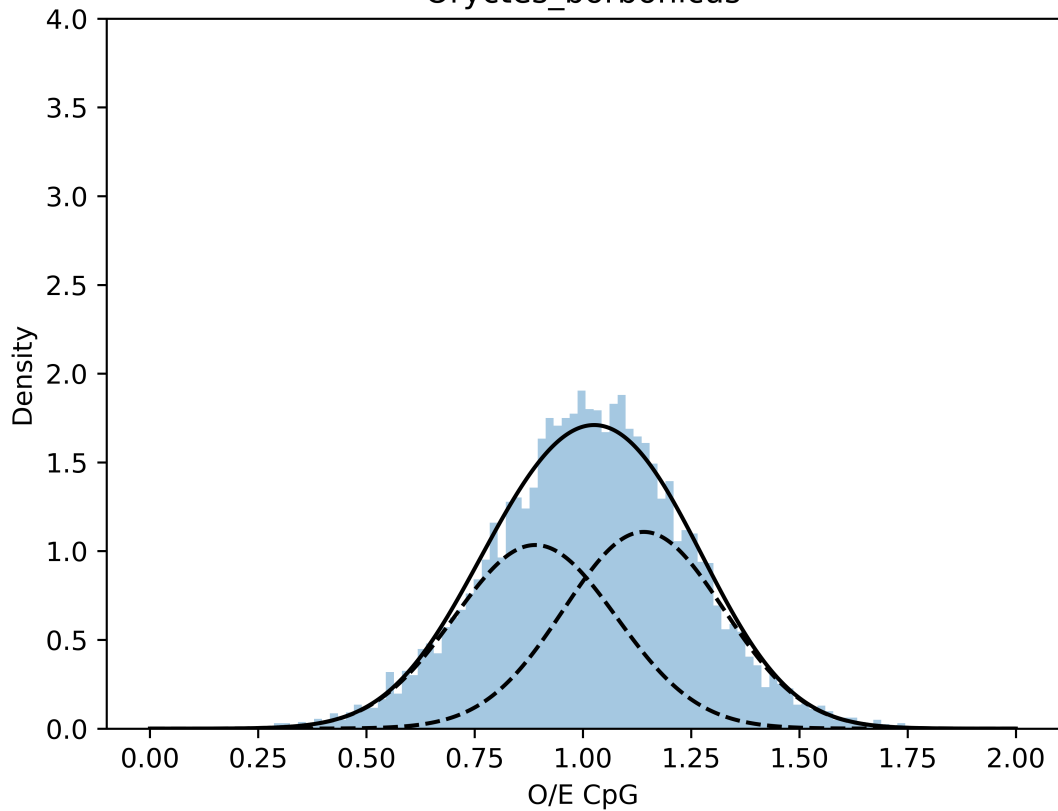



# Anoplophora\_glabripennis

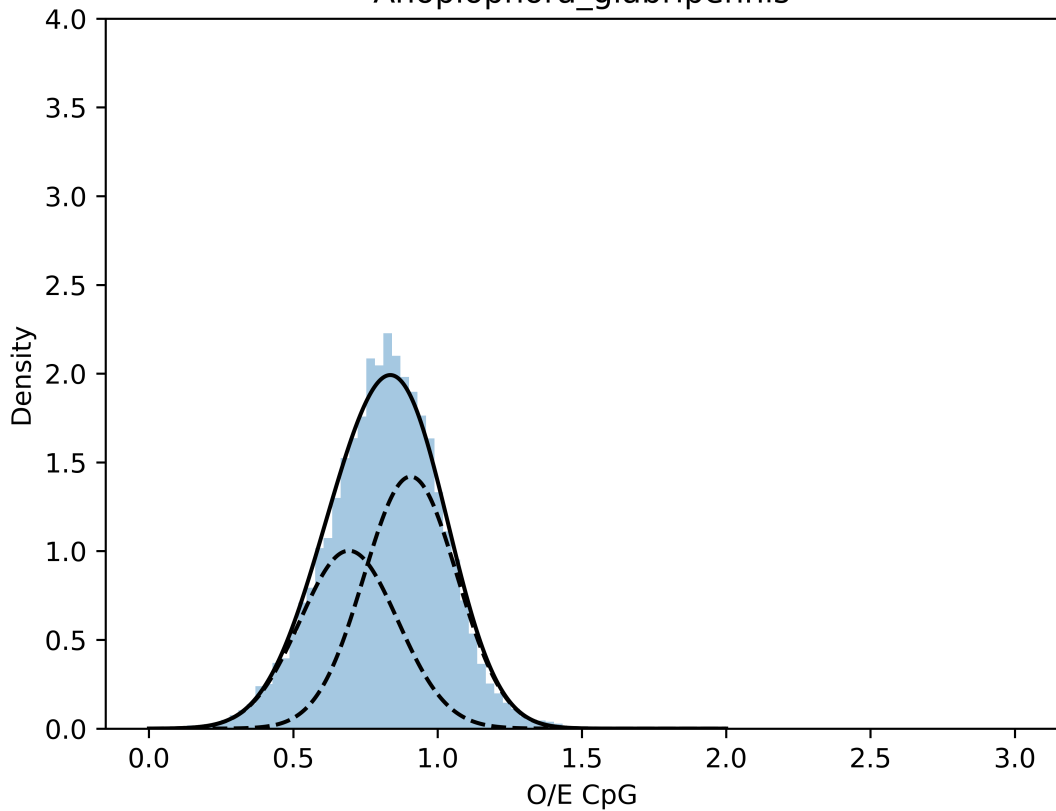

# Leptinotarsa\_decemlineata

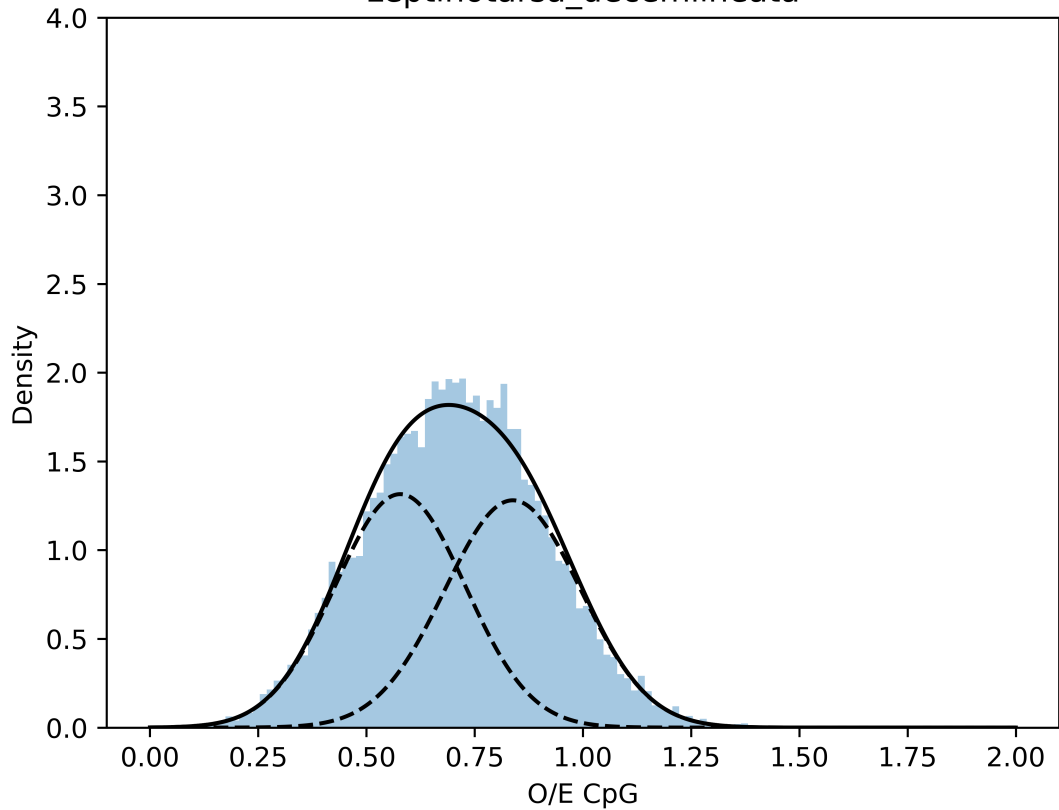

# Diabrotica\_virgifera

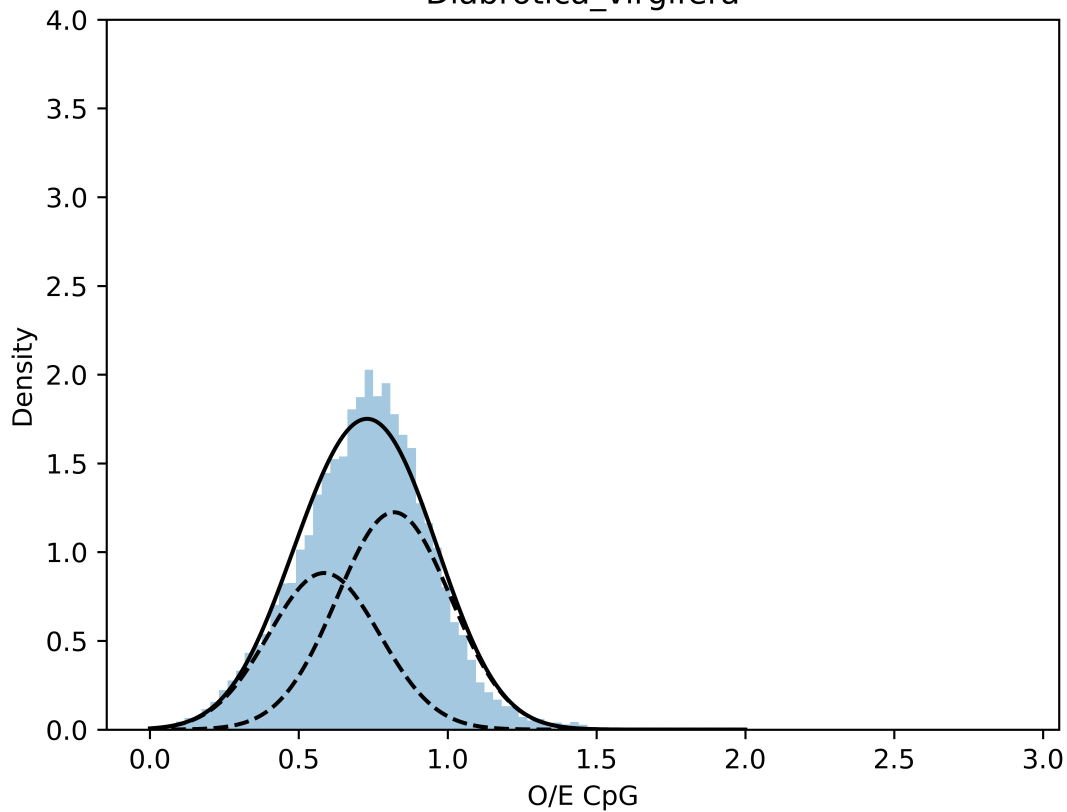

# Dendroctonus\_ponderosae

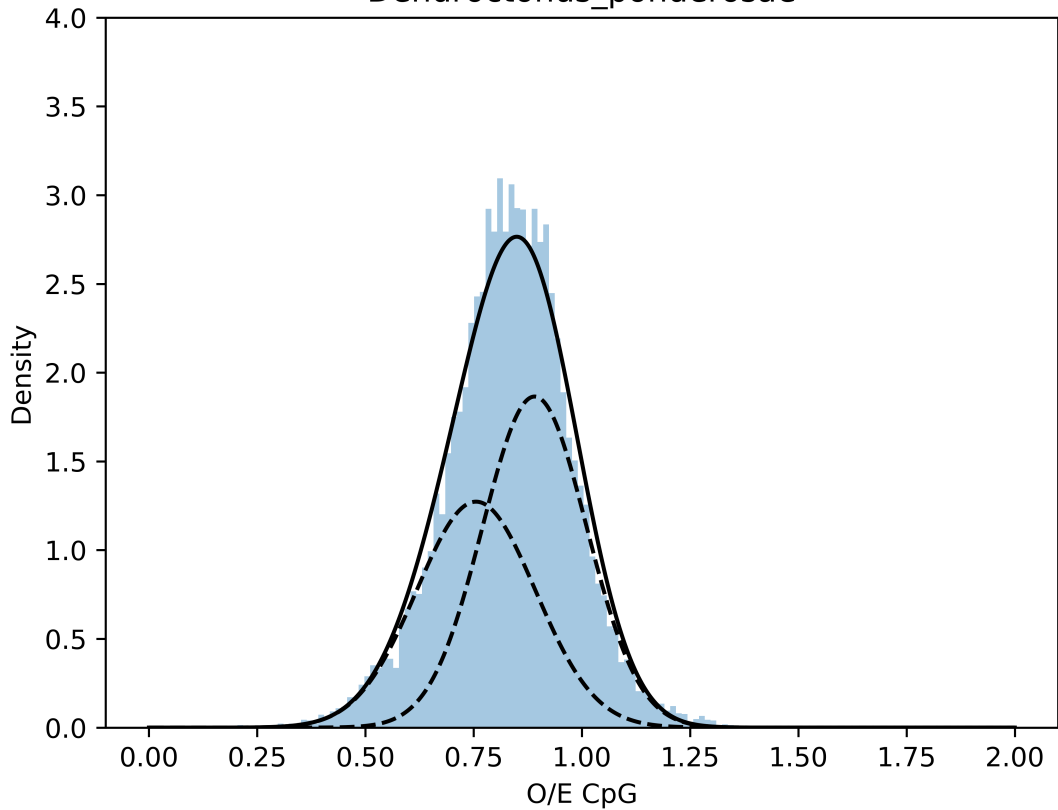

# Aethina\_tumida

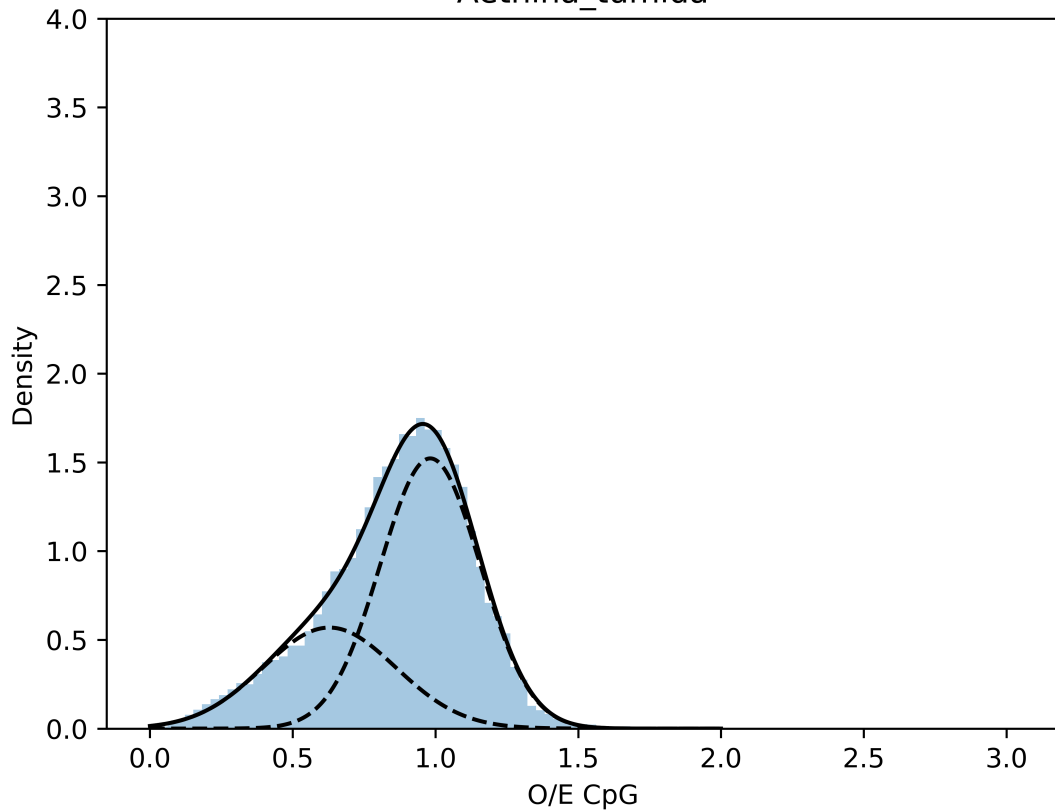

# Tribolium\_castaneum

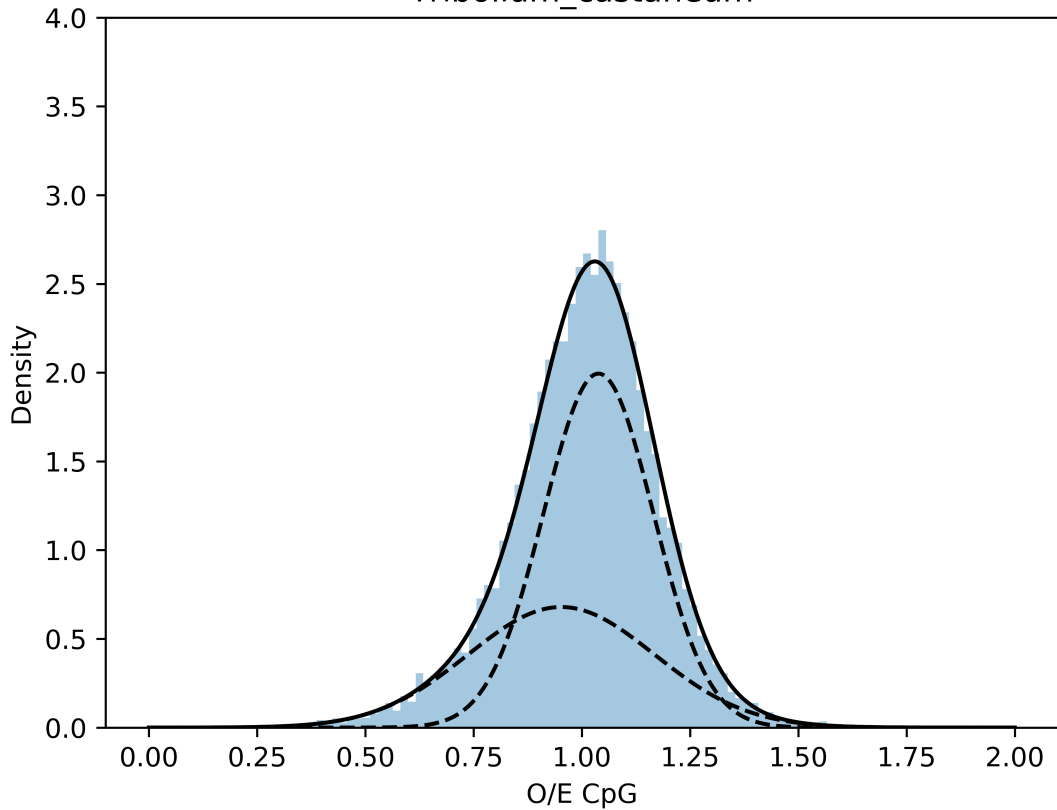

# Apis\_mellifera

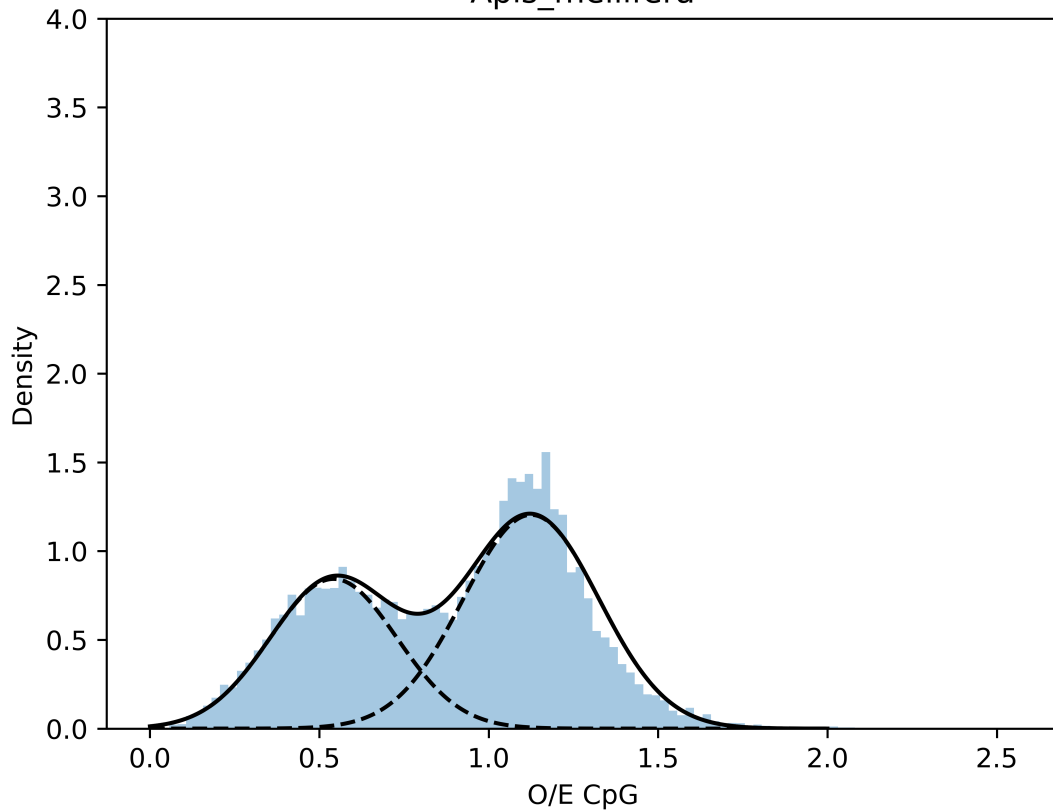

# Bombus\_impatiens

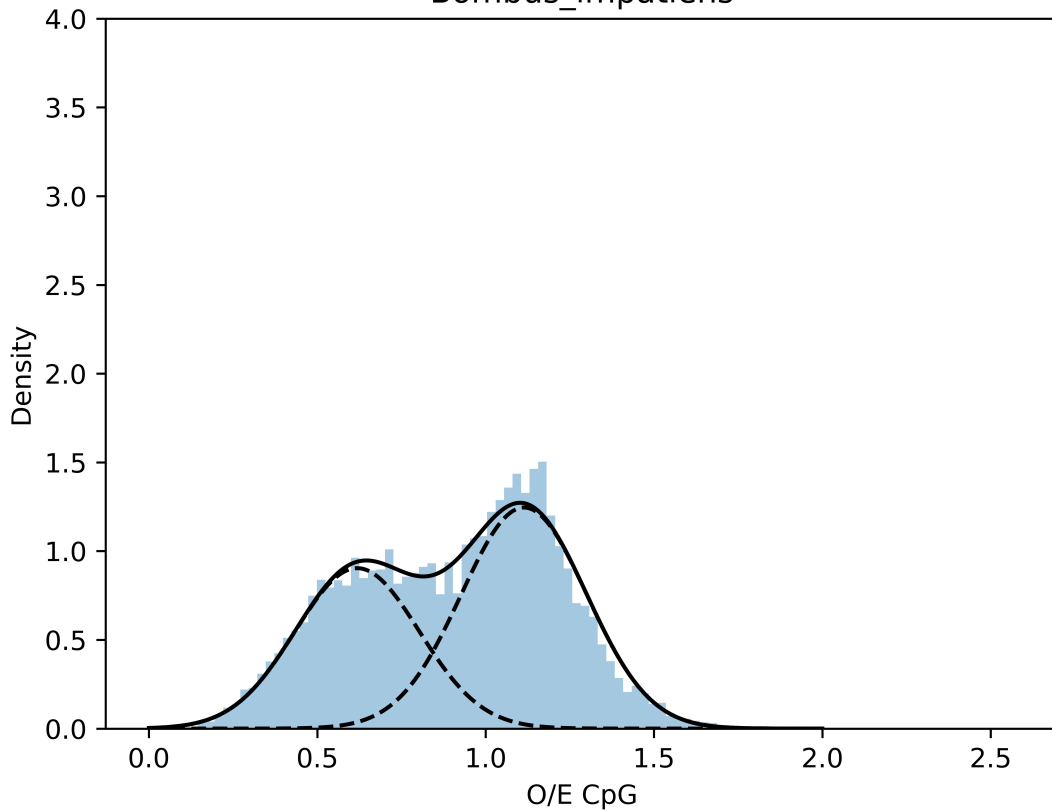



# Atta\_cephalotes

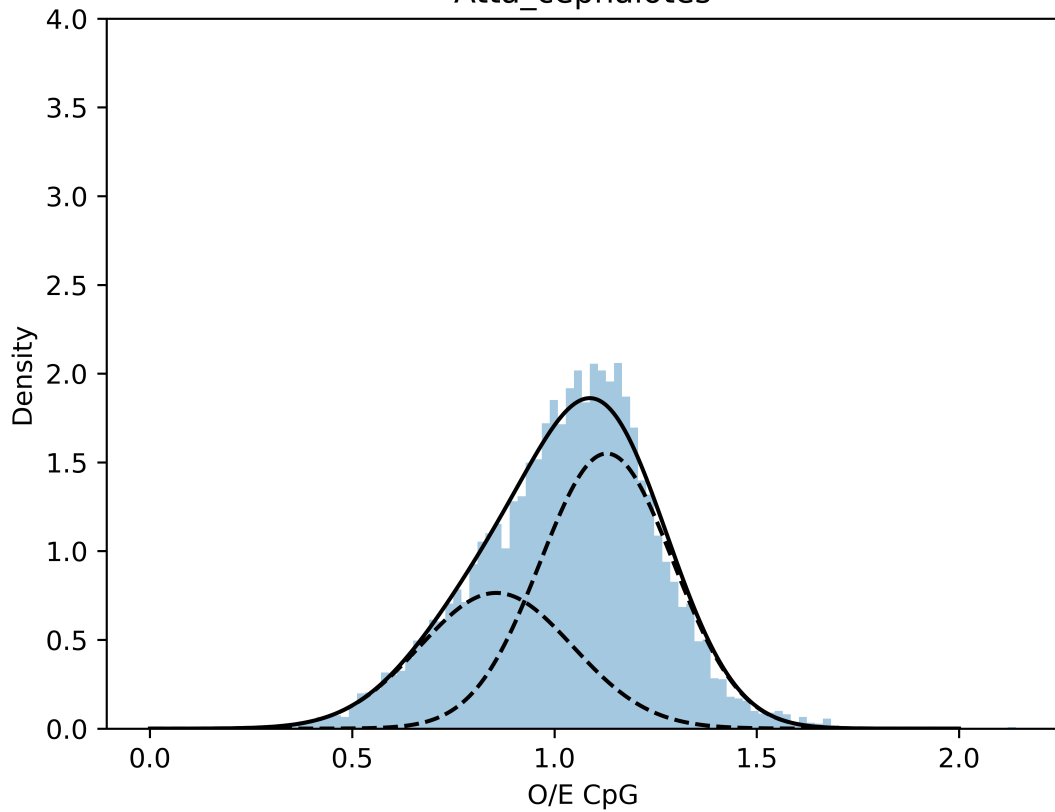

# Acromyrmex\_echinatior

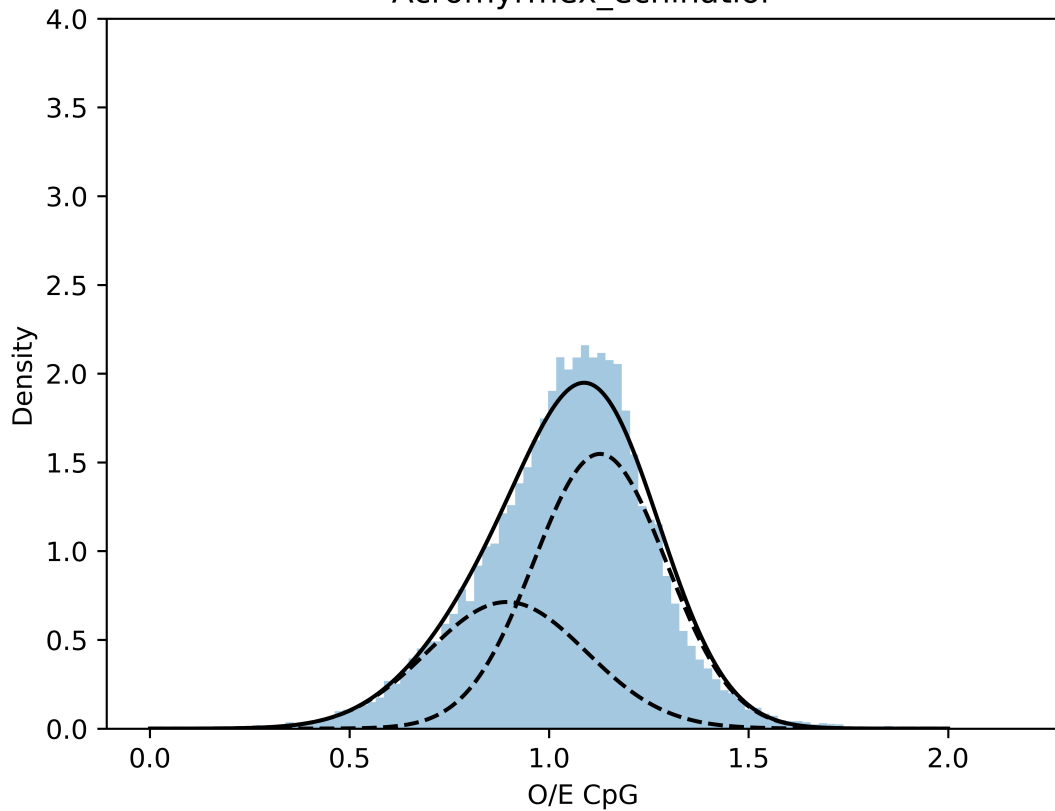

# Harpegnathos\_saltator

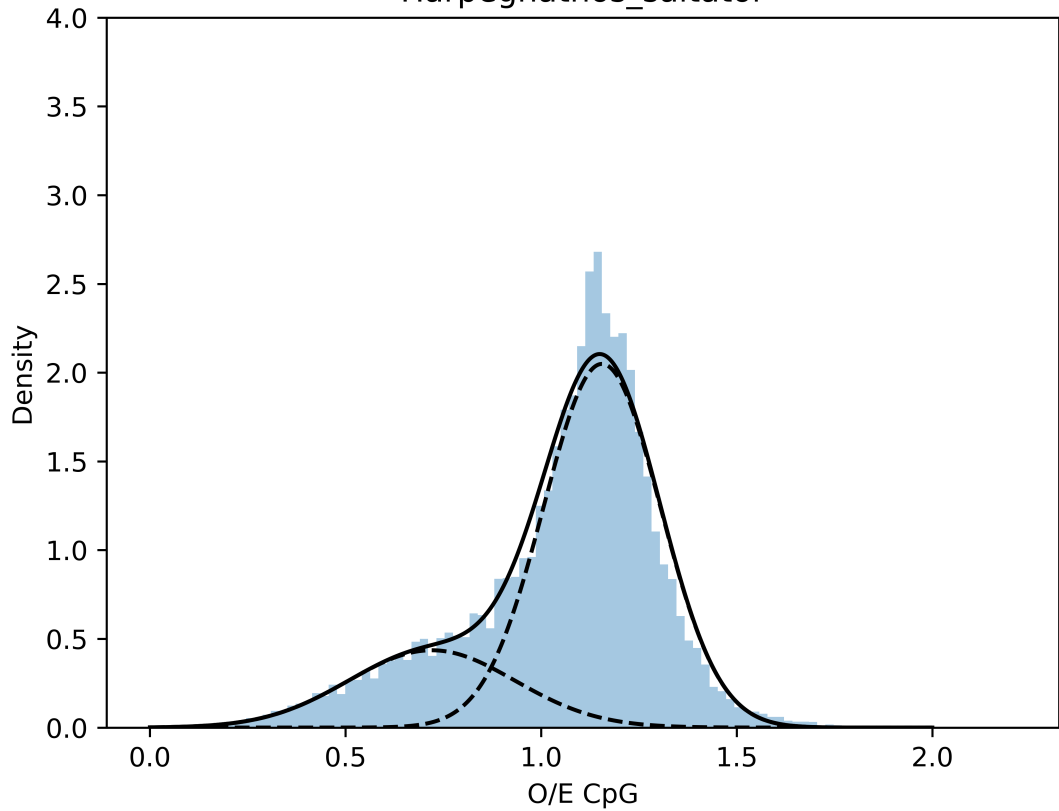

# Solenopsis\_invicta

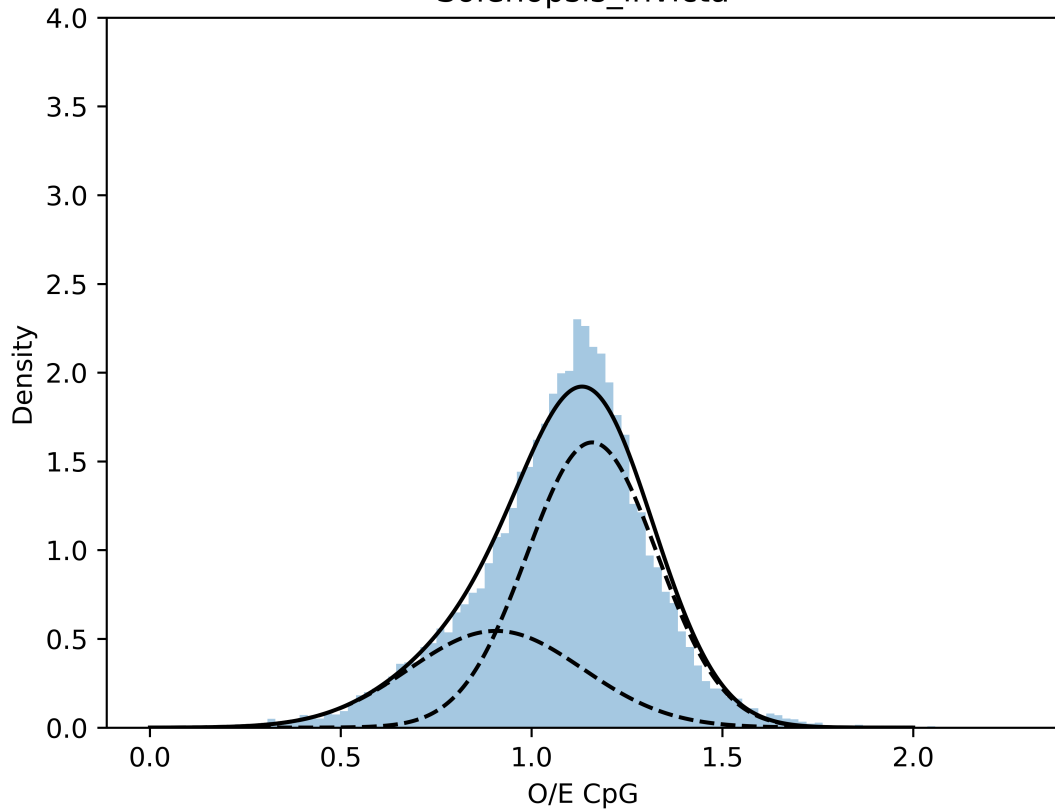

# Polistes\_dominula

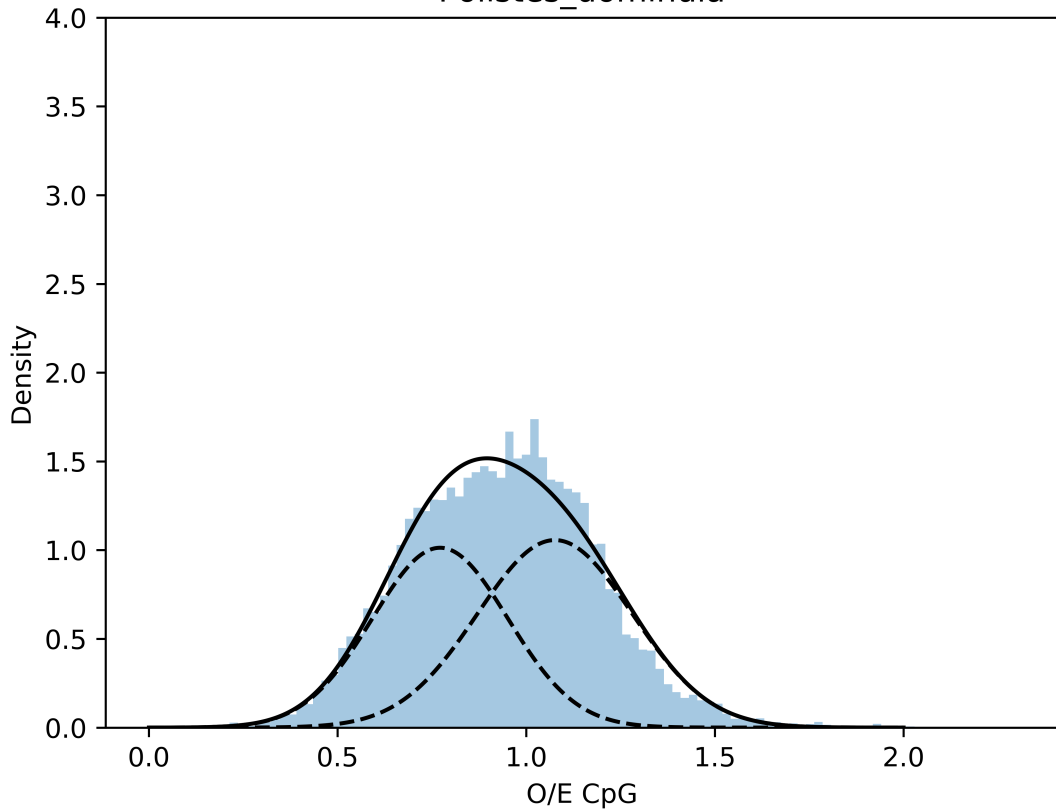

# Polistes\_canadensis

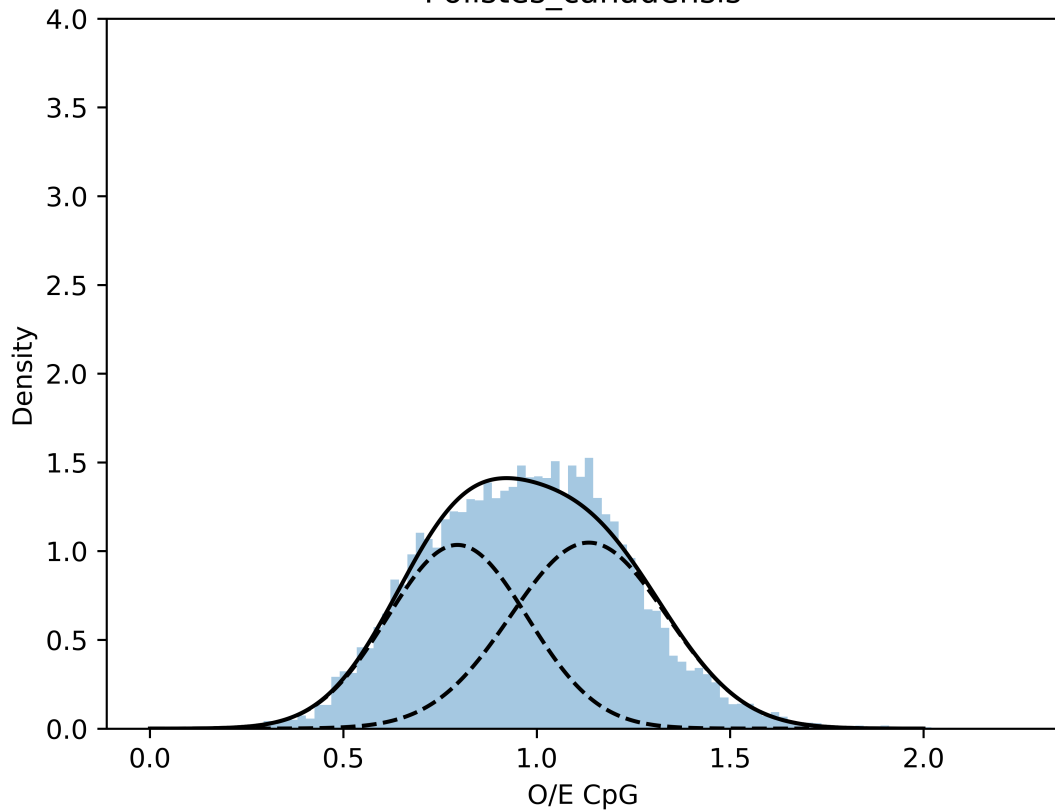

# Nasionia\_vitripennis

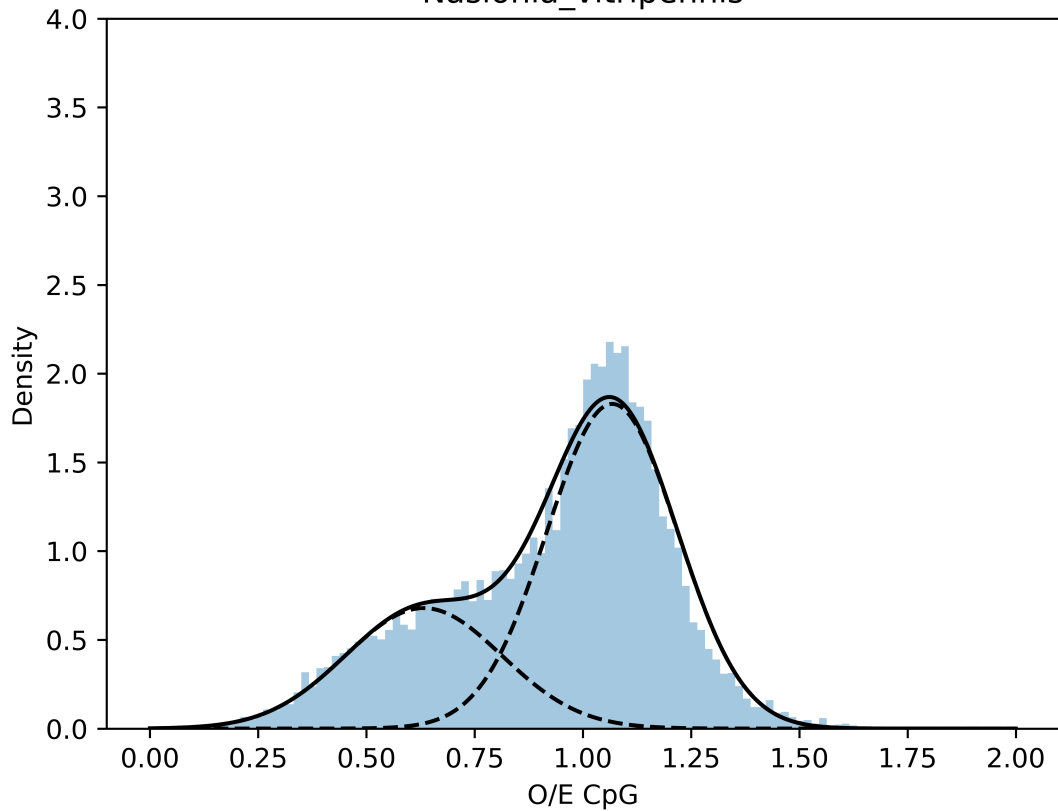

# Cephus\_cinctu

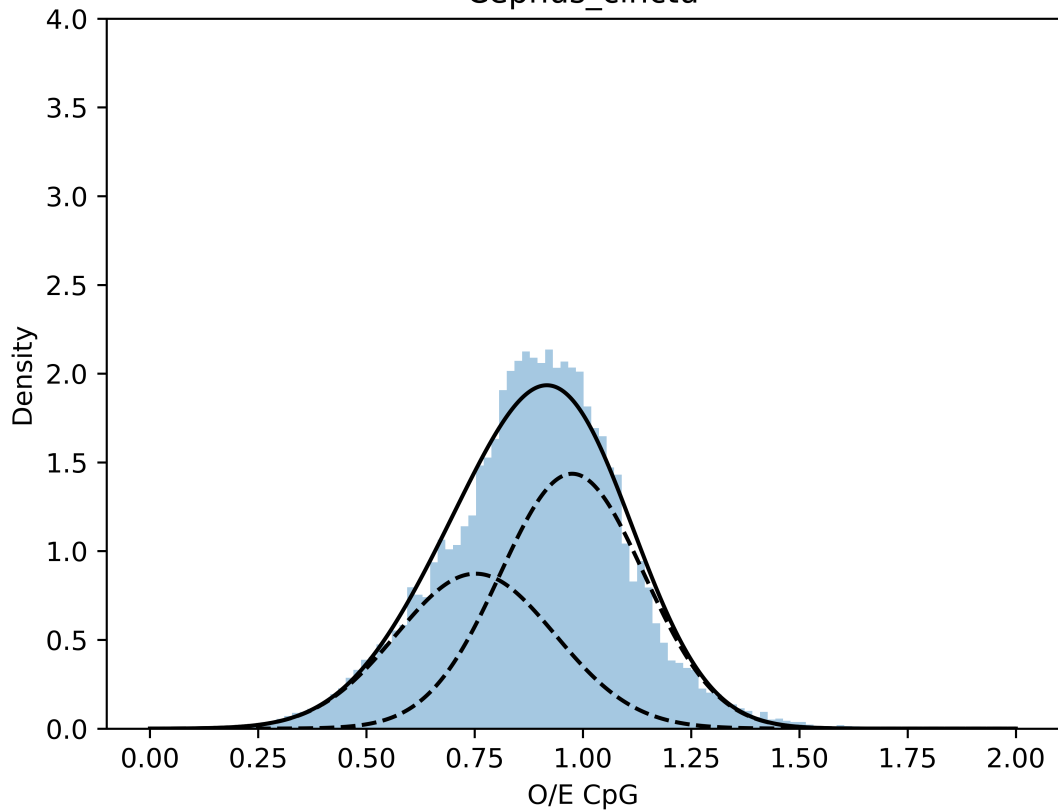



# Orussus\_abietinus

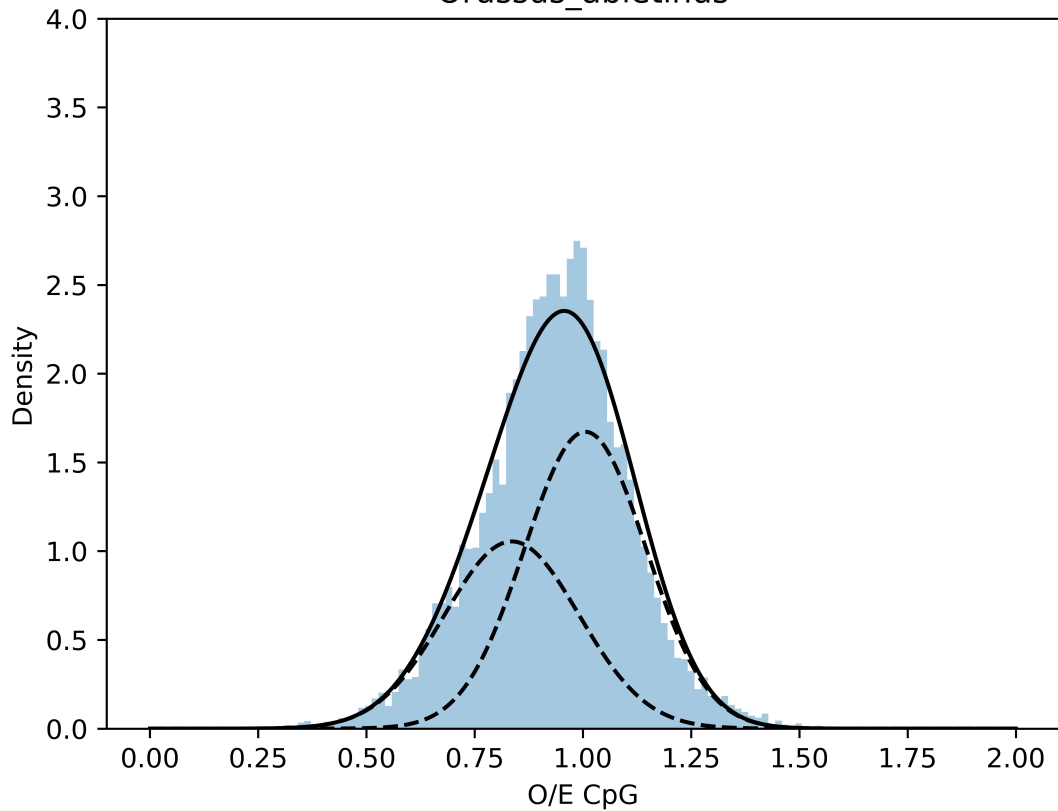

# Athalia\_rosae

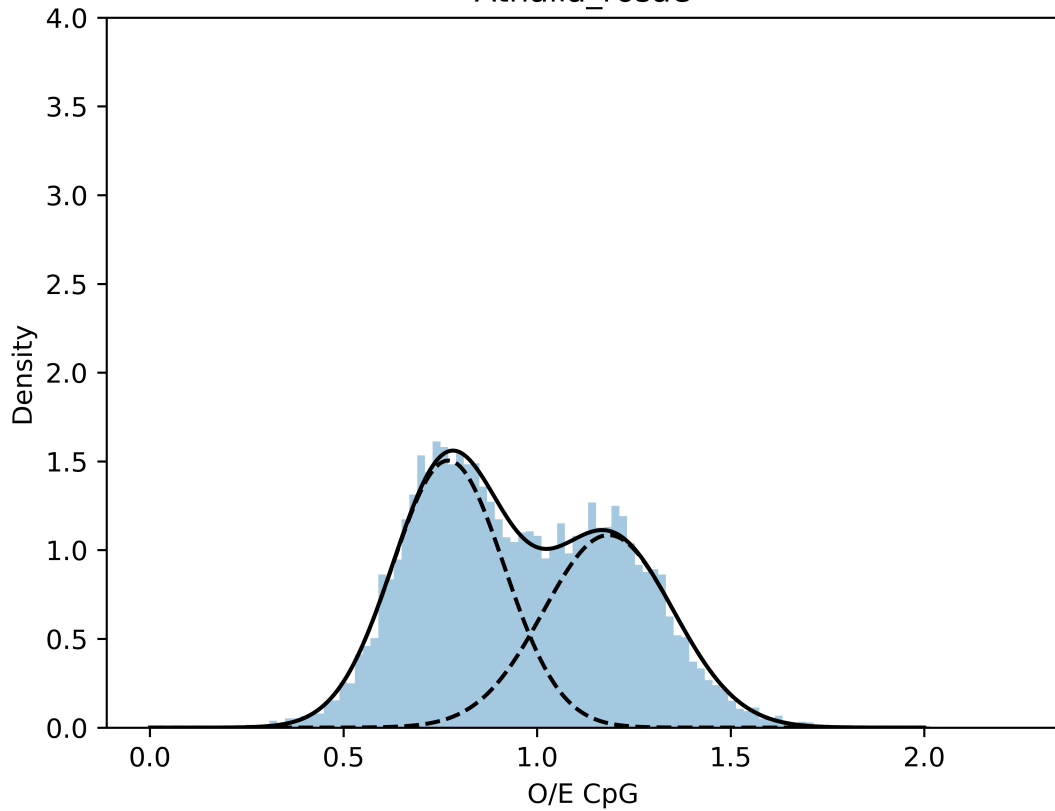

# Pediculus\_humanus

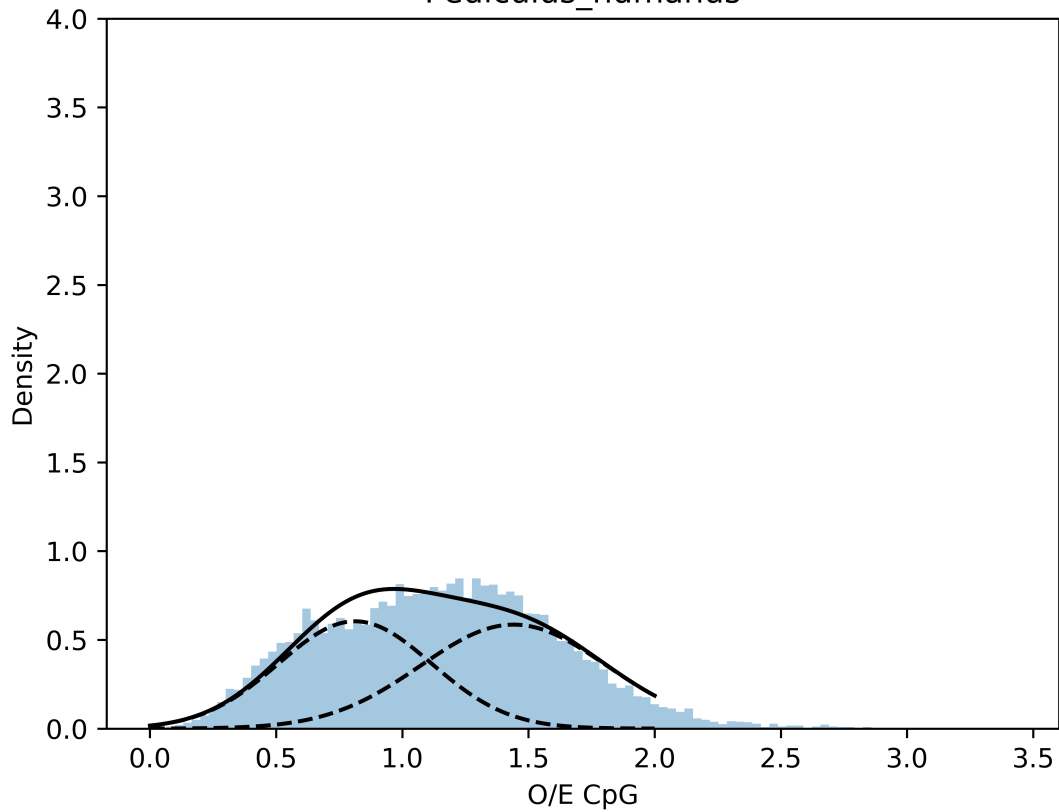

# Nilaparvata\_lugens

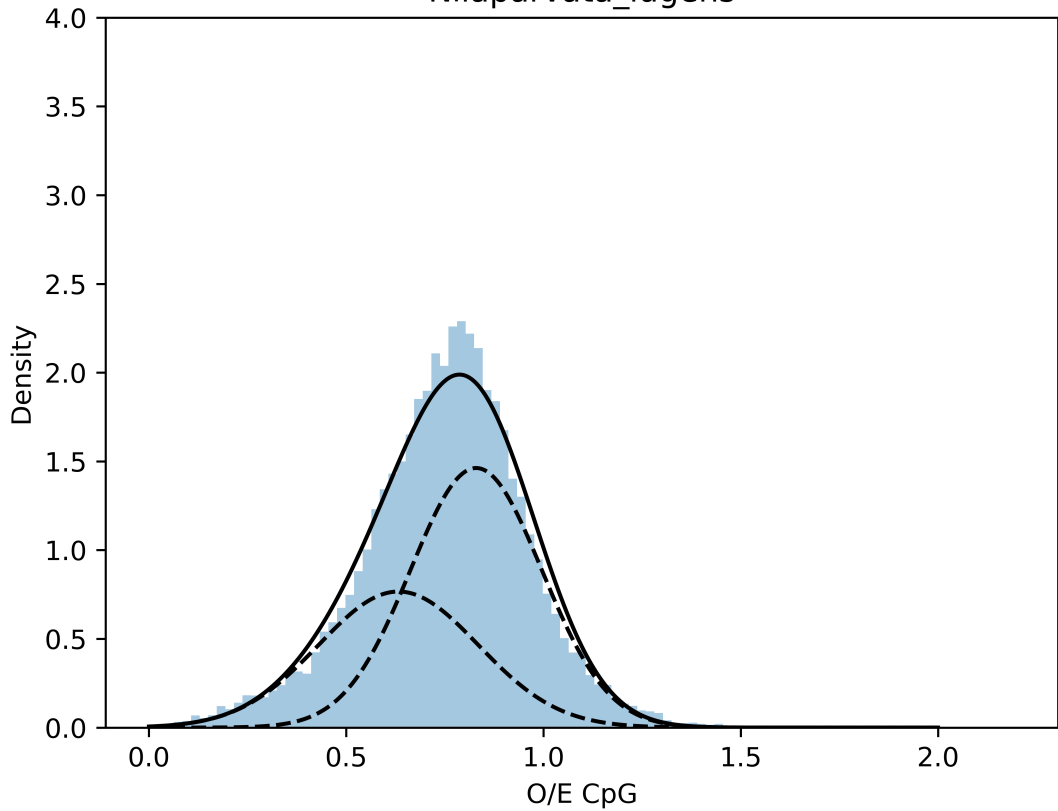

# Laodelphax\_striatellus

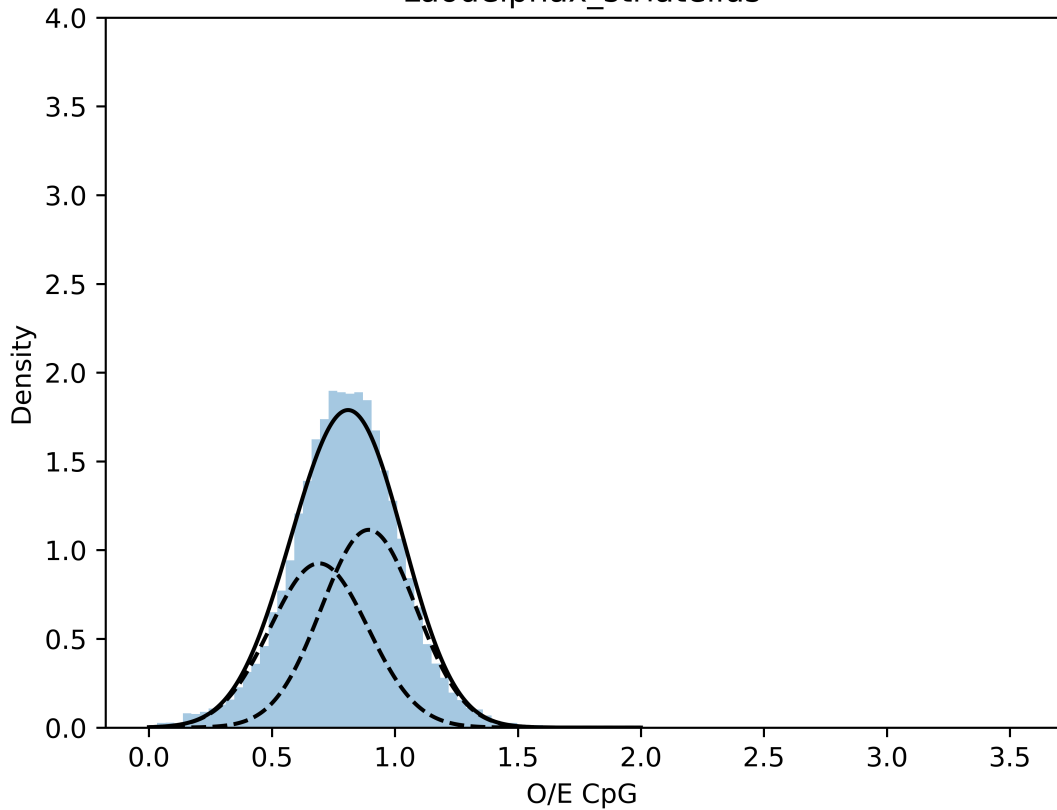

# Rhodnius\_prolixus

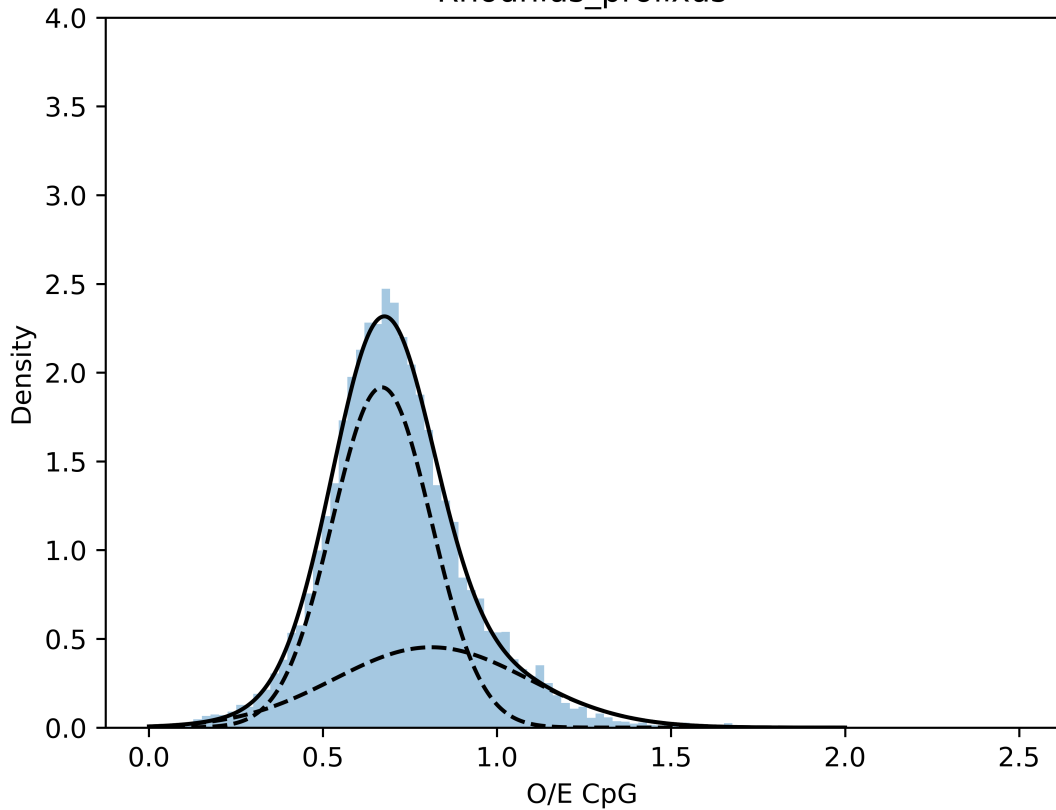

# Cimex\_lectularius

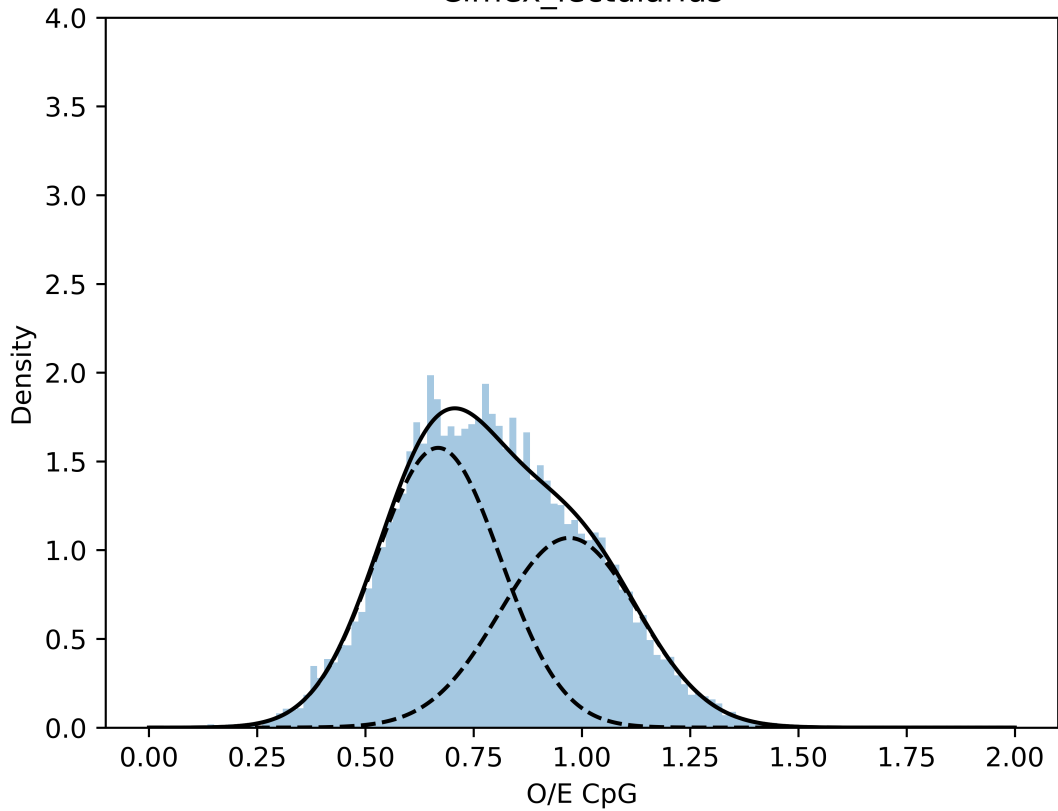

# Halyomorpha\_halys

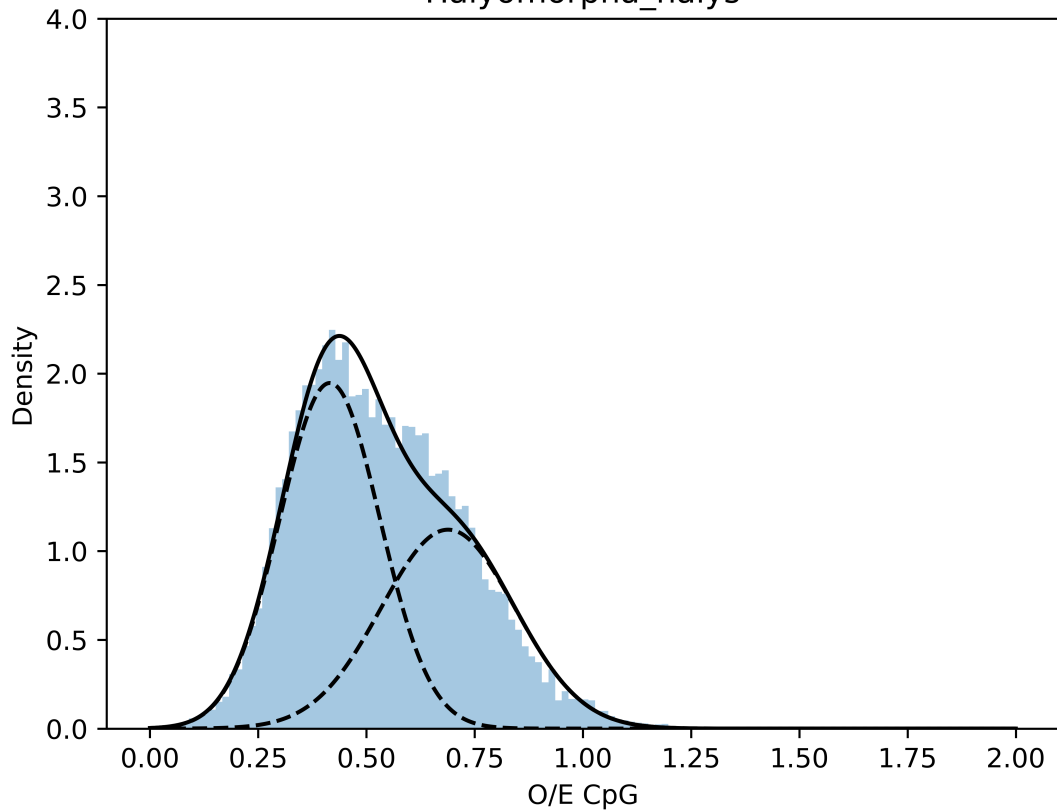



# Bemisia\_tabaci

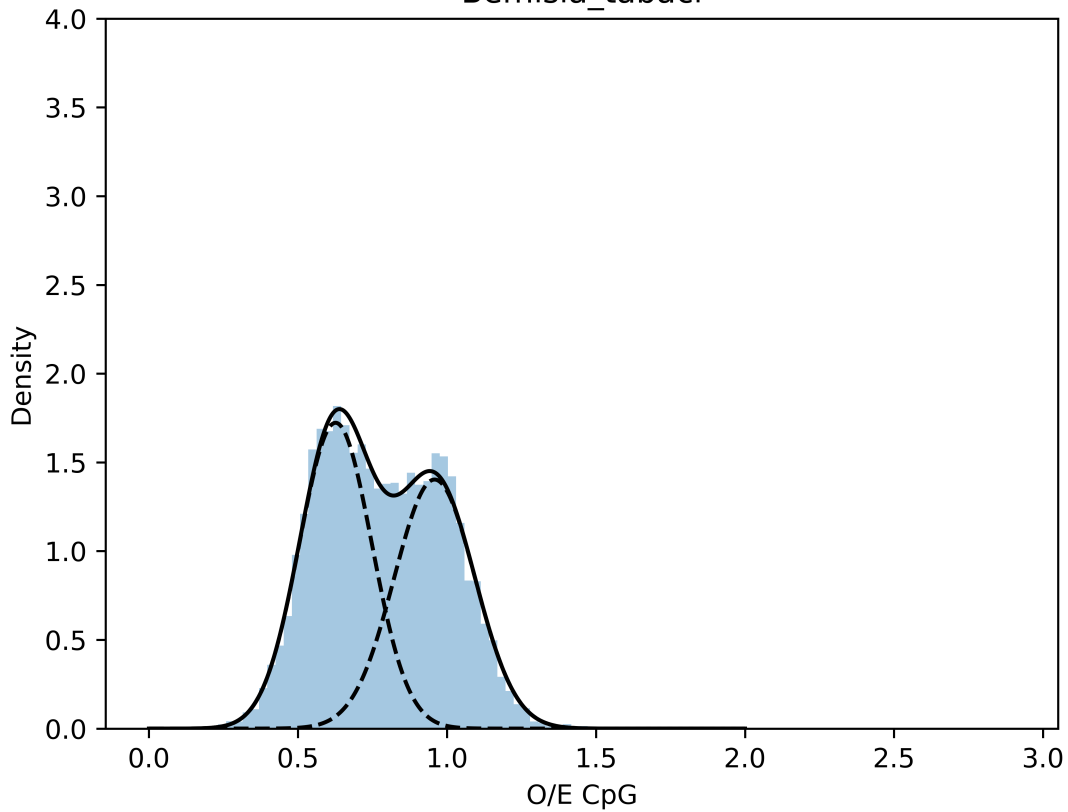

# Aphis\_gossypii

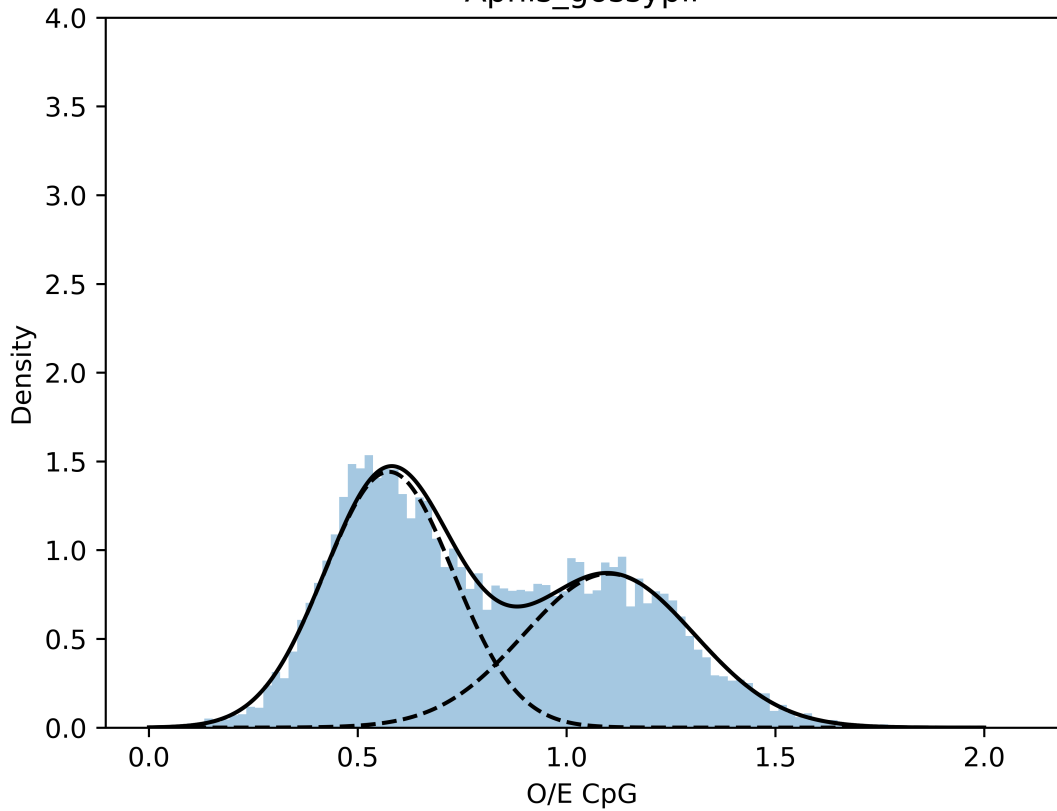

# Rhopalosiphum\_maidis

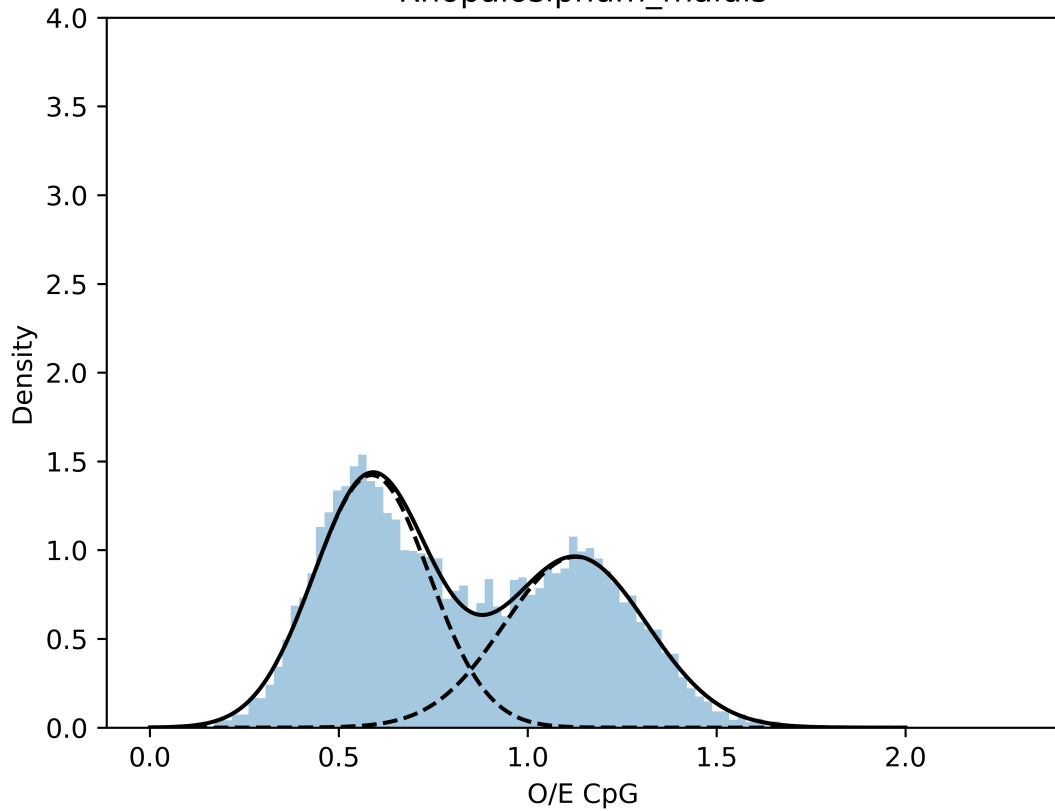

# Acyrtosiphon\_pisum

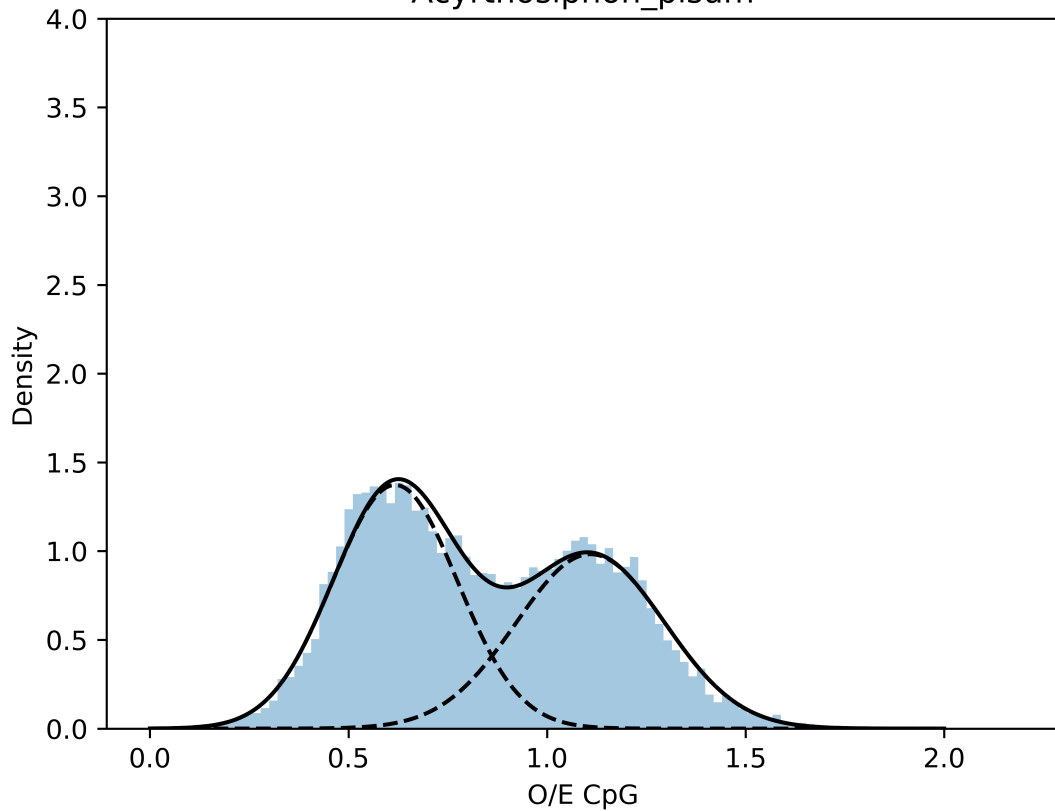

# Diuraphis\_noxia

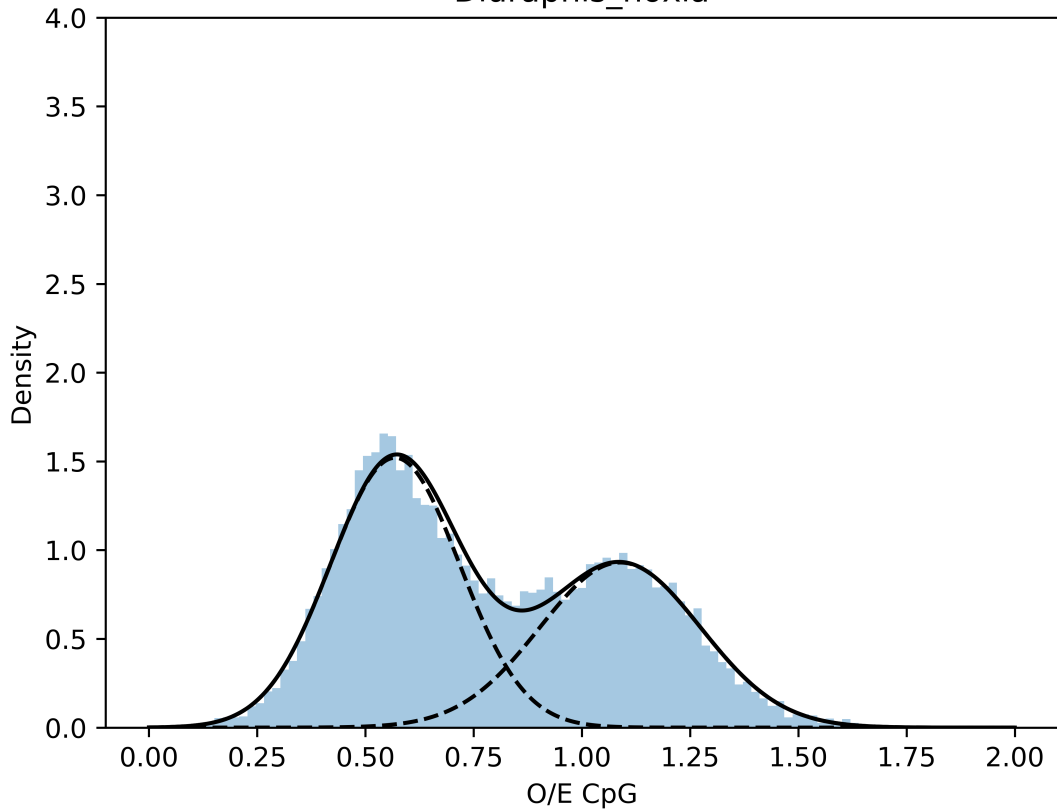

# Myzus\_persicae

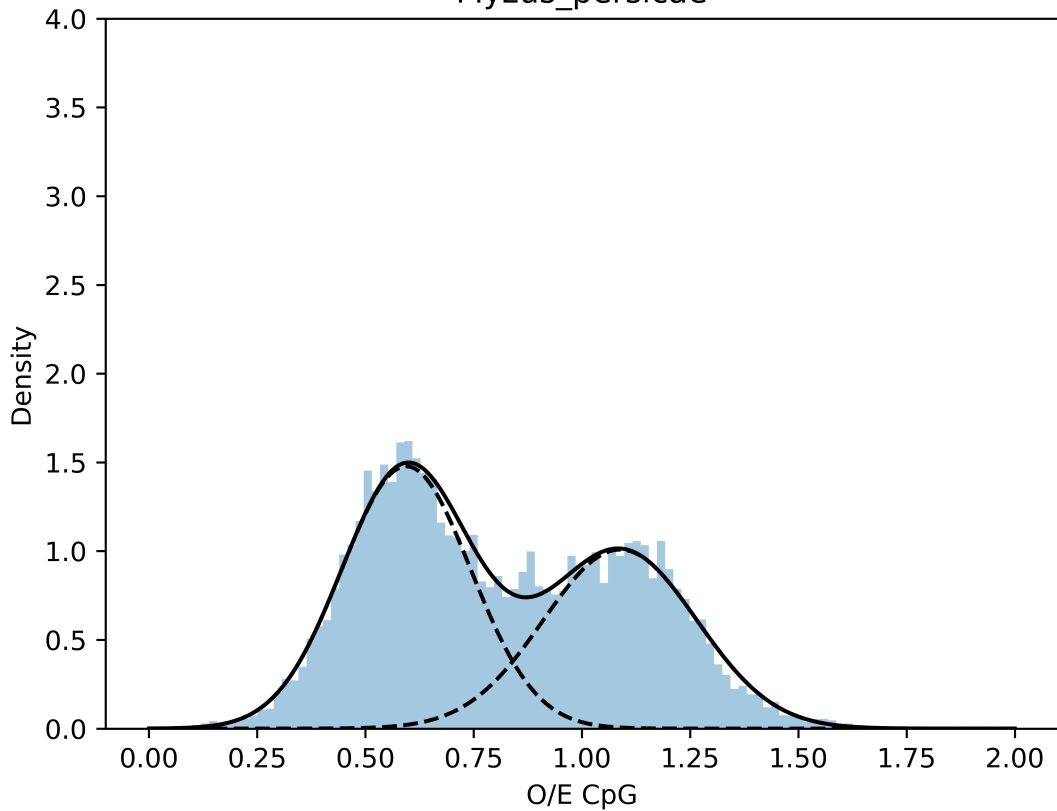

# Diaphorina\_citri

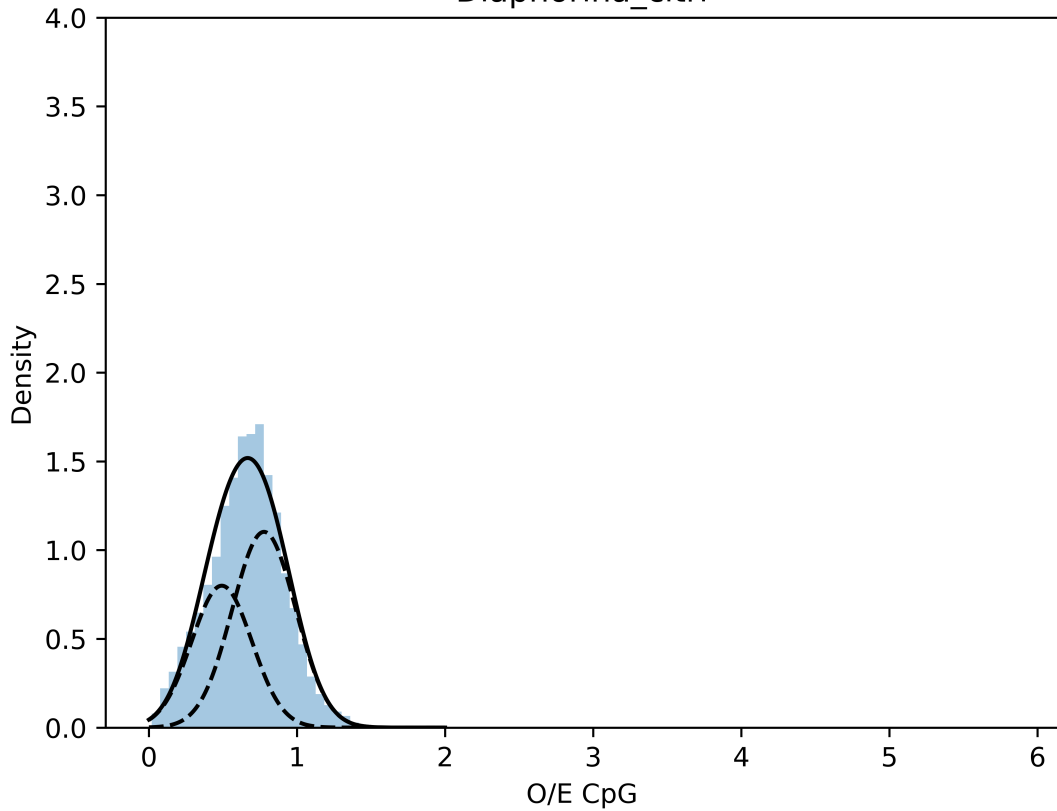

# Frankliniella\_occidentalis

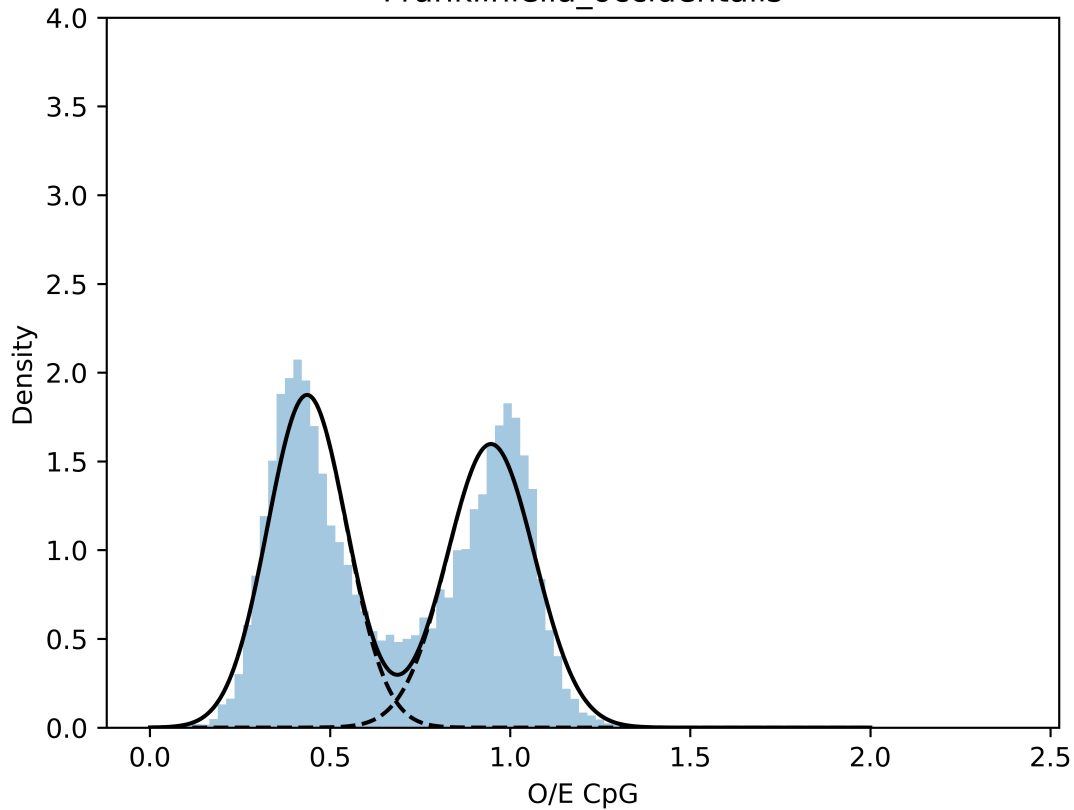



# Zootermopsis\_nevadensis

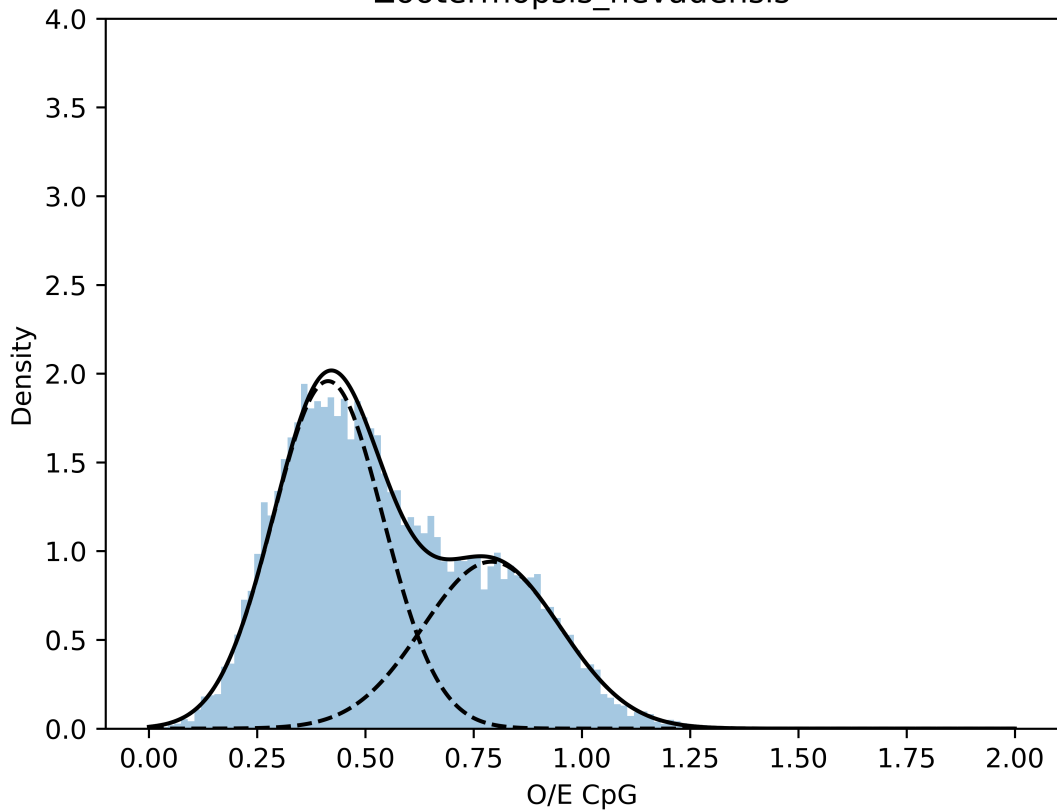

# Cryptotermes\_secundus

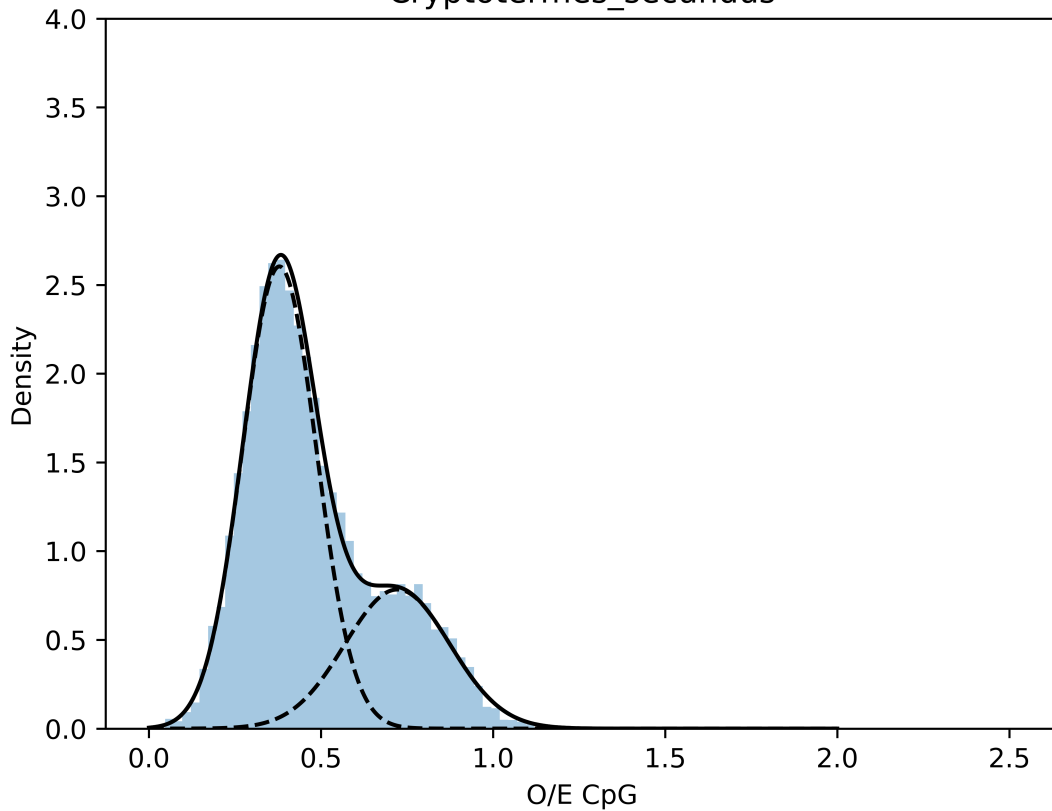

# Blattela\_germanica

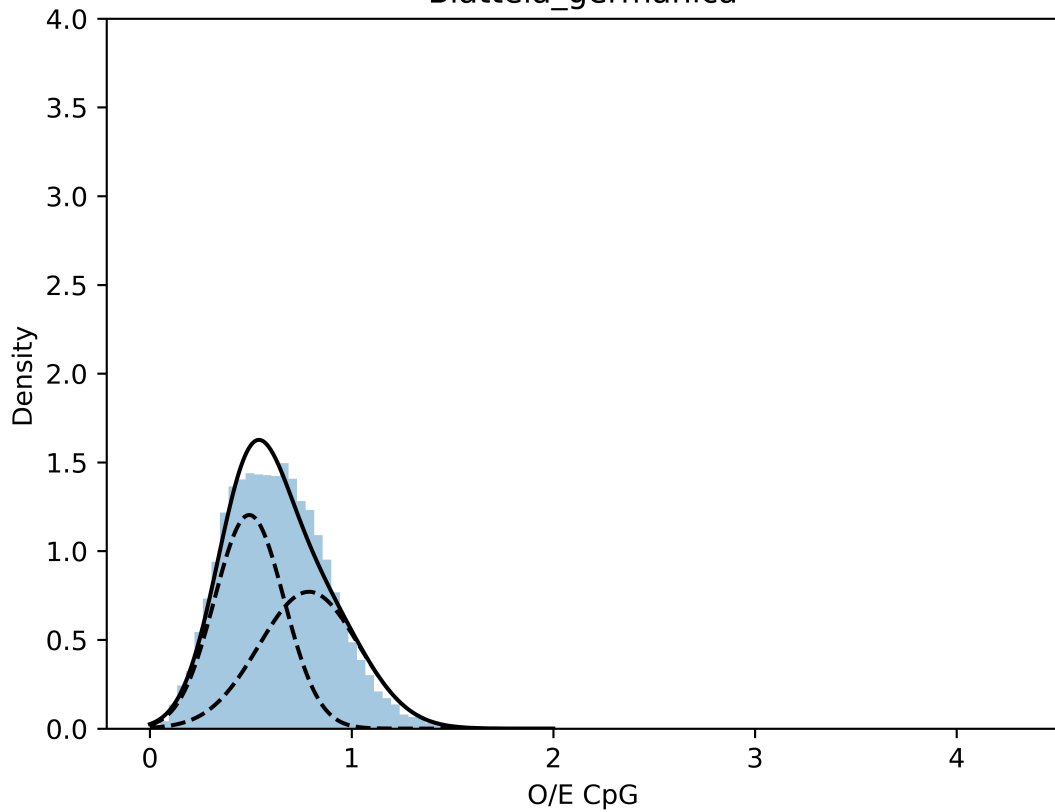

# Orchesella\_cincta

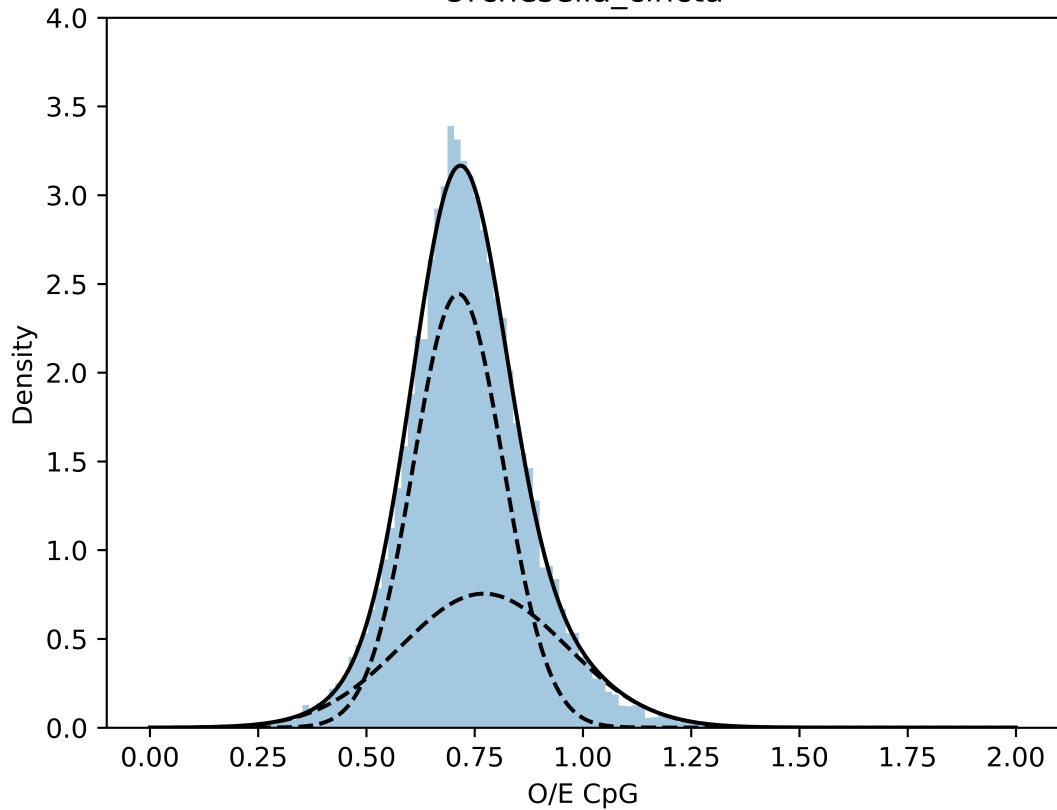

# Folsomia\_candida

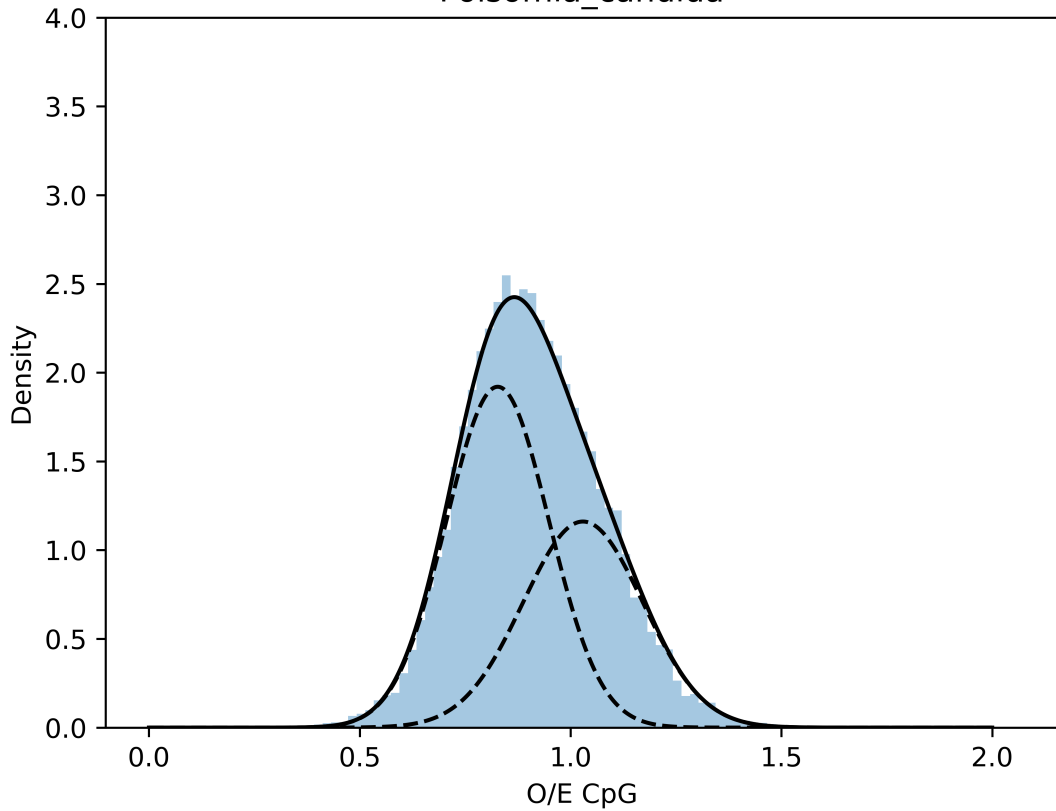

# Daphnia\_pulex

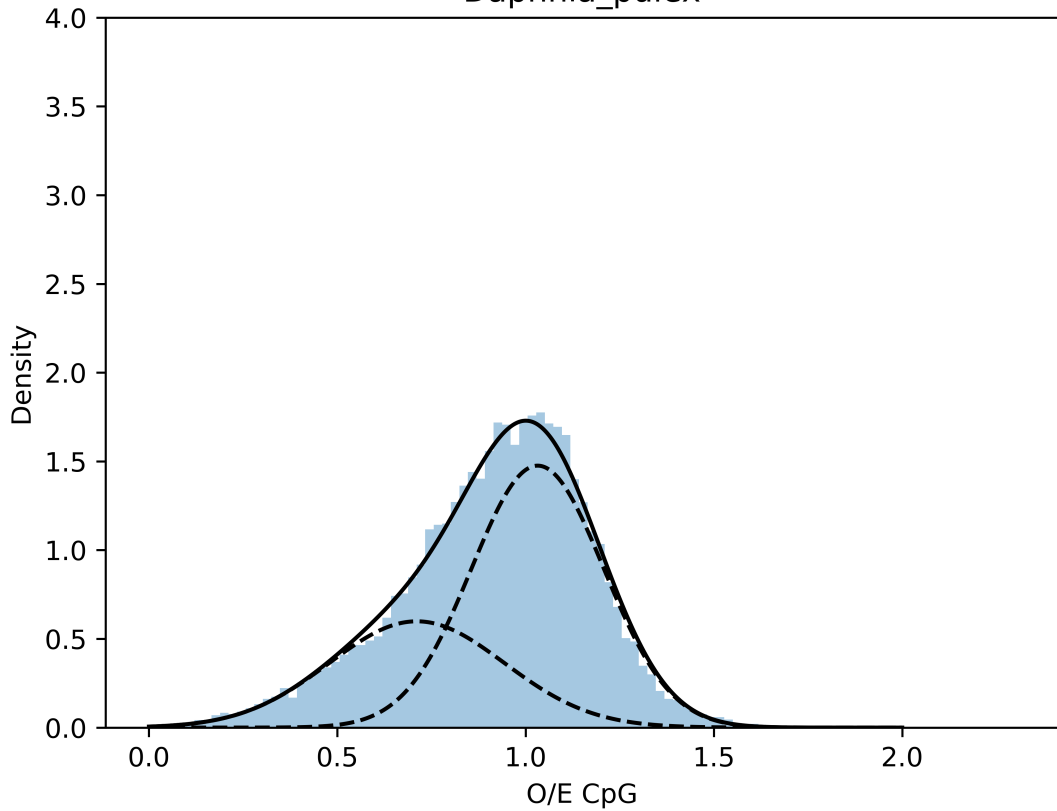

# Daphnia\_magna

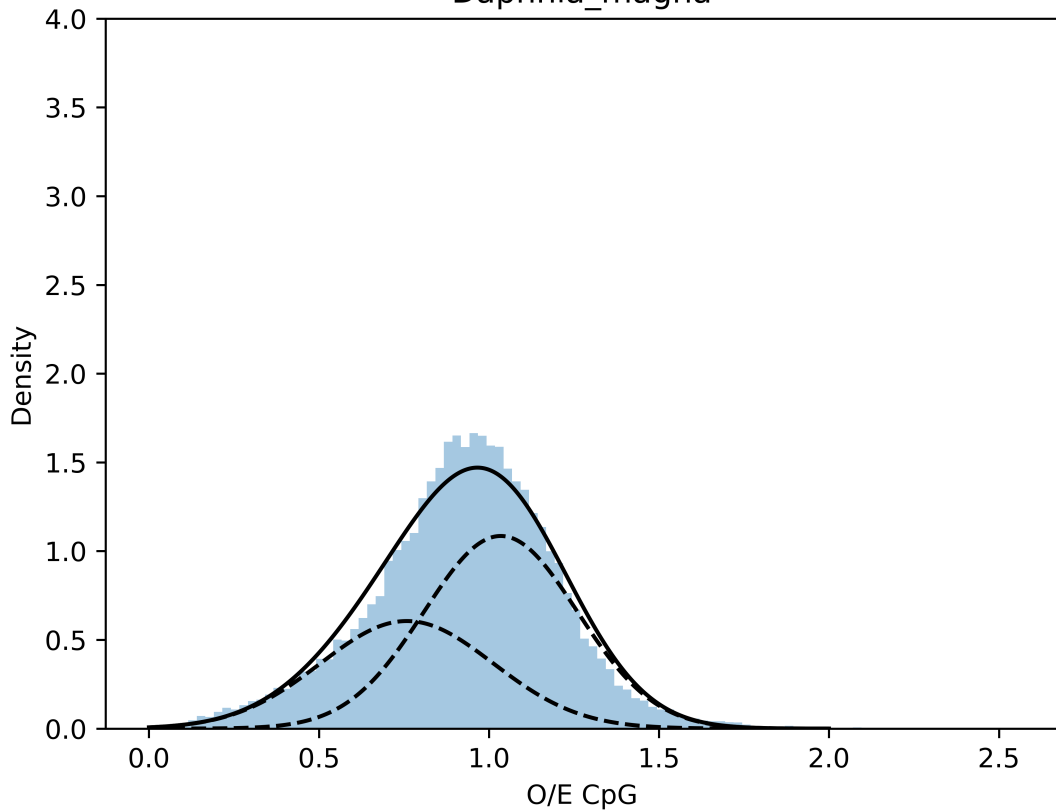

# Lepeophtheirus\_salmonis

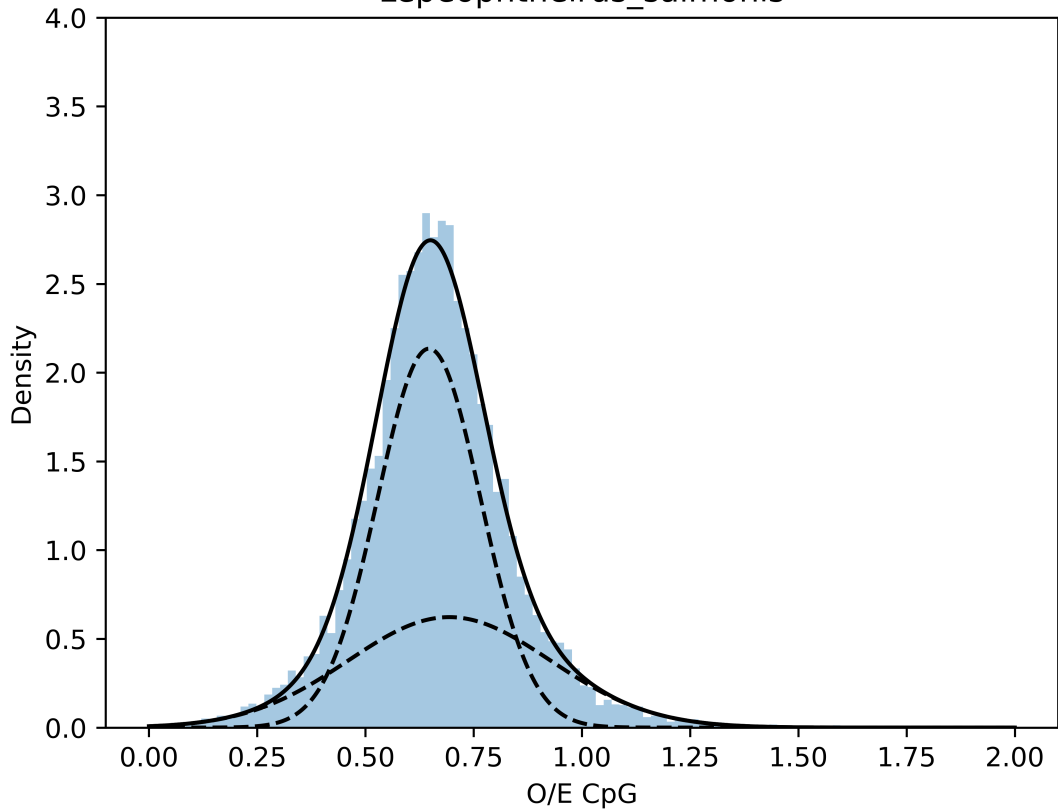



# Eurytemora\_affinis

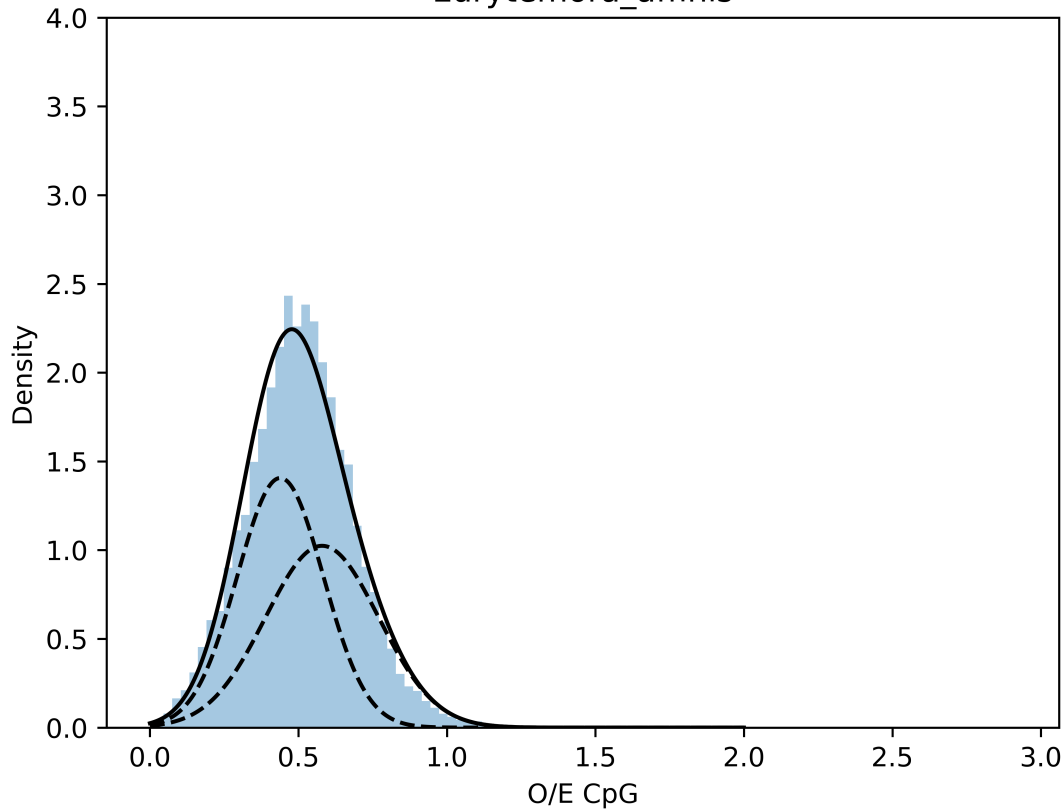

# Tigriopus\_californicus

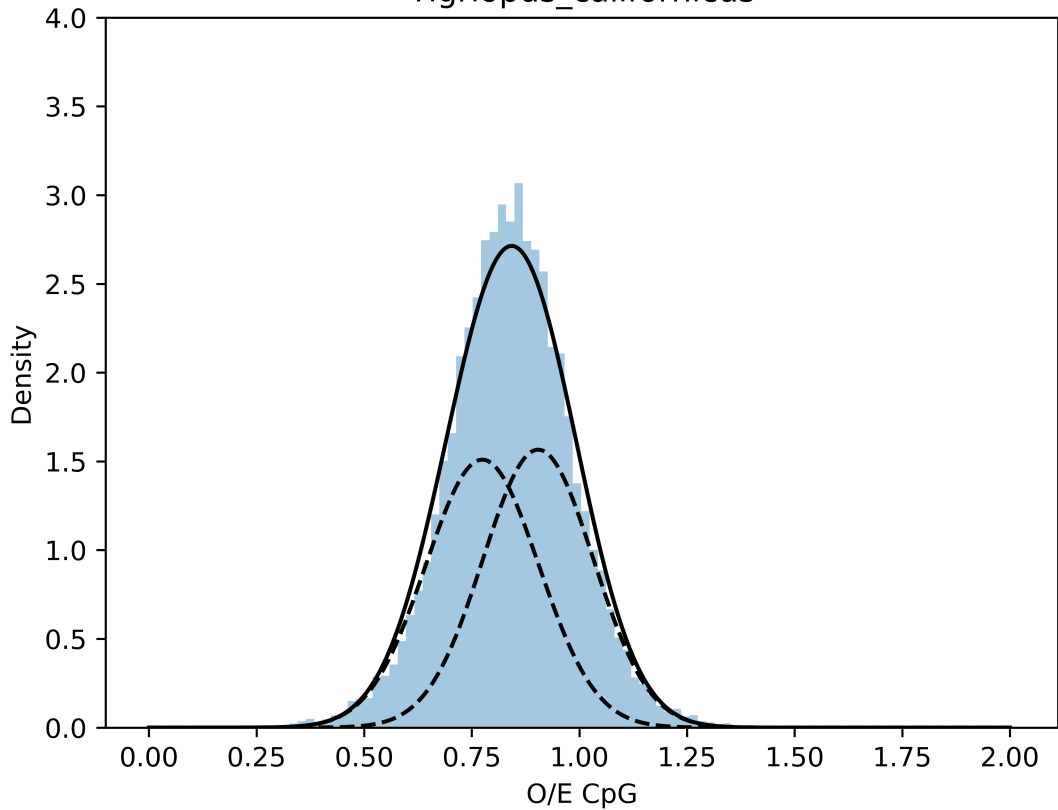

# Penaeus\_vannamei

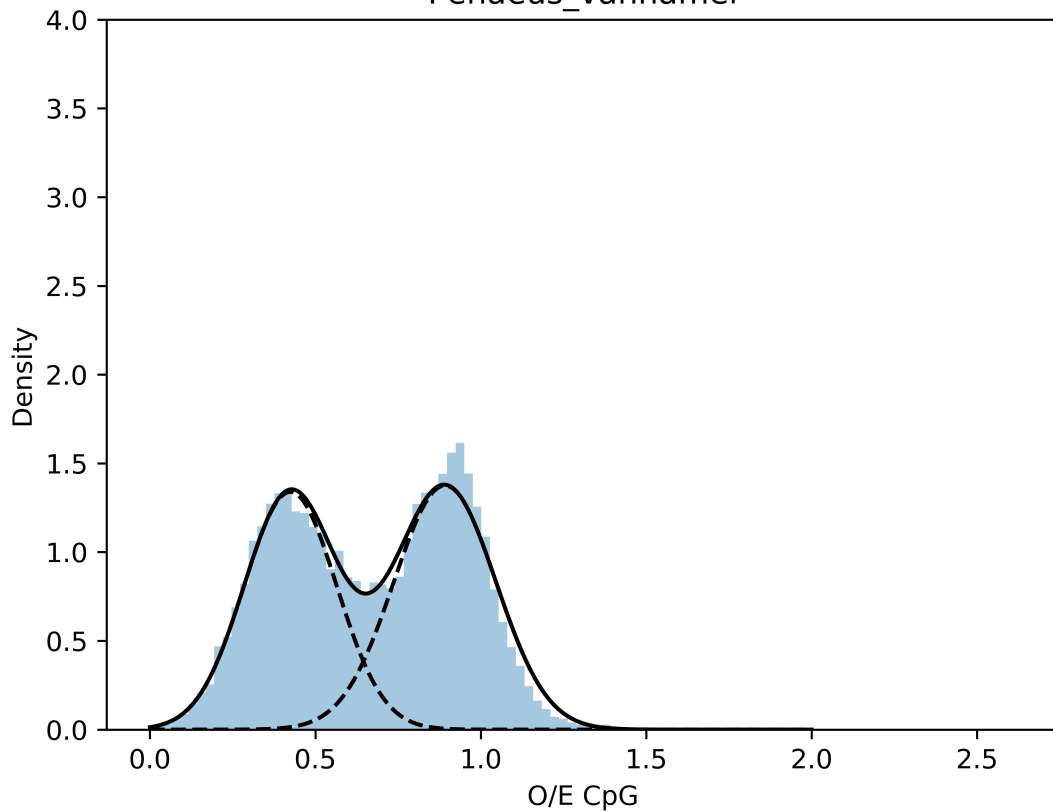

# Armadillidium\_vulgare

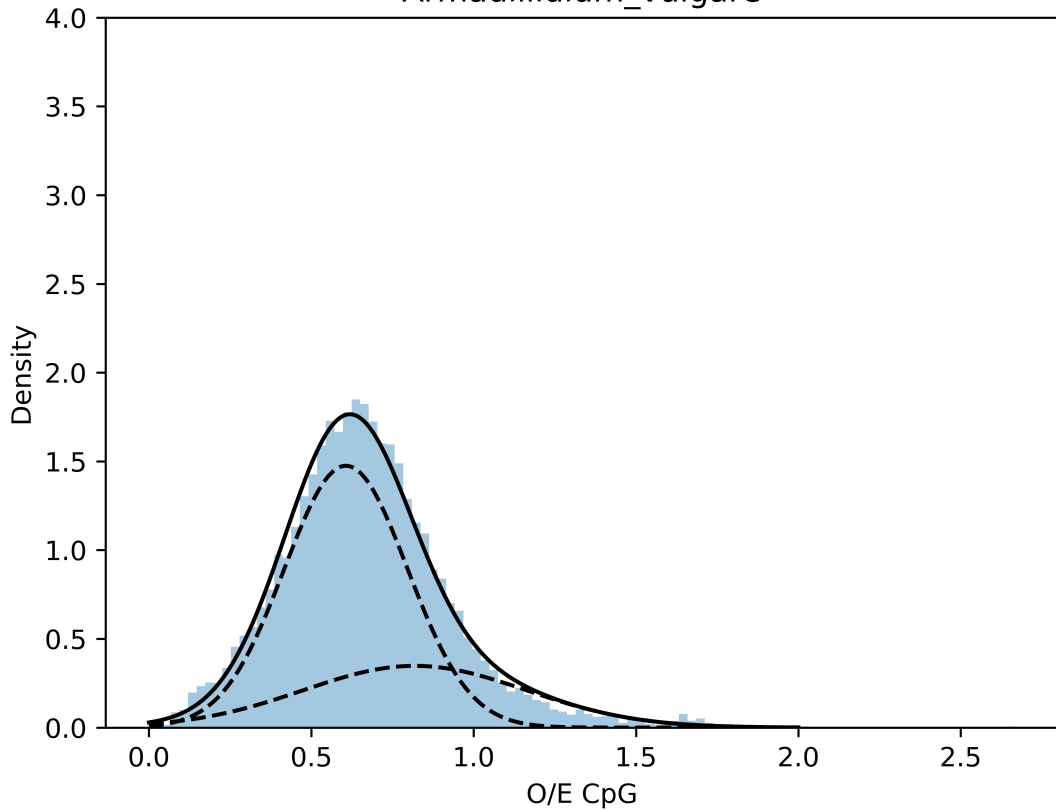

# Hyalella\_azteca

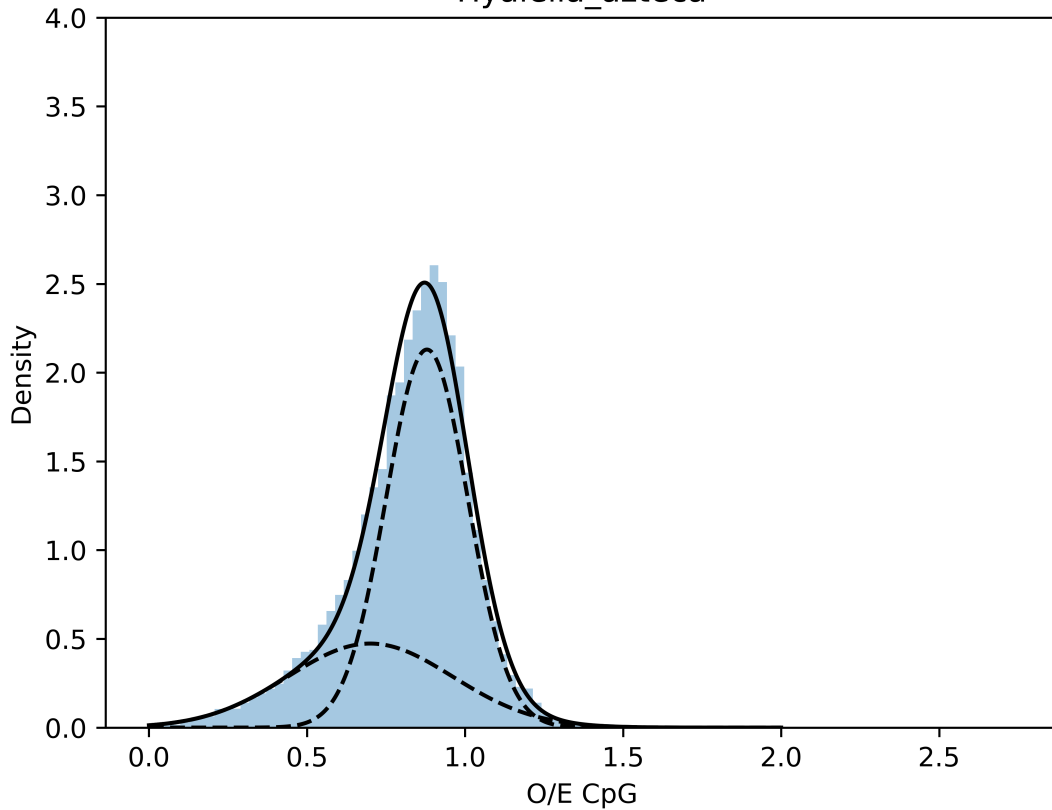

# Limulus\_polyphemus

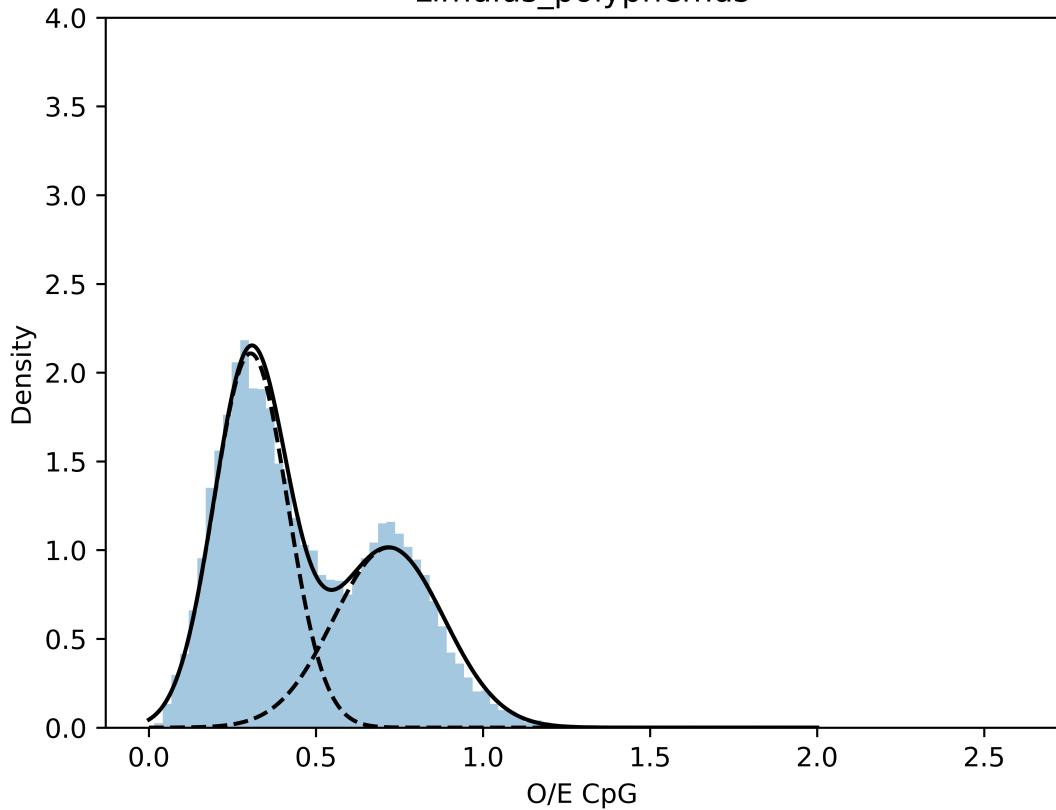

# Centruroides\_sculpturatus

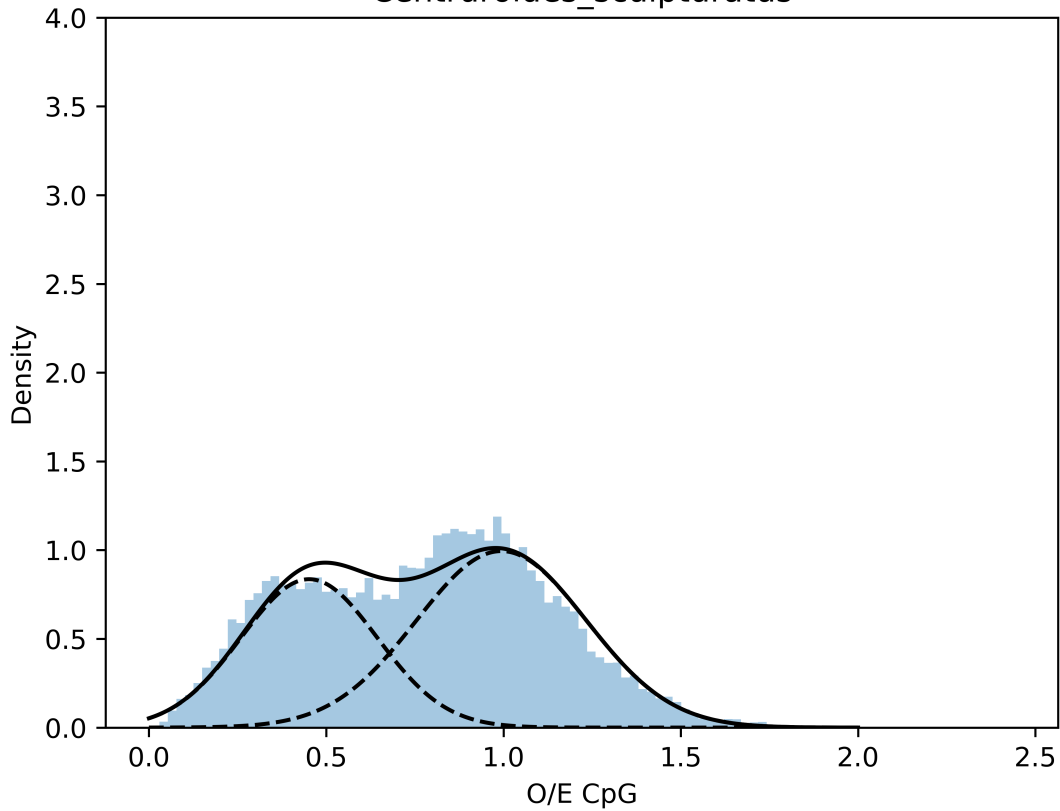

# Stegodyphus\_mimosarum

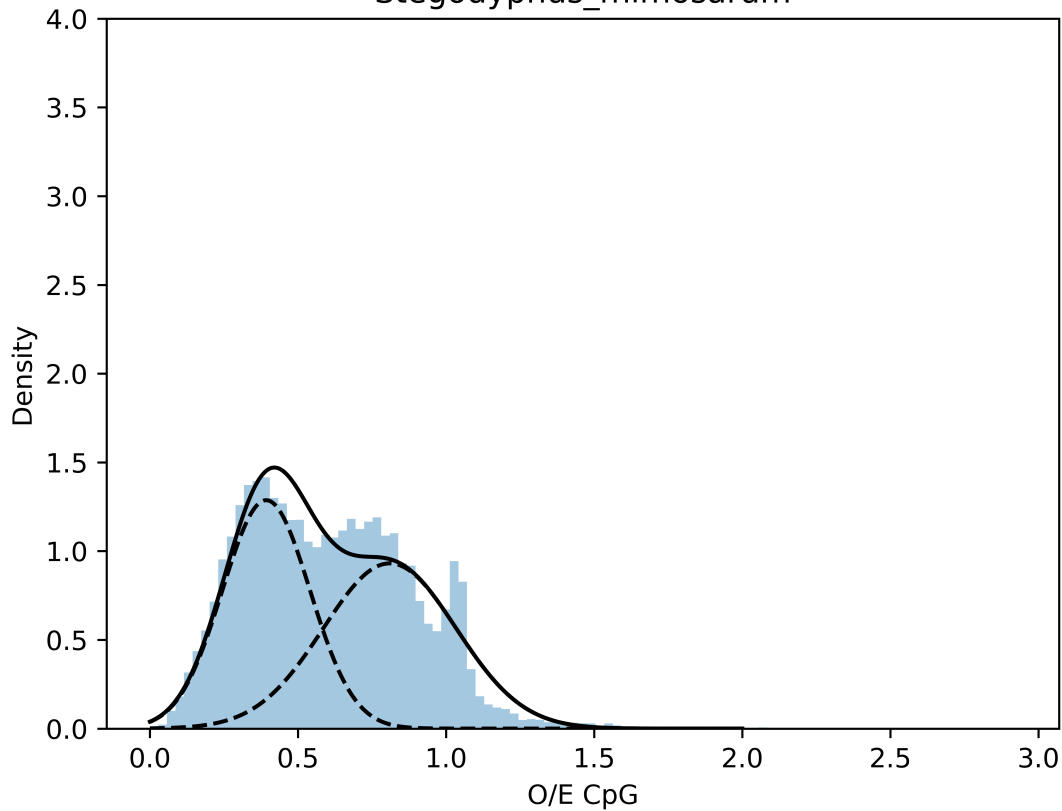



# Parasteatoda\_tepidariorum

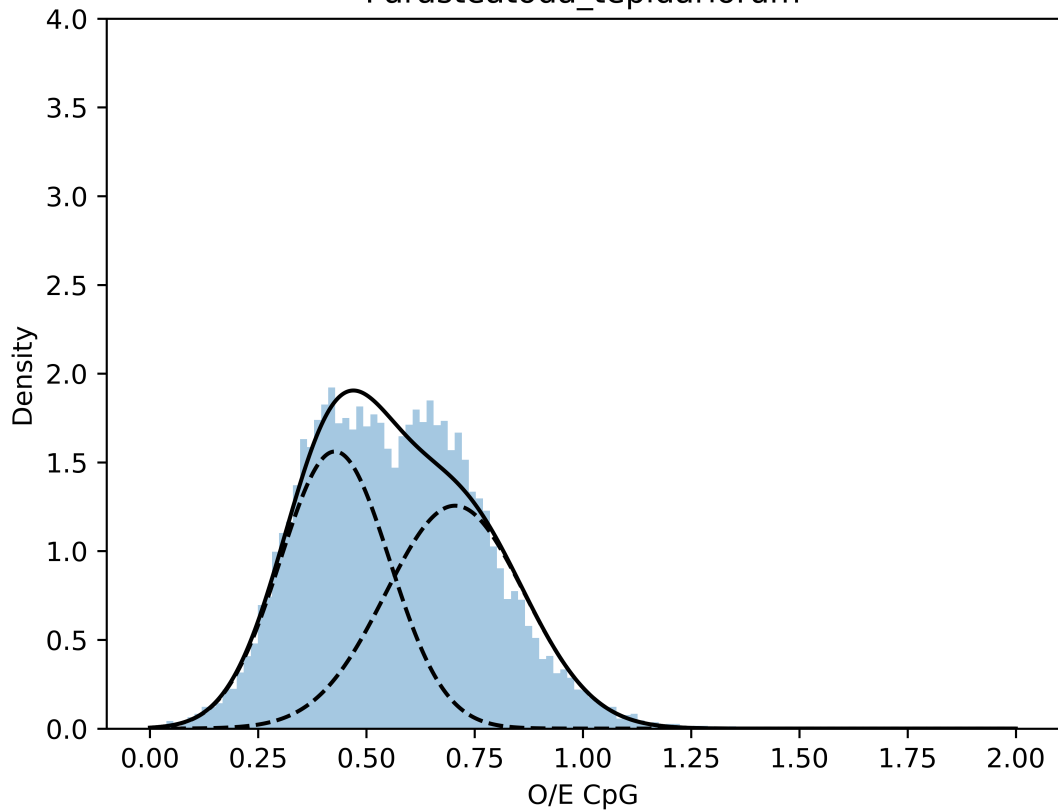

# Trichonephila\_clavipes

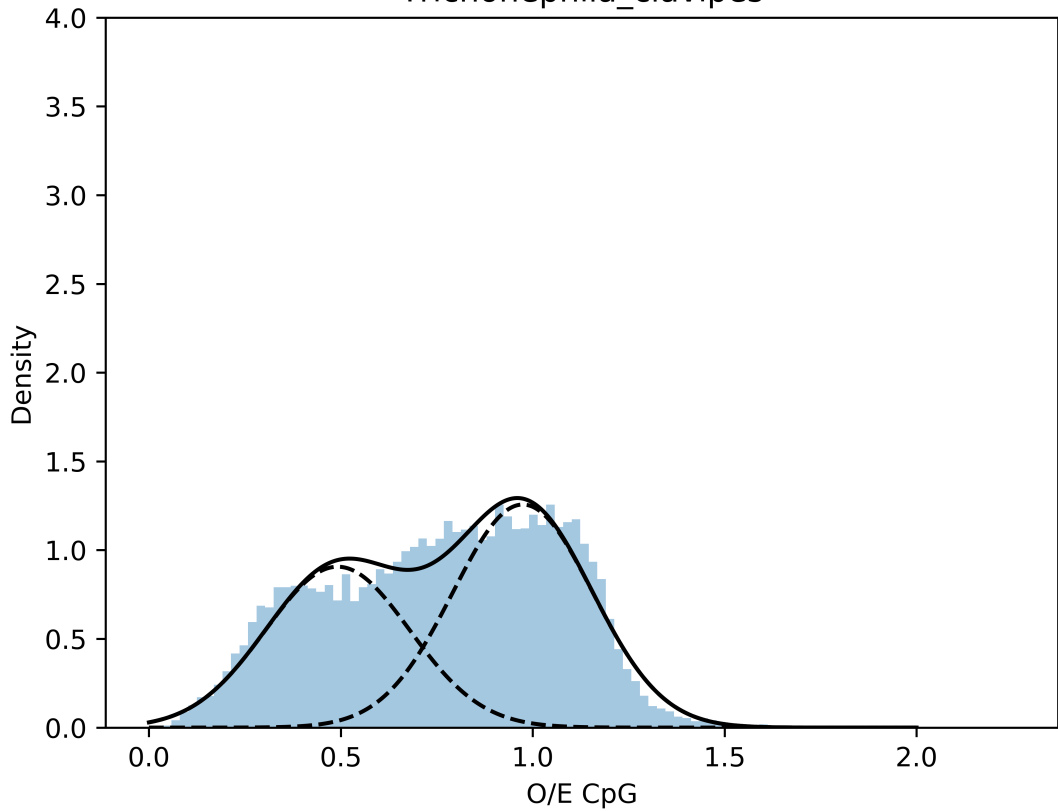

# Dermatophagoides\_pteronyssinus

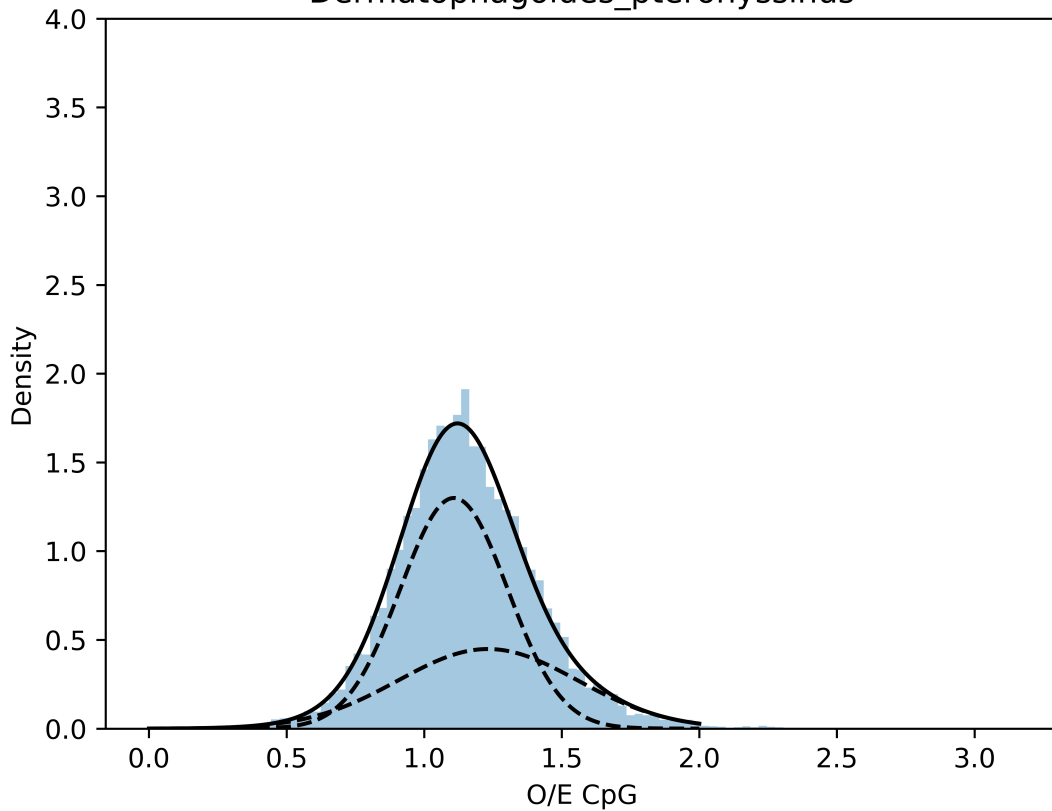

# Euroglyphus\_maynei

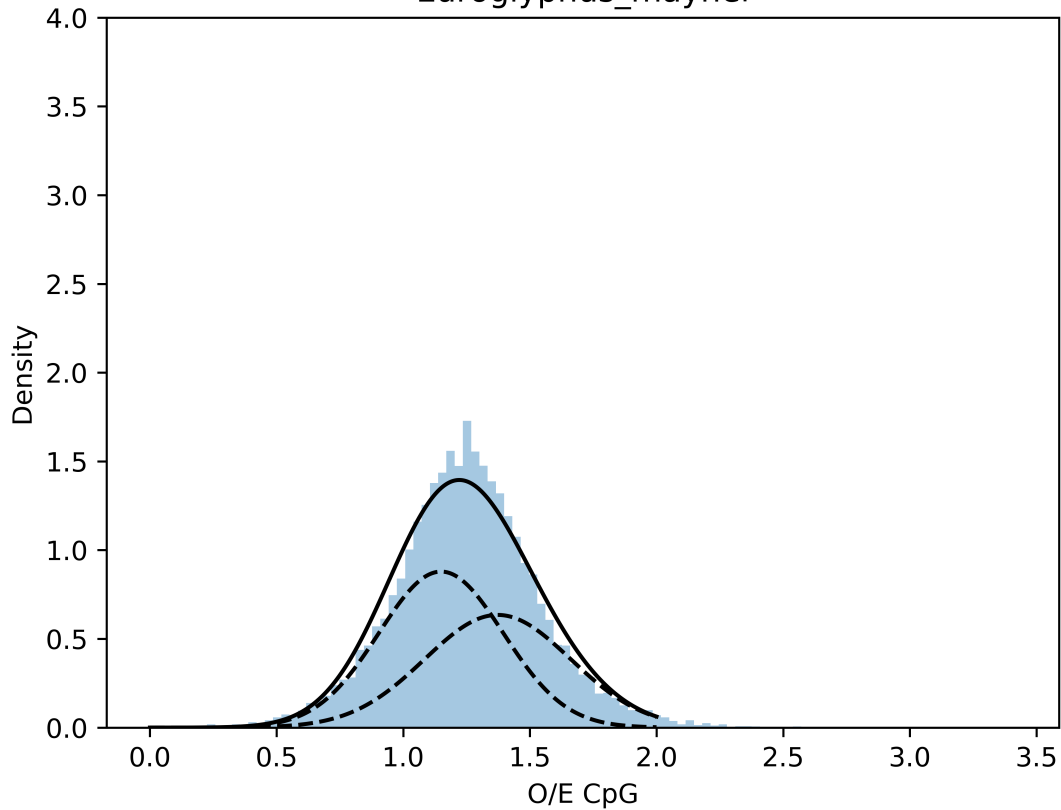

# Sarcoptes\_scabiei

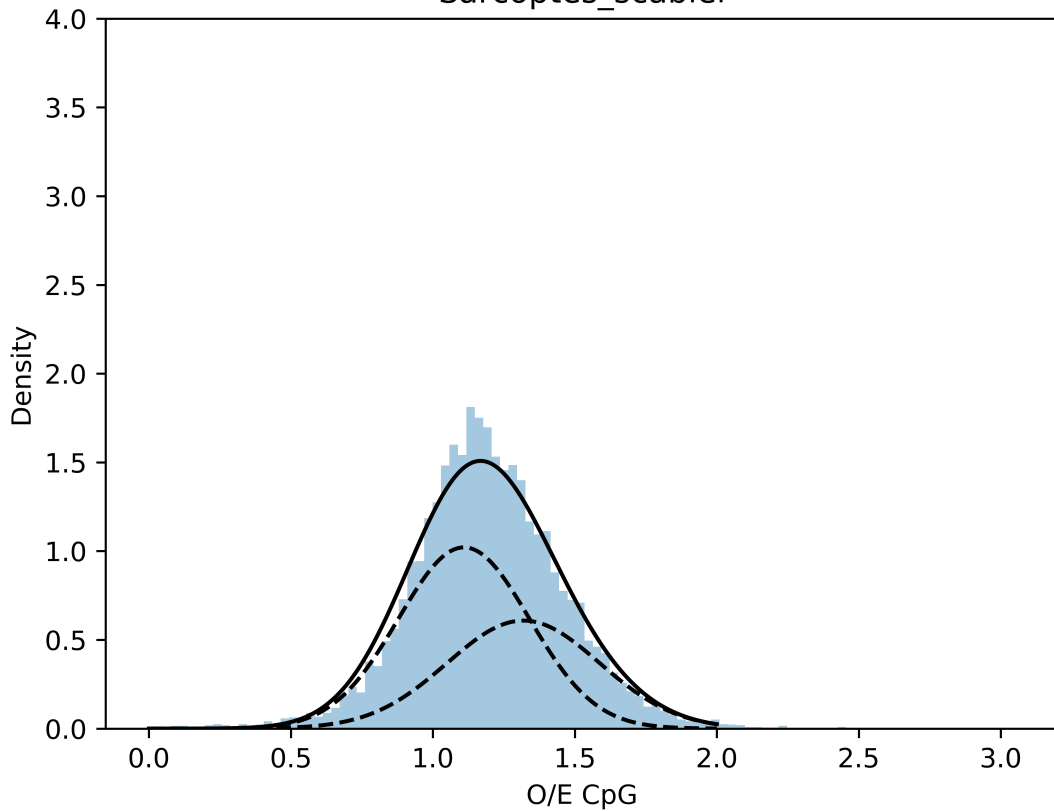

# Tetranychus\_urticae

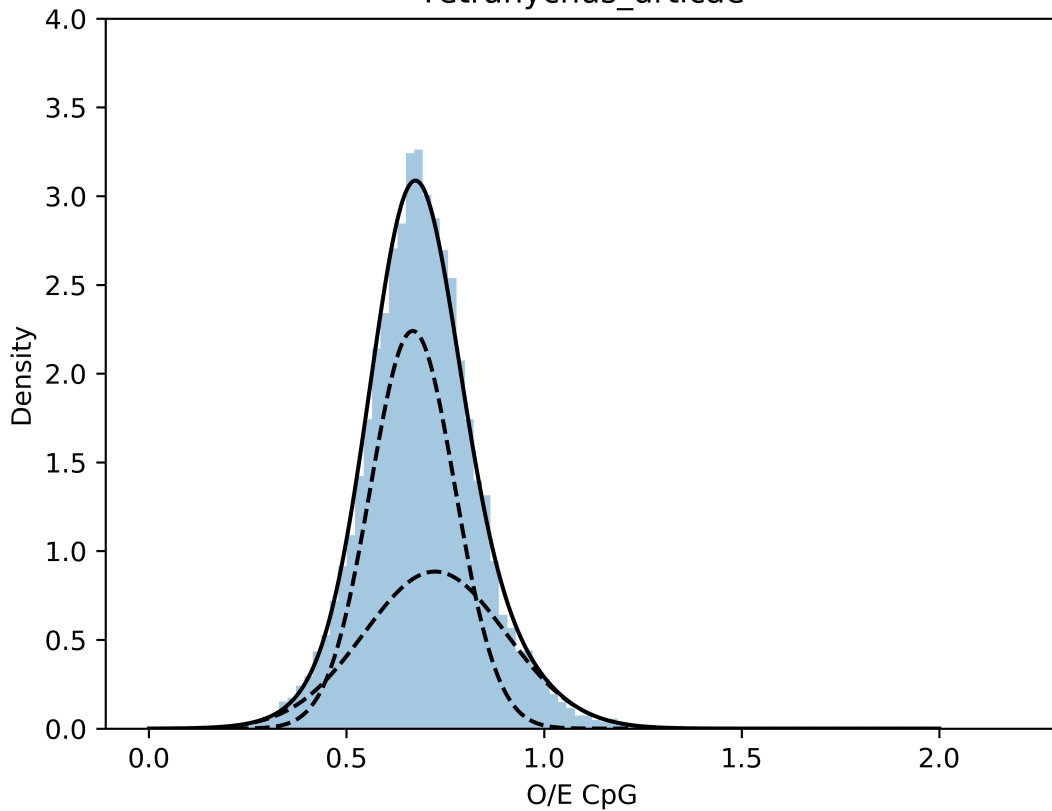

# Dinothrombium\_tinctorium

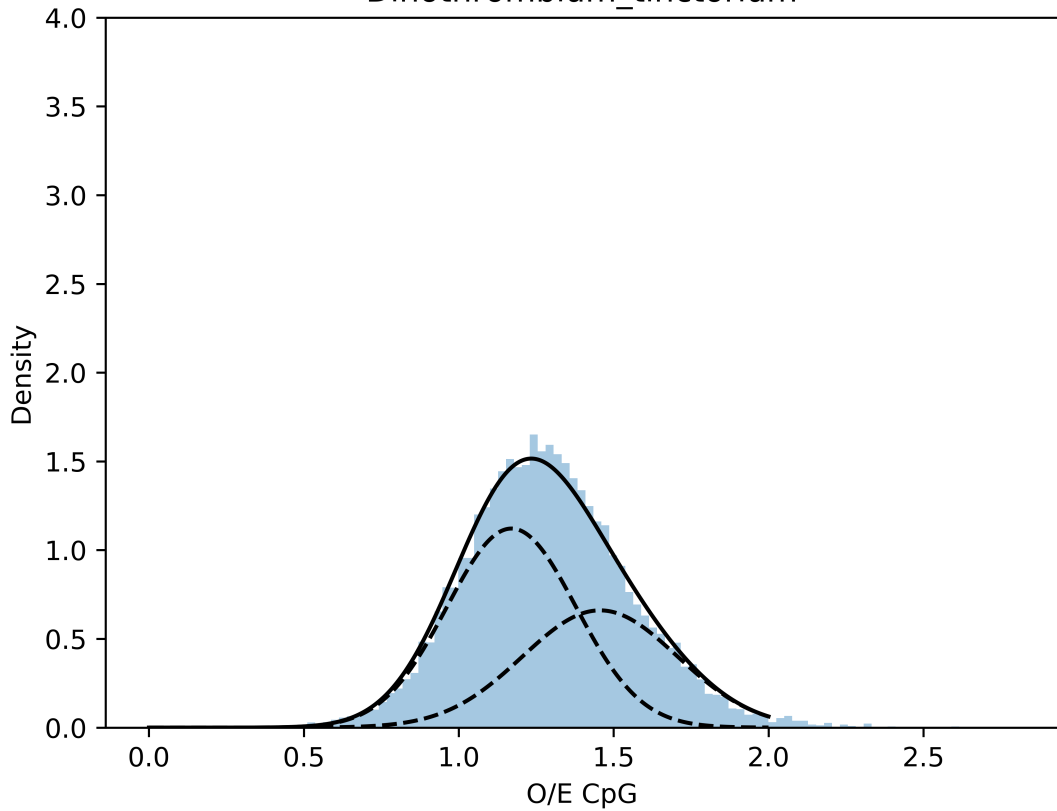

# Leptotrombidium\_deliense

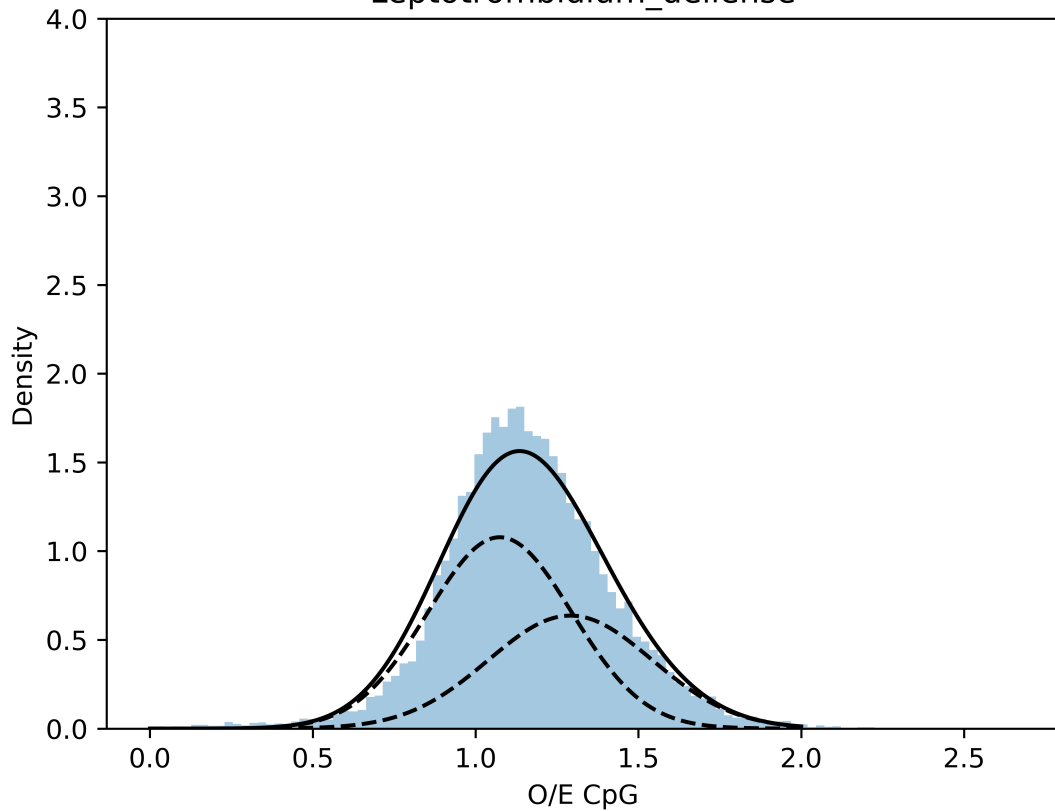



# Ixodes\_scapularis

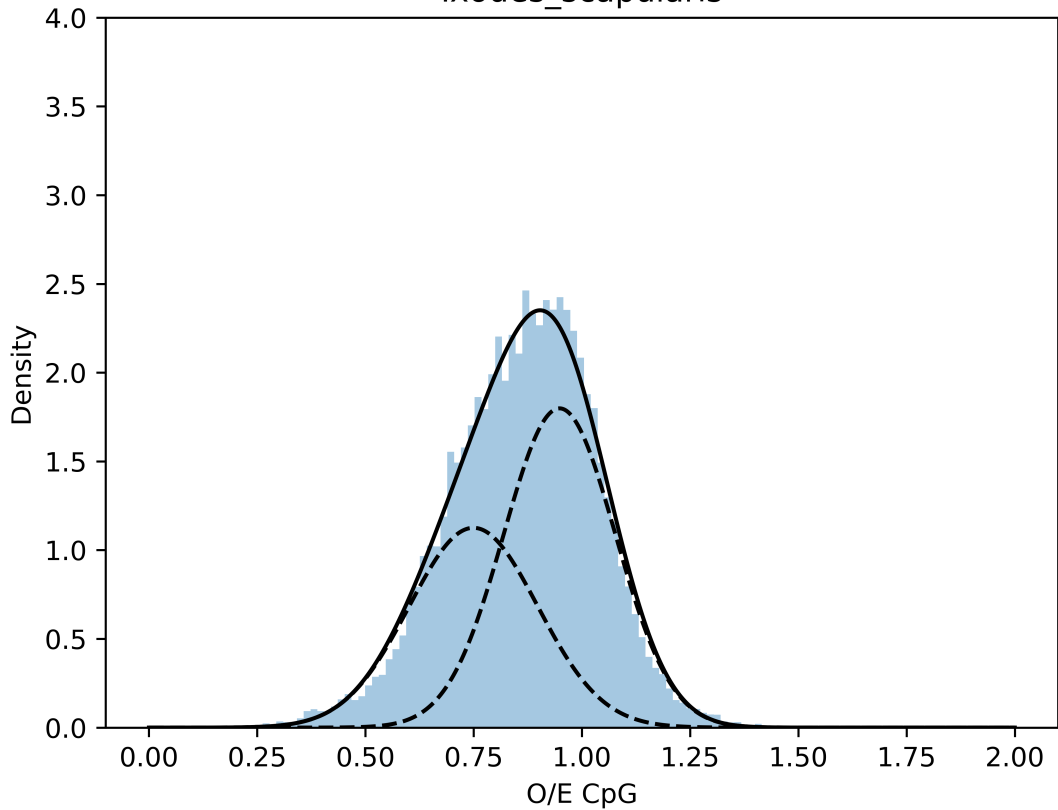

# Tropilaelaps\_mercedesae

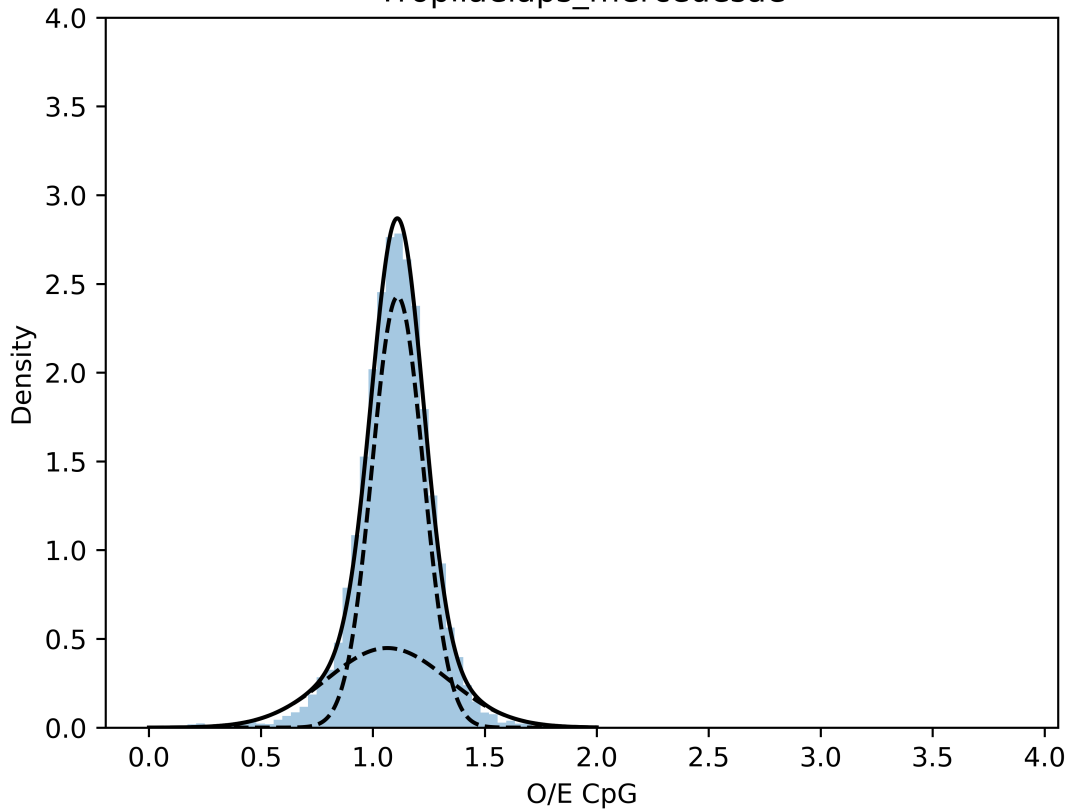

# Varroa\_destructor

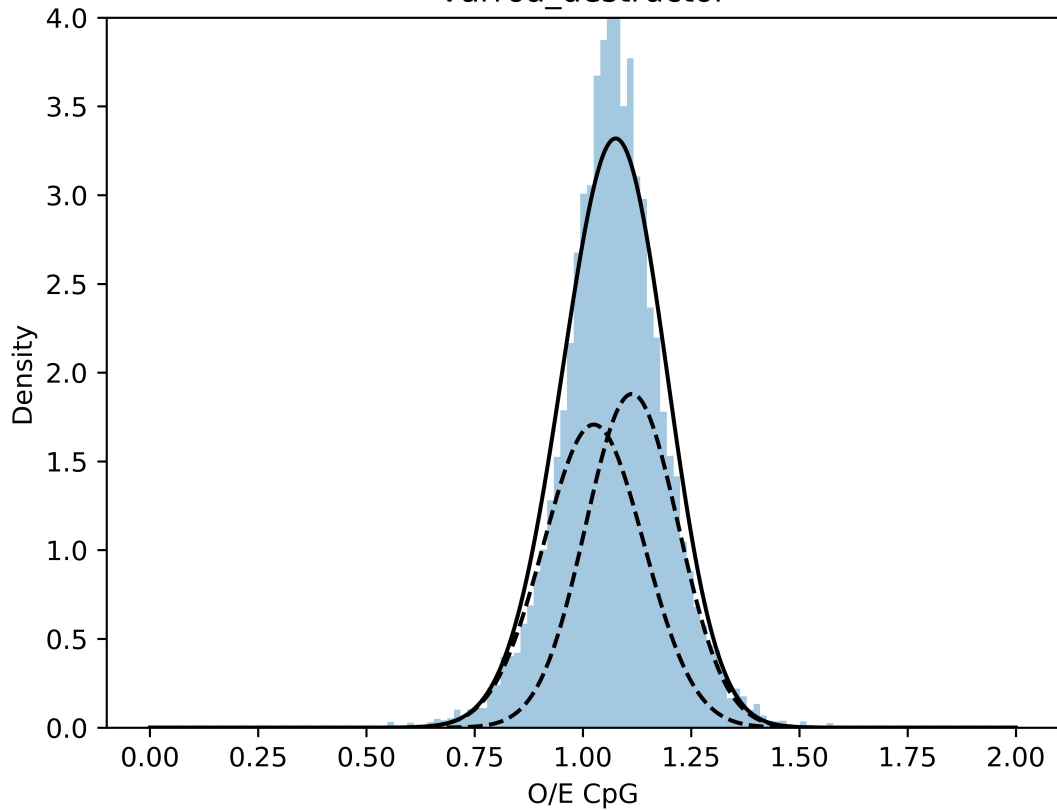

# Varroa\_jacobsoni

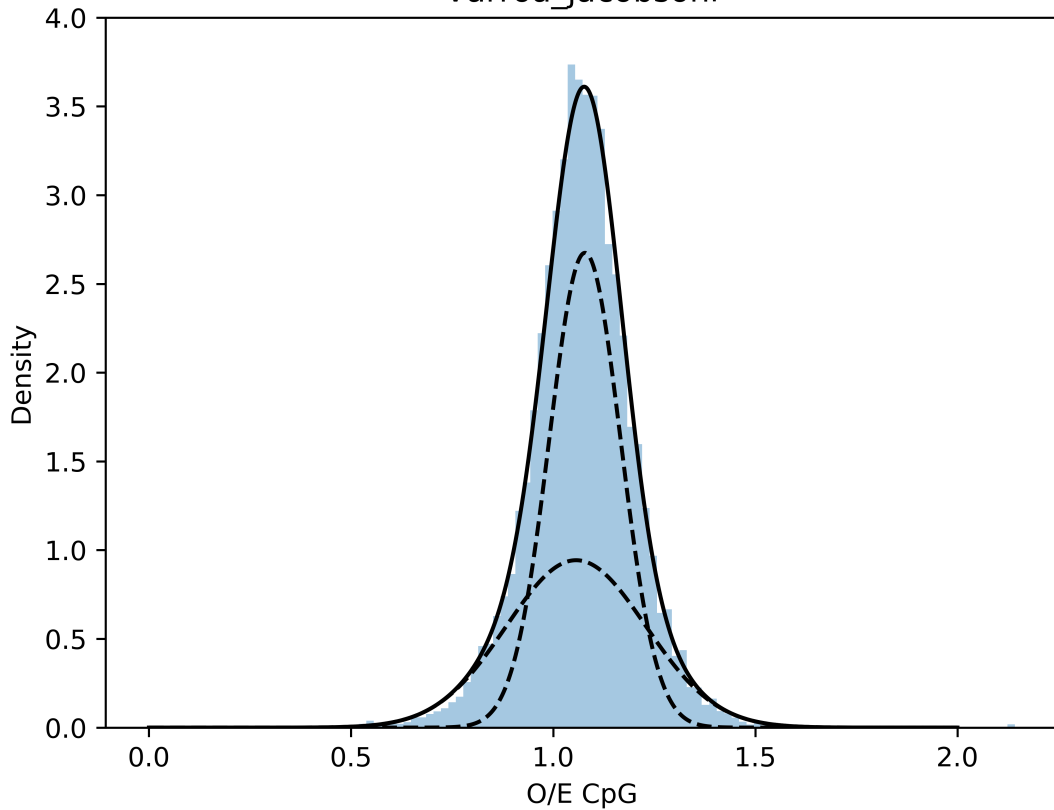

# Galendromus\_occidentalis

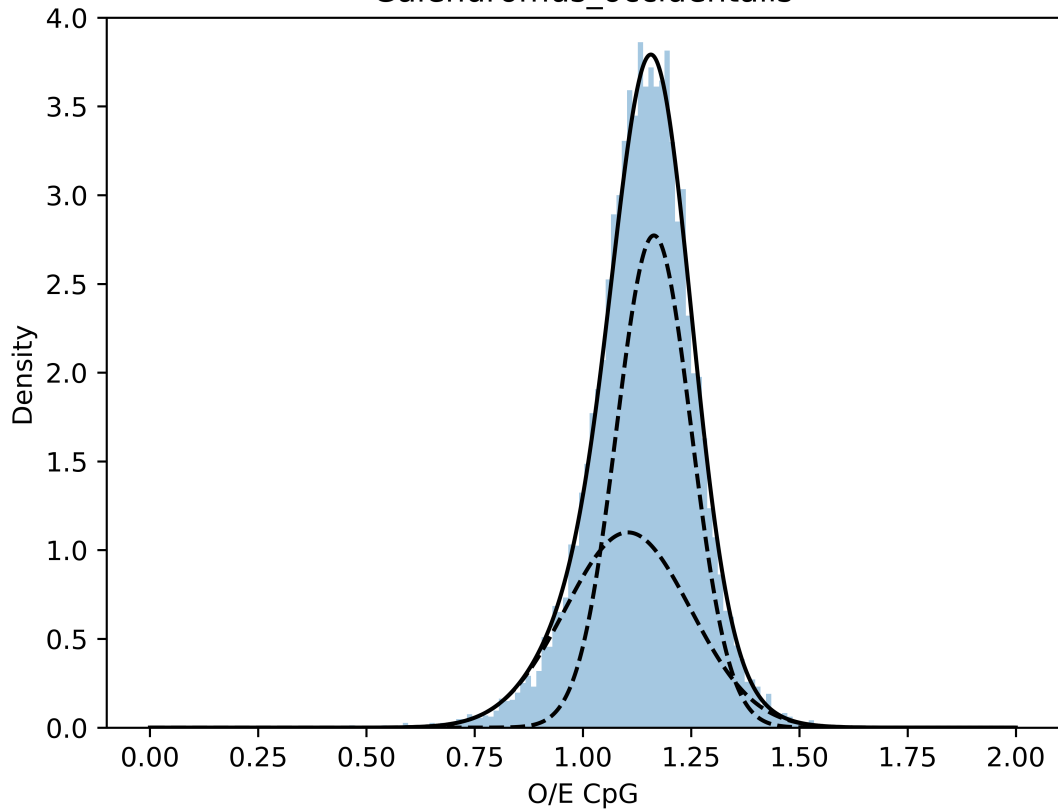

# Strigamia\_maritima

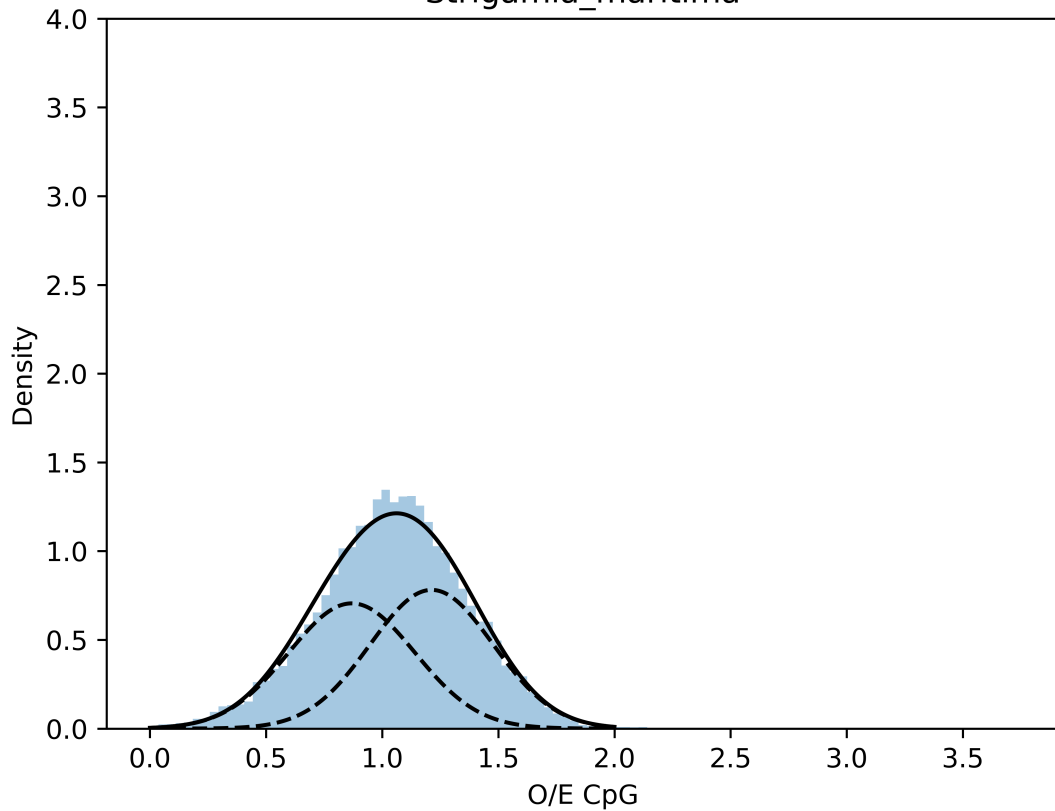

# Ramazzottius\_varieornatus

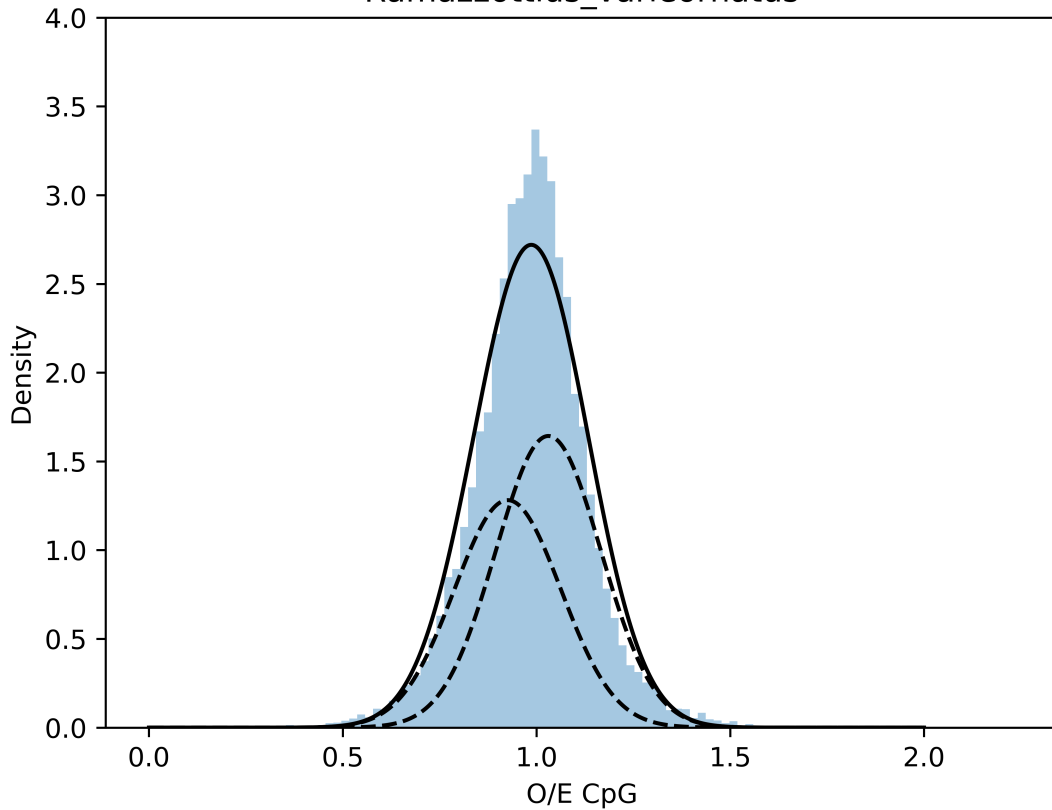

# Hypsibius\_dujardini

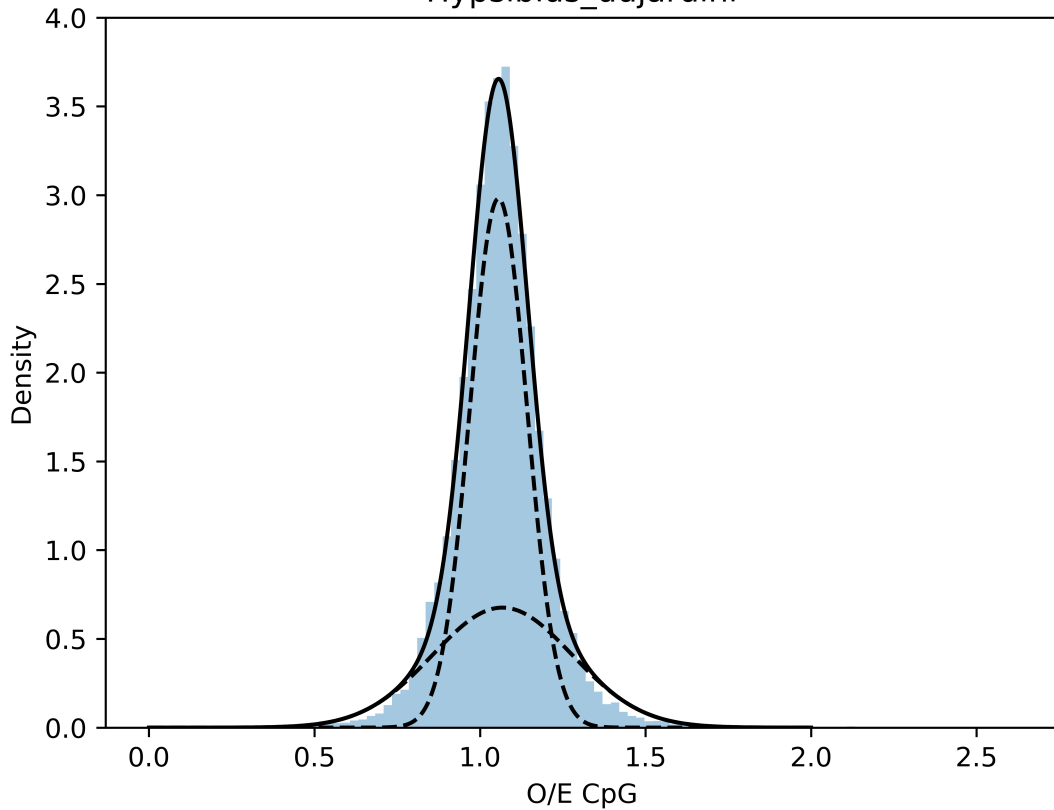



# Nippostrongylus\_brasiliensis

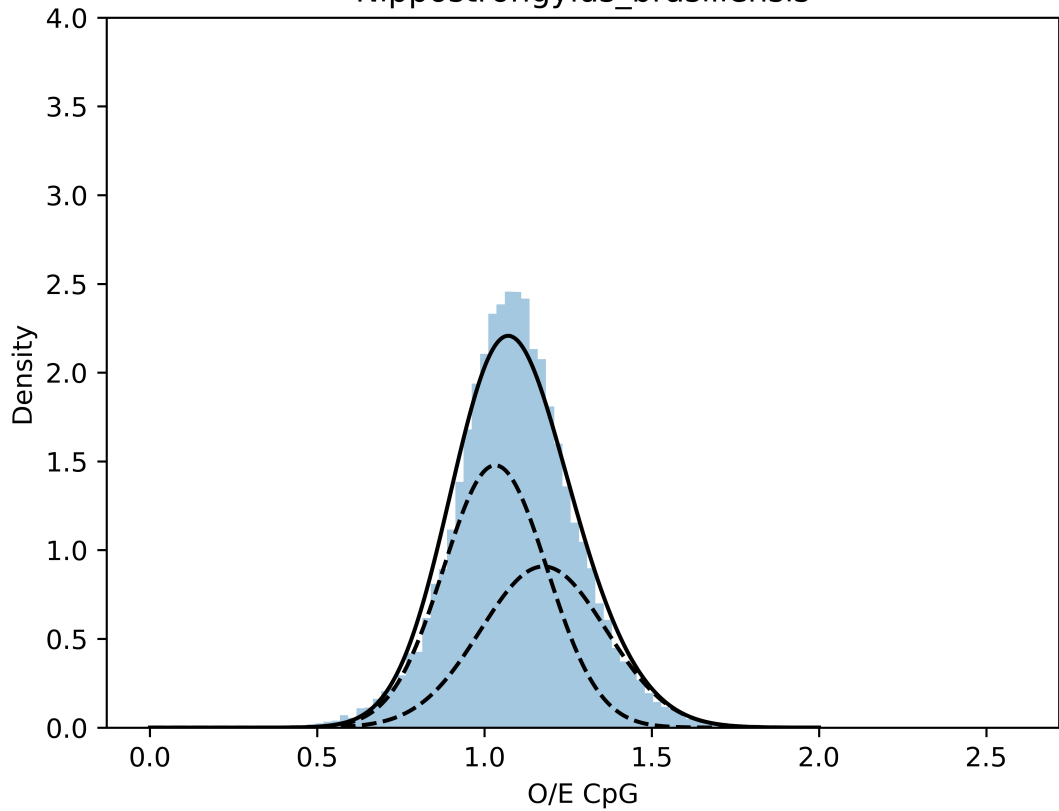

# Haemonchus\_contortus

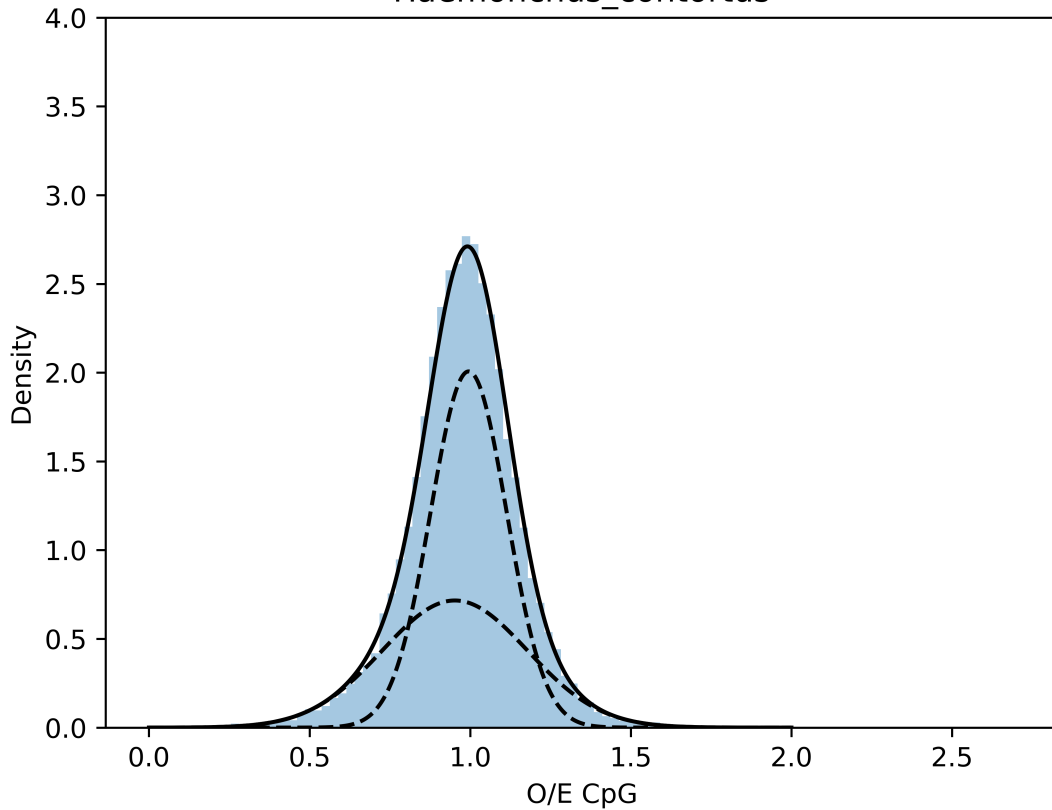

# Dictyocaulus\_viviparus

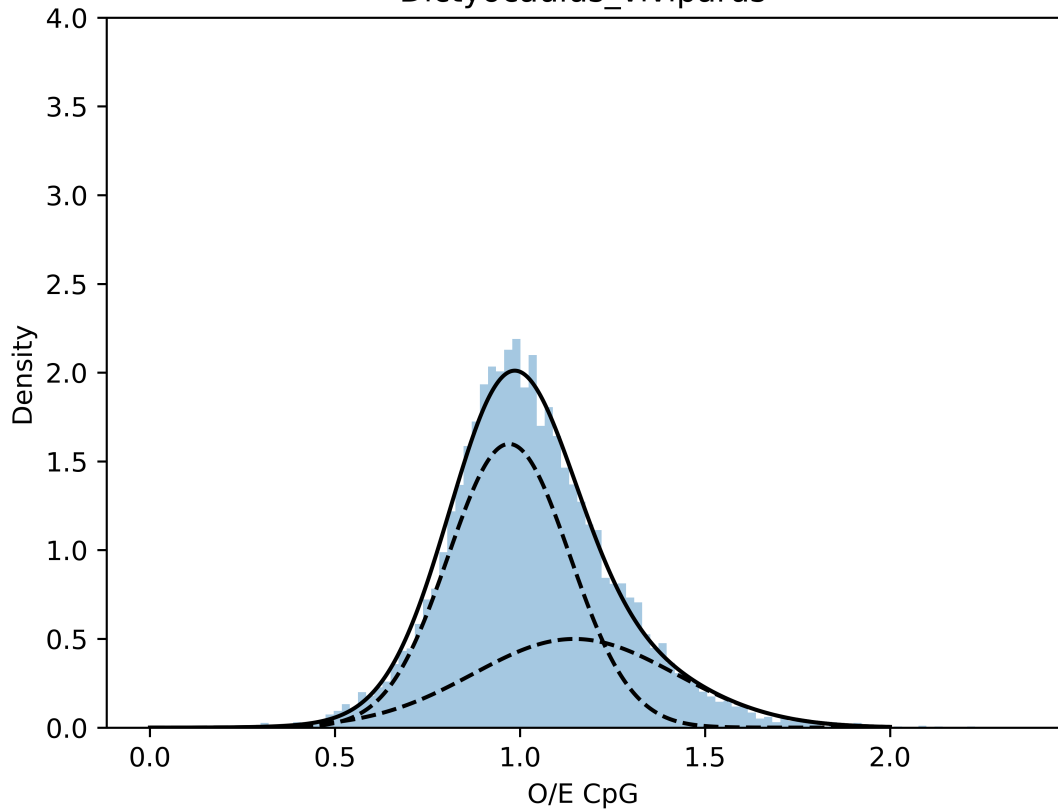

# Angiostrongylus\_cantonensis

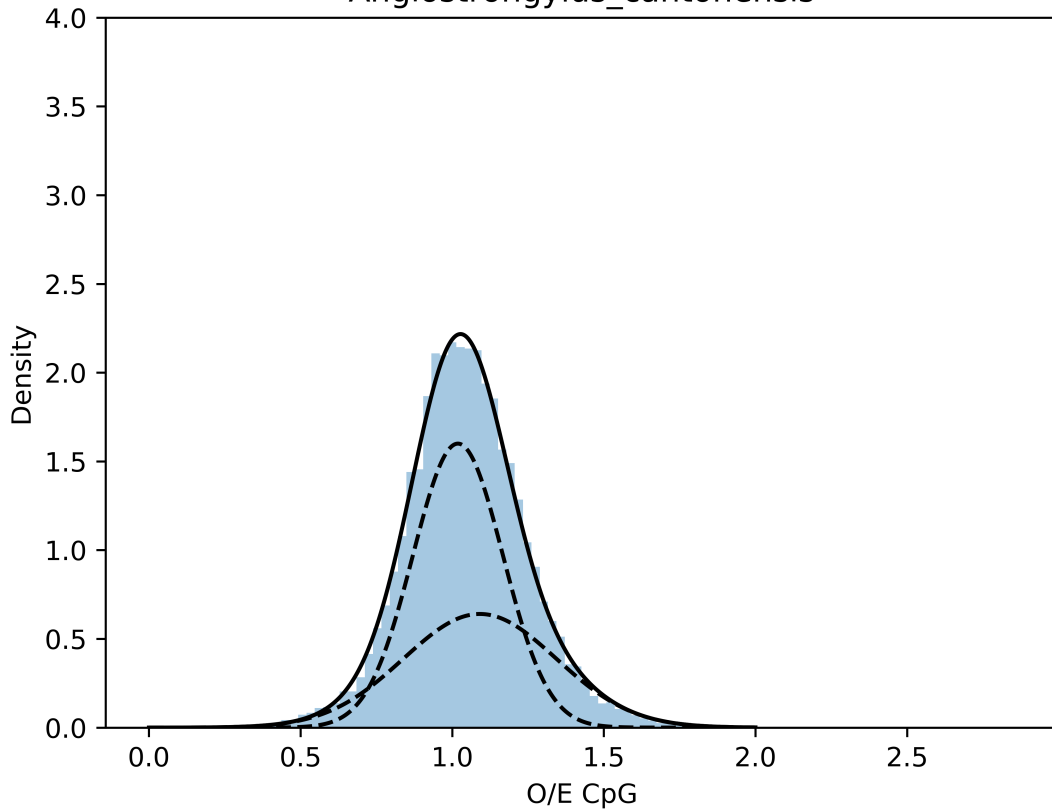

# Necator\_americanus

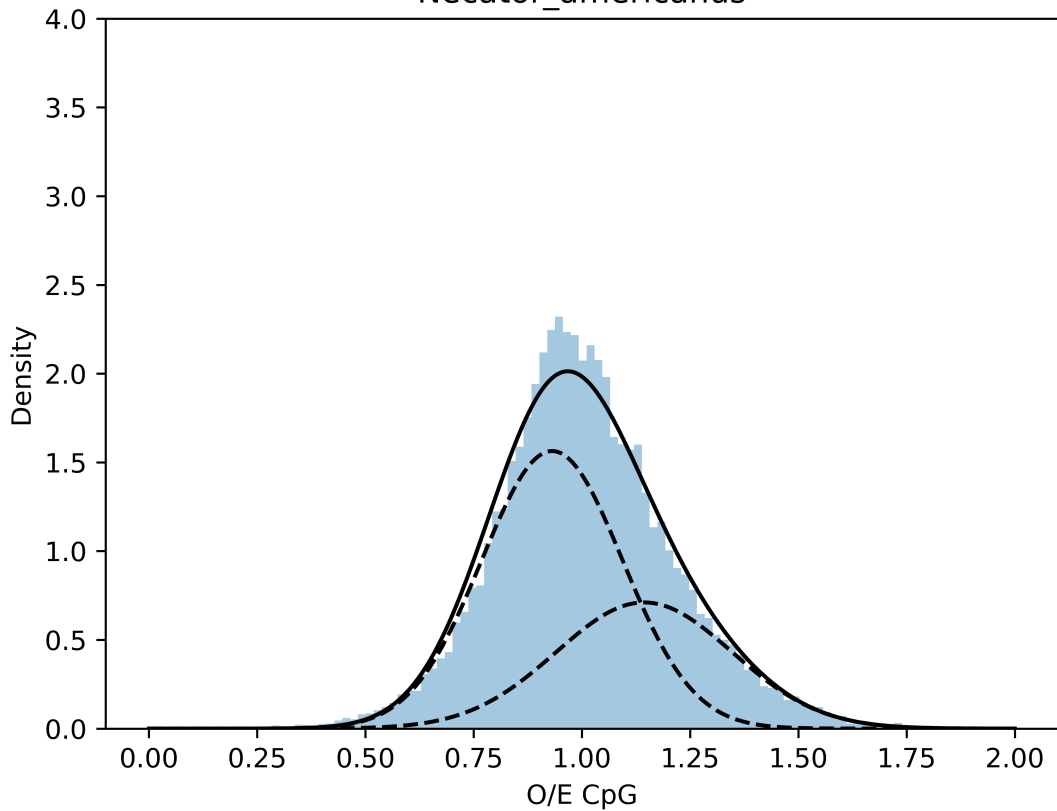

# Ancylostoma\_ceylanicum

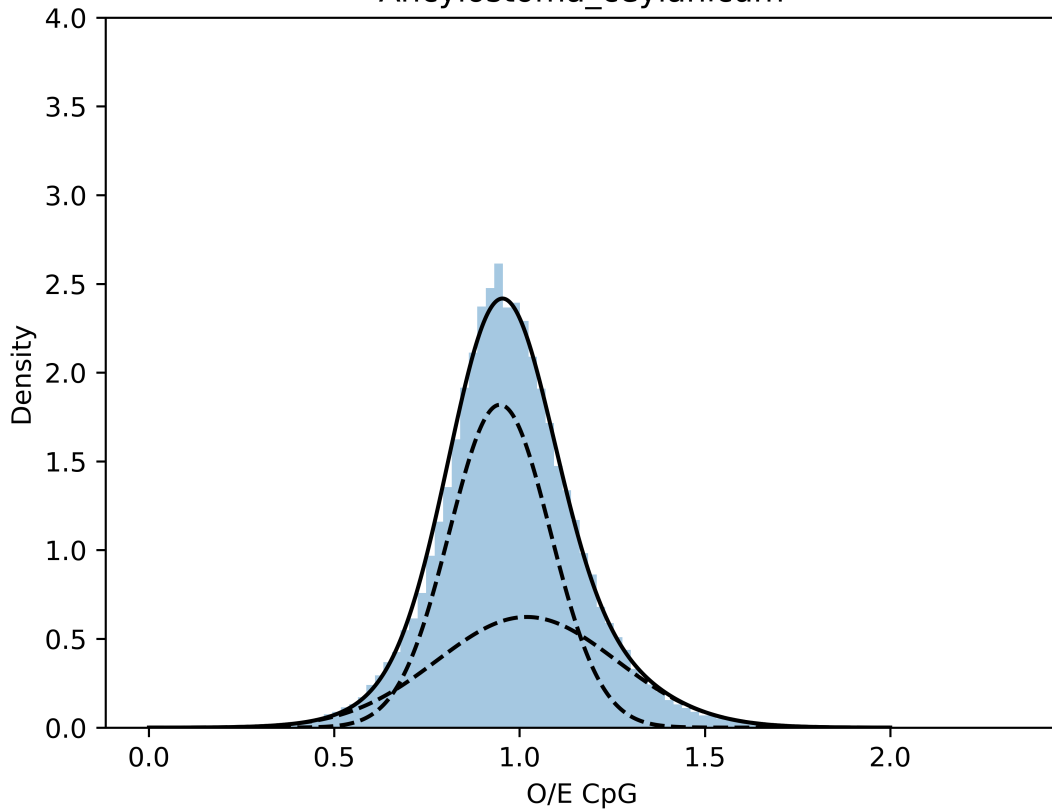

# Caenorhabditis\_briggsae

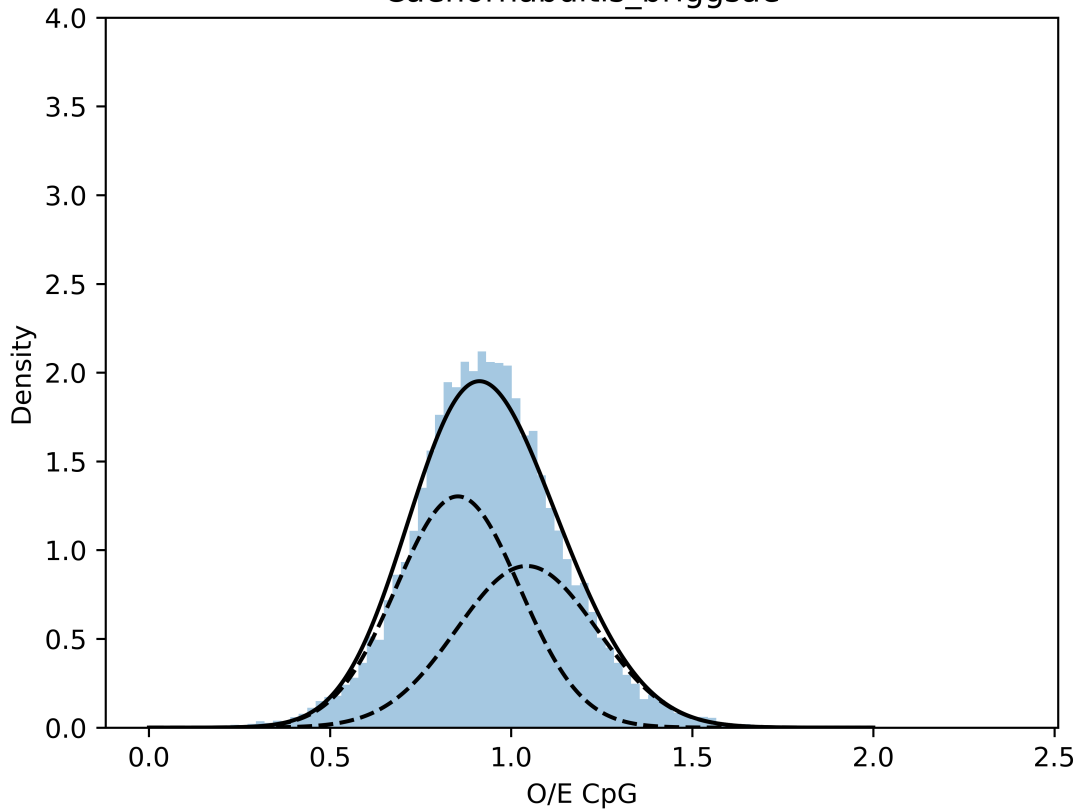

# Caenorhabditis\_remanei

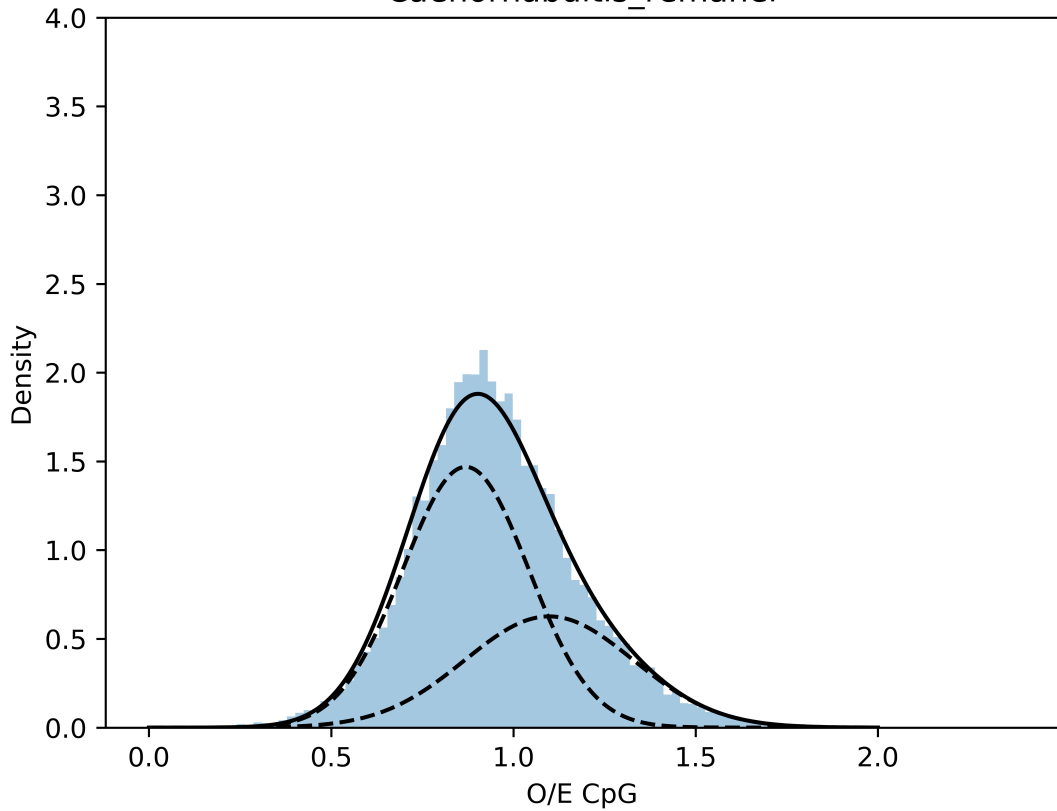



# Caenorhabditis\_brenneri

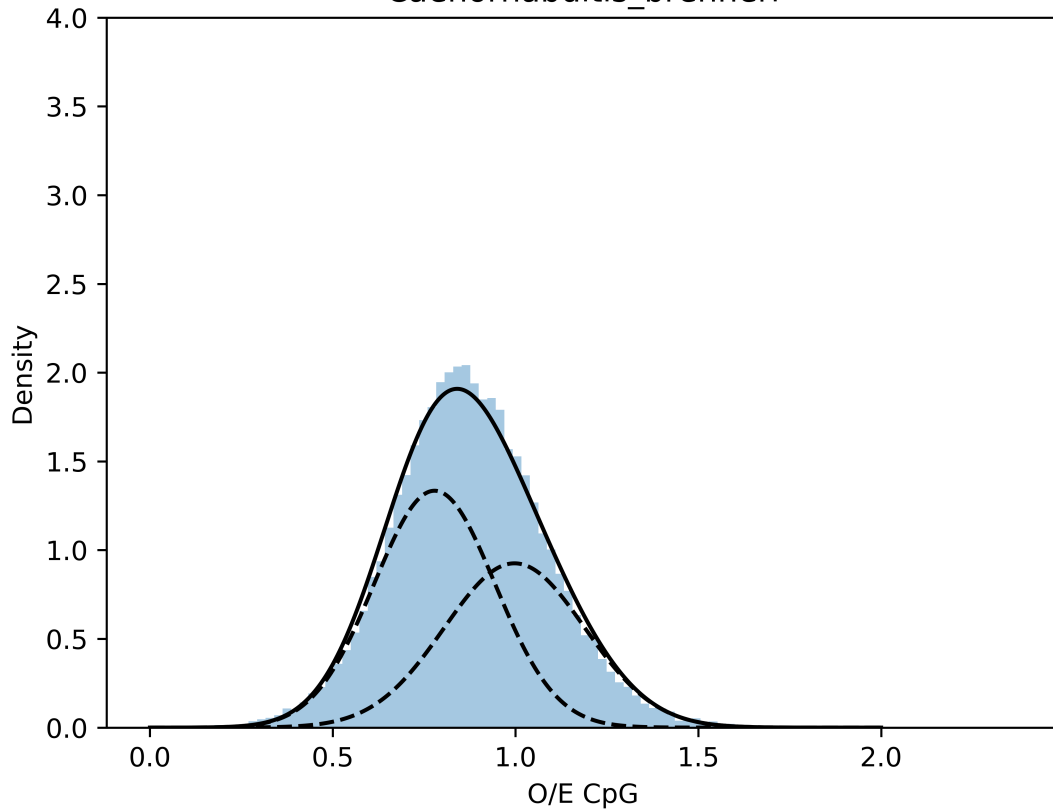

# Caenorhabditis\_elegans

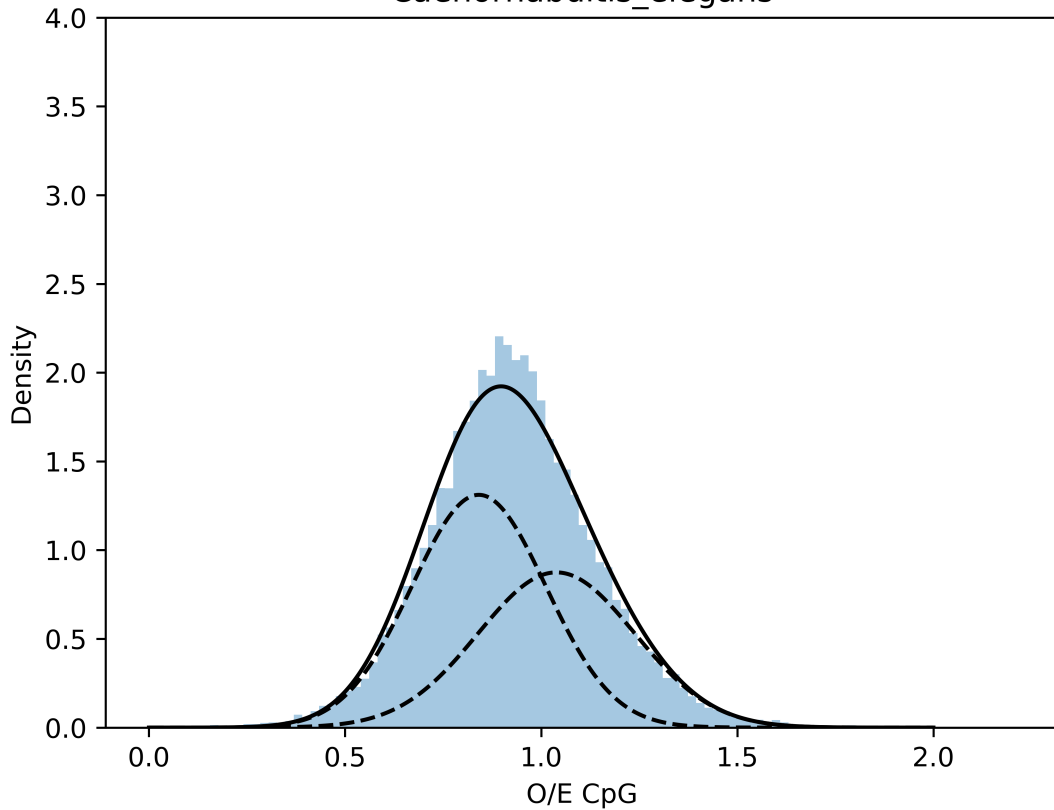

# Caenorhabditis\_japonica

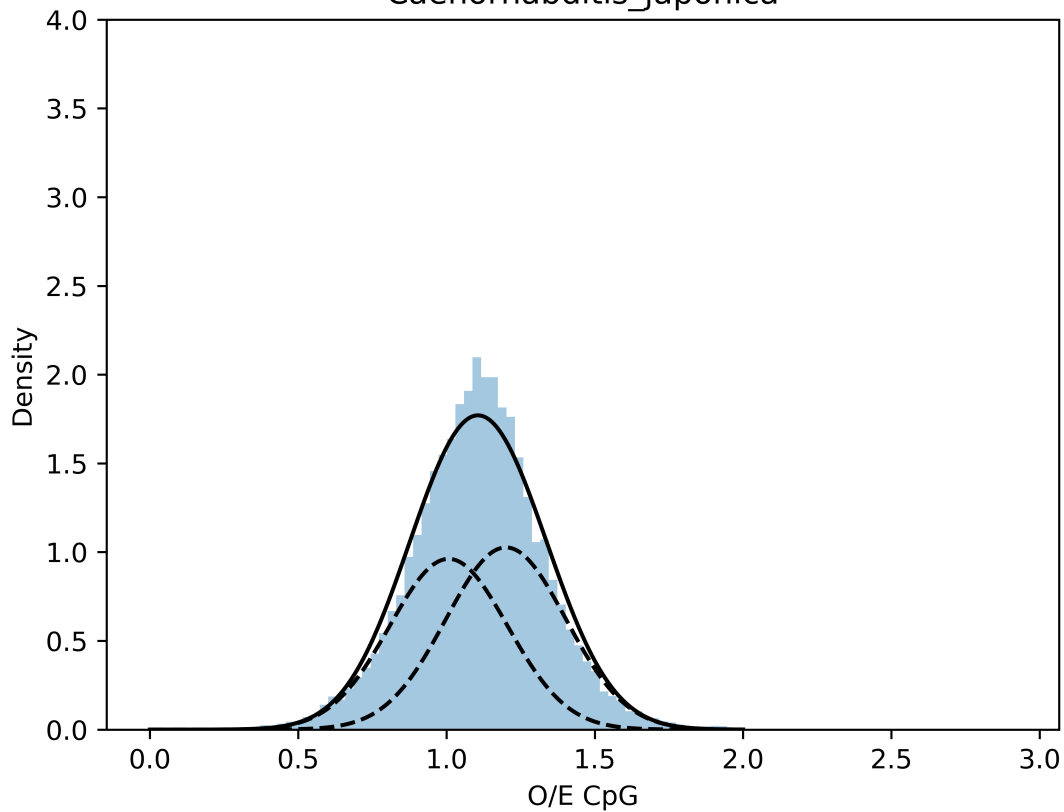

# Caenorhabditis\_angaria

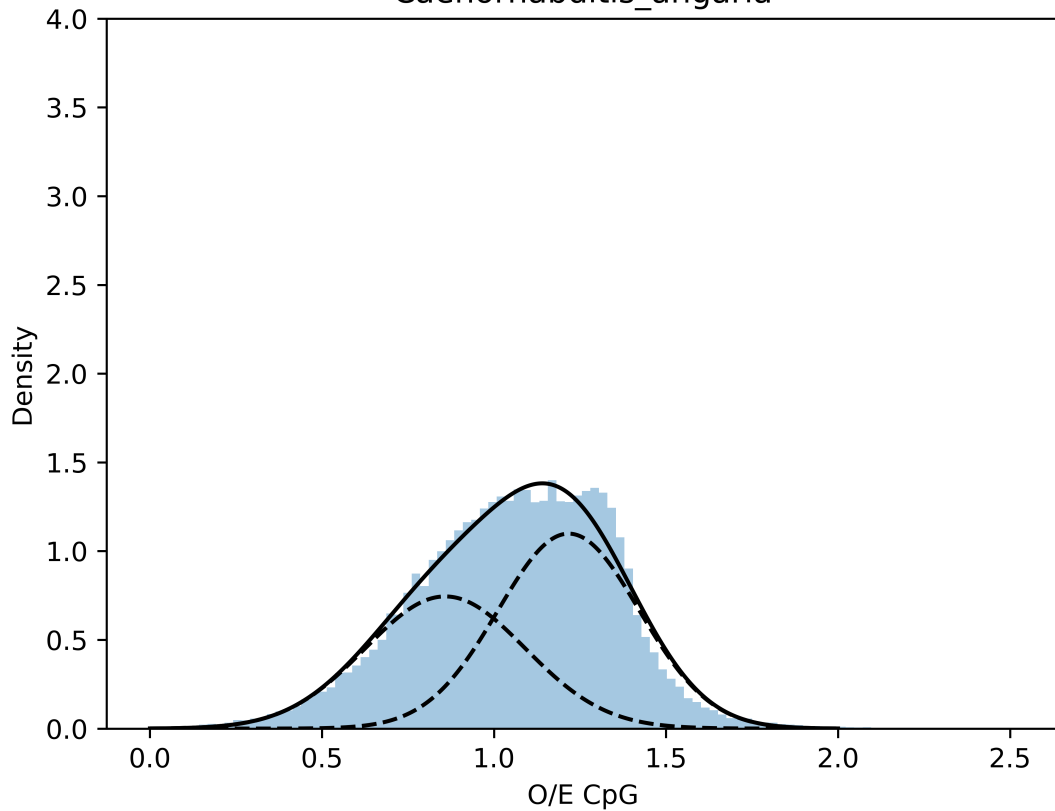

# Diploscapter\_coronatus

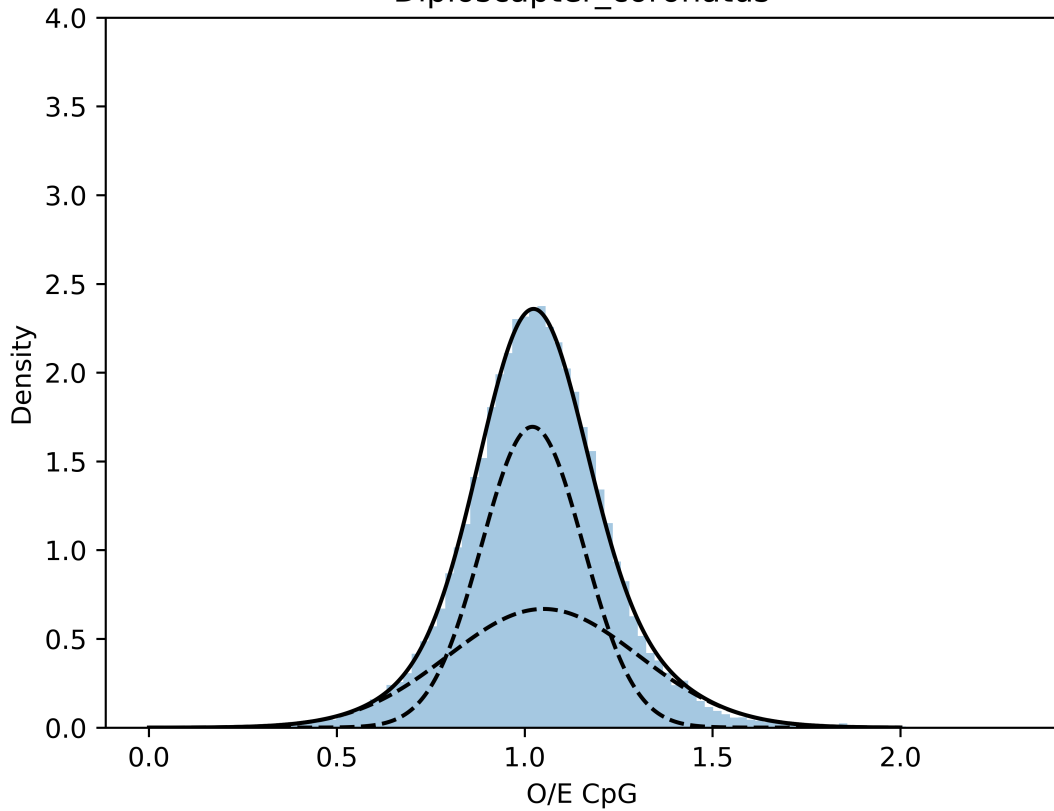

# Diploscapter\_pachys

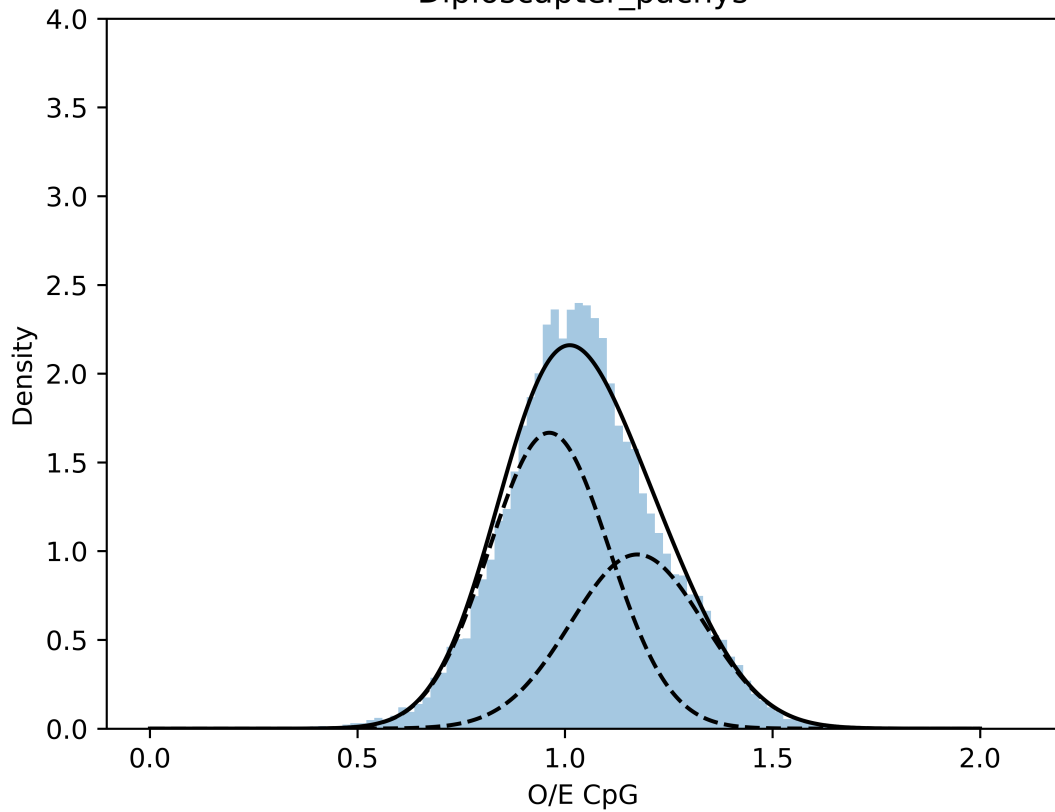

# Pristionchus\_pacificus

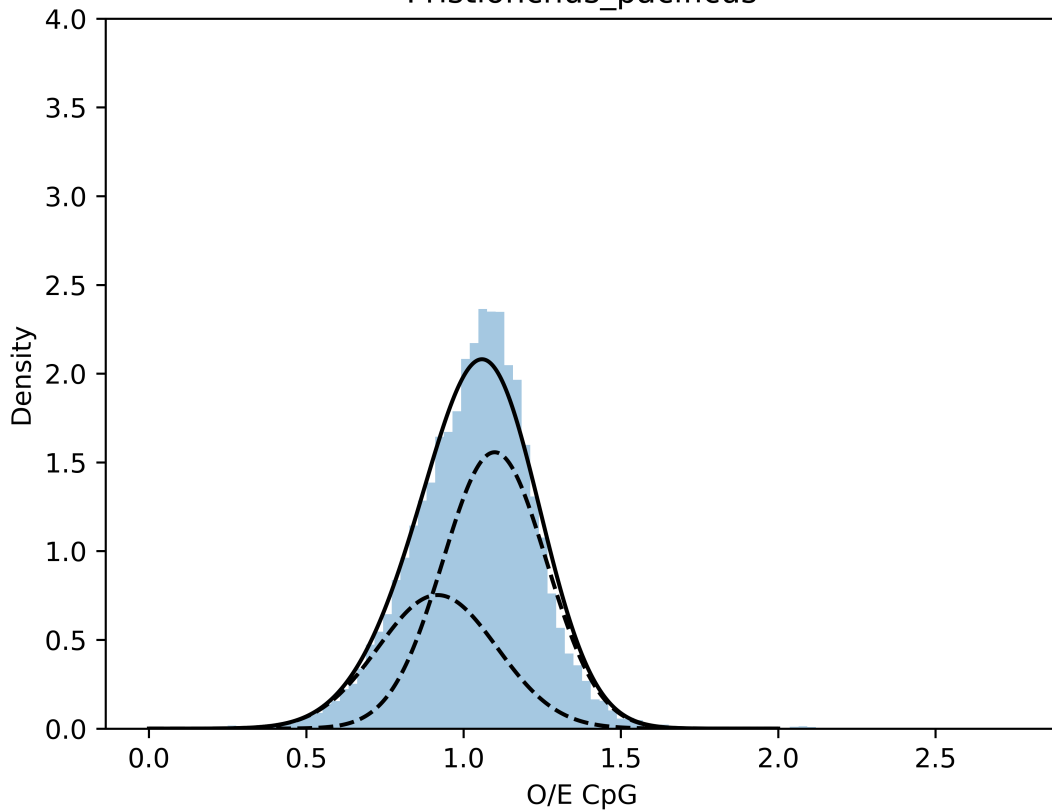

# Syphacia\_muris

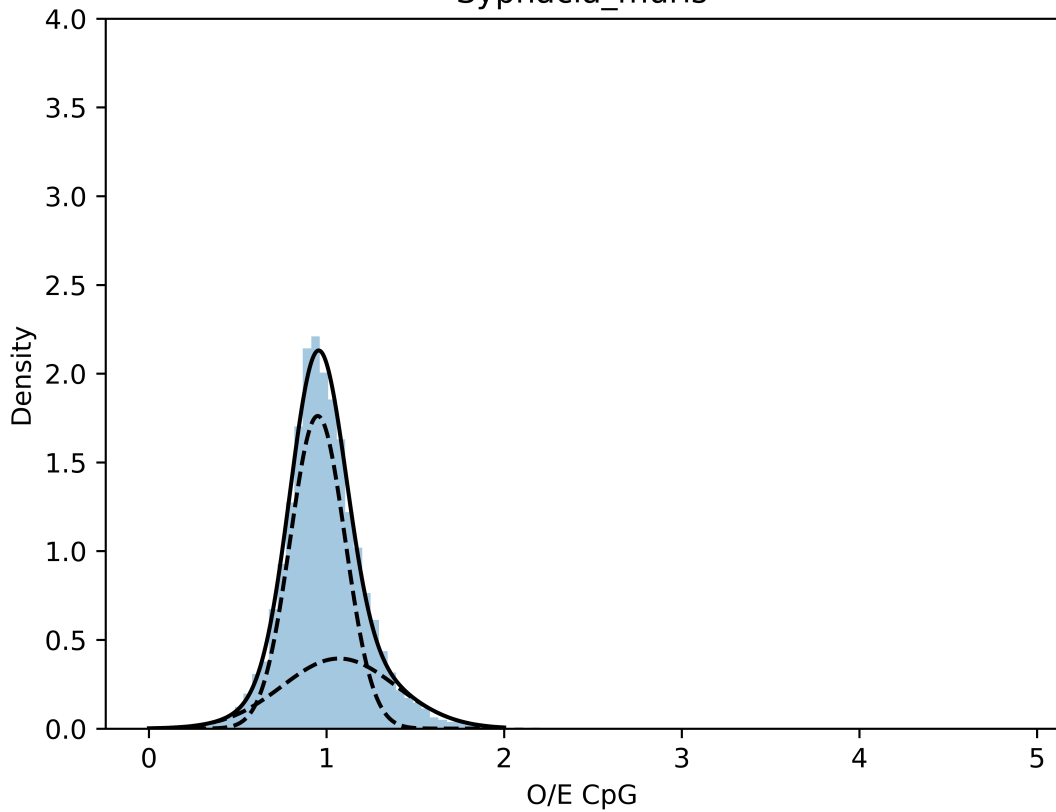



# Ascaris\_suum

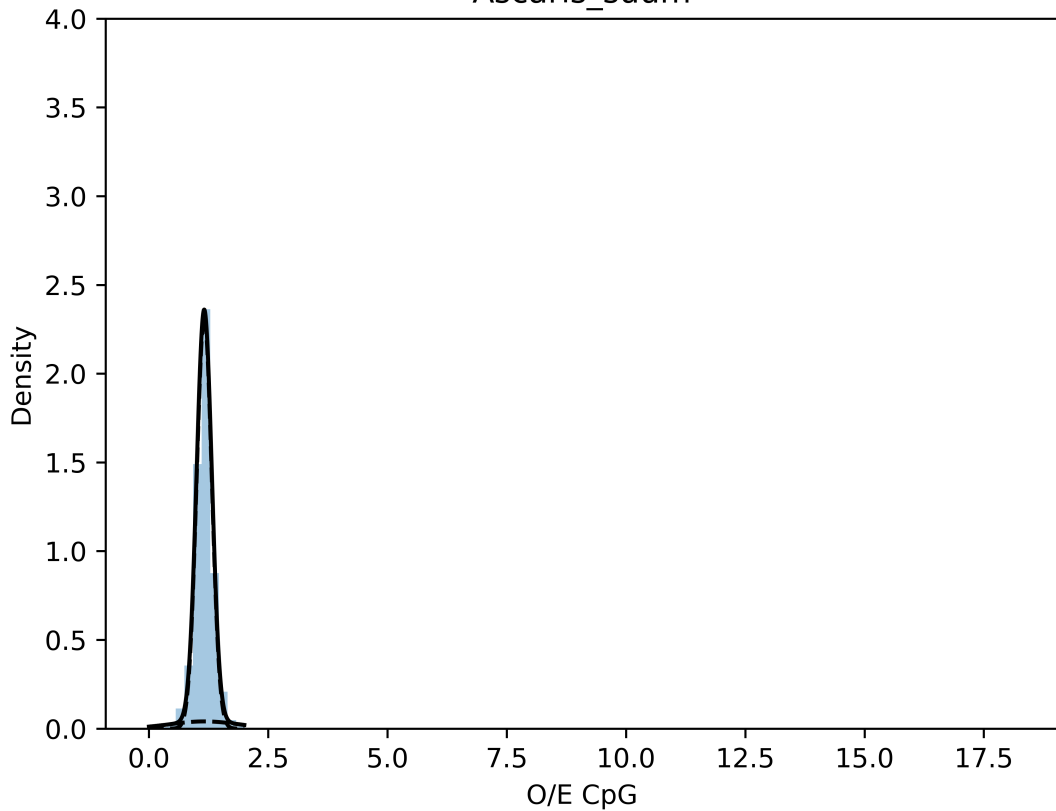

# Toxocara\_canis

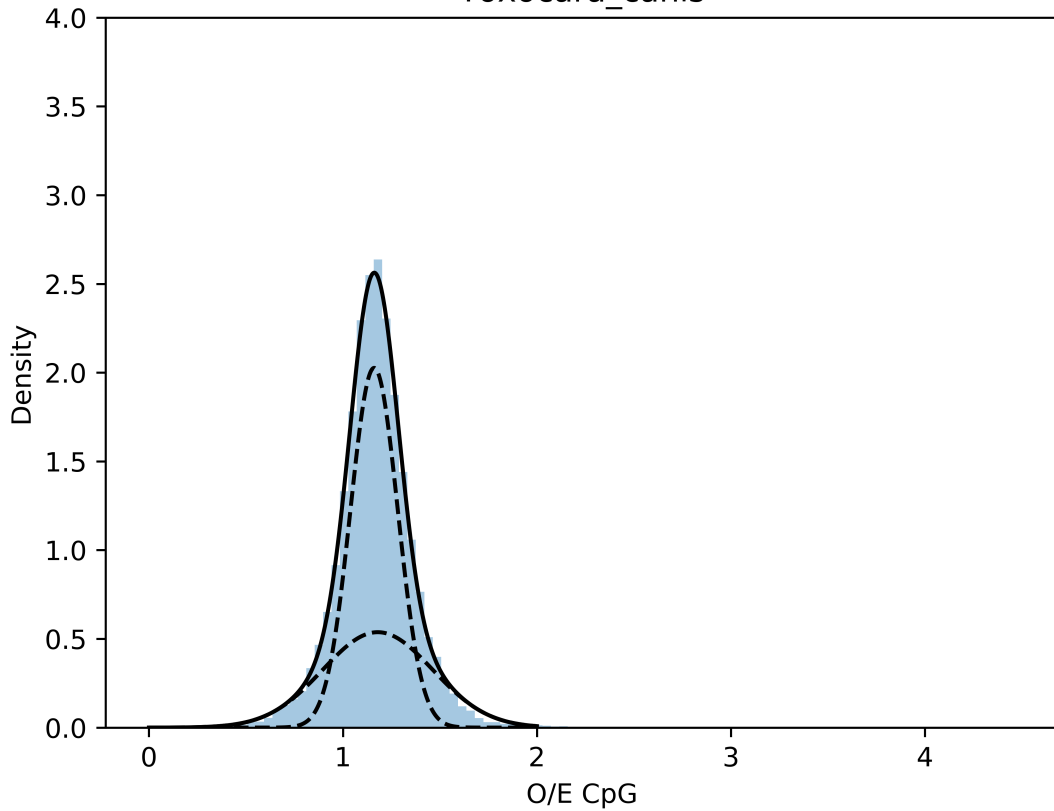

# Litomosoides\_sigmodontis

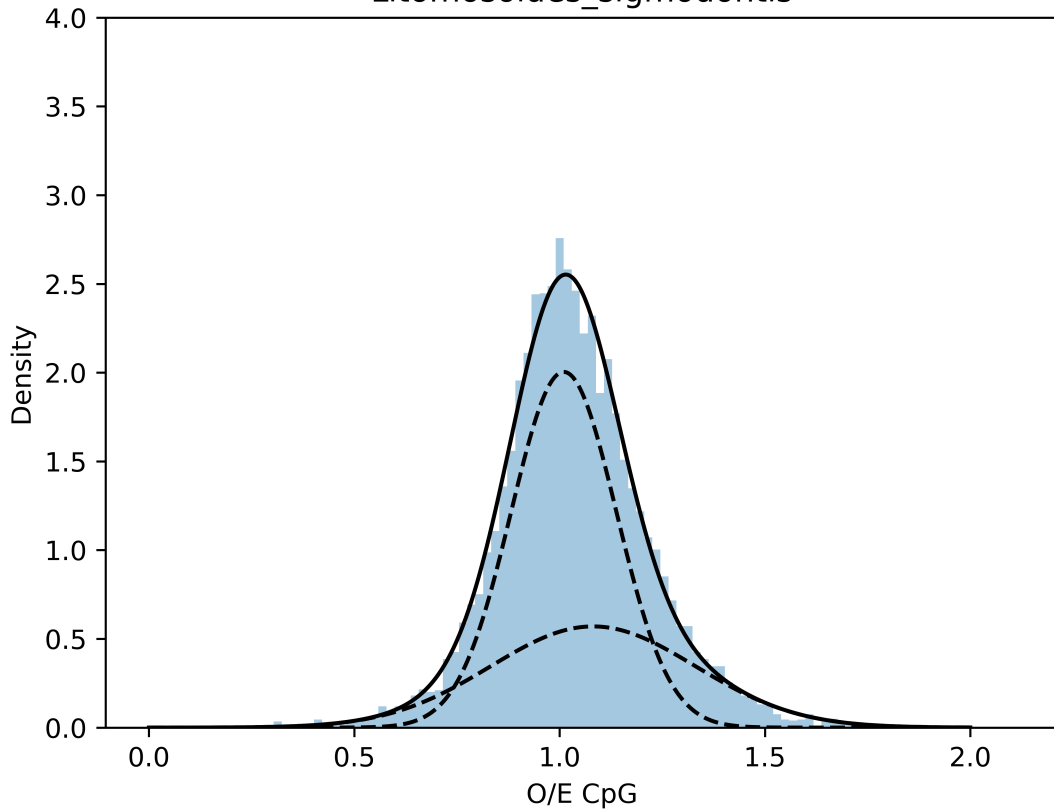

# Brugia\_malayi

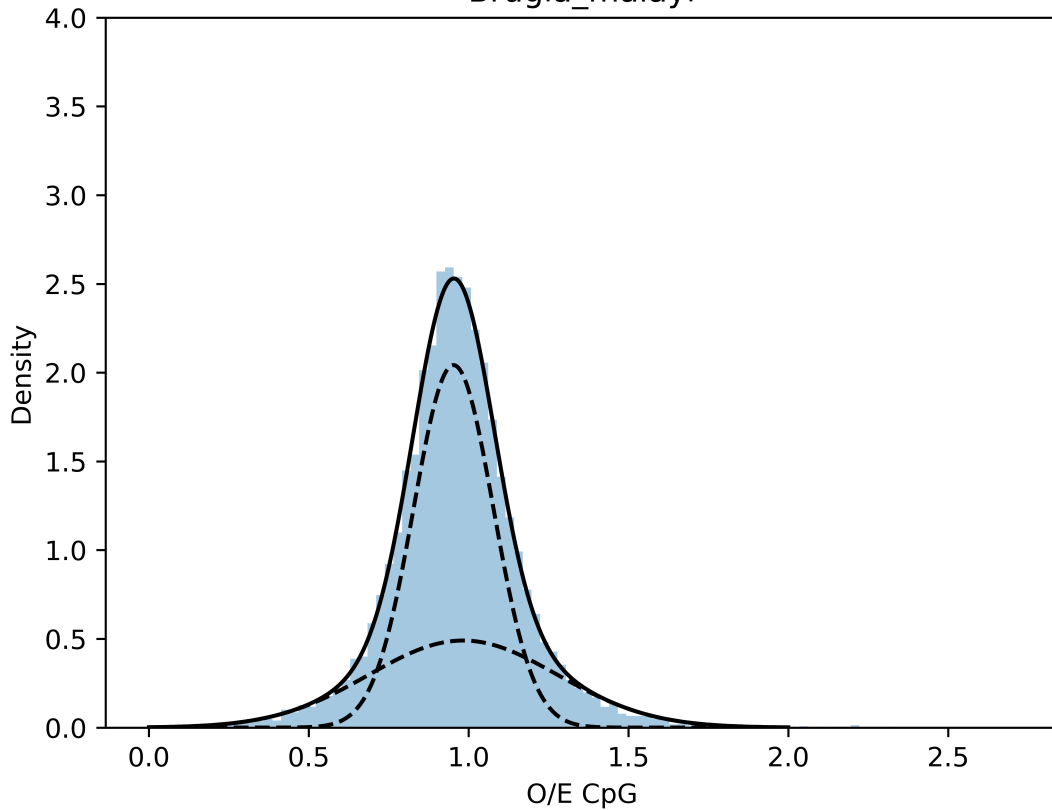

Loa\_loa

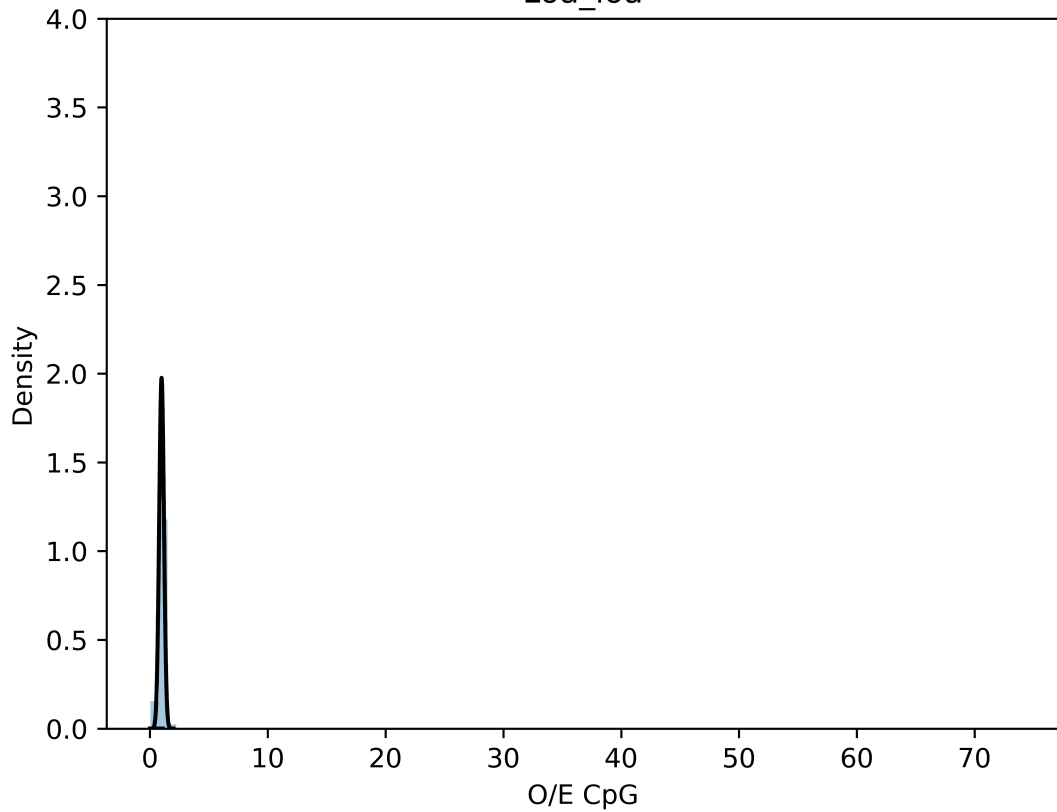

# *Dirofilaria immitis*

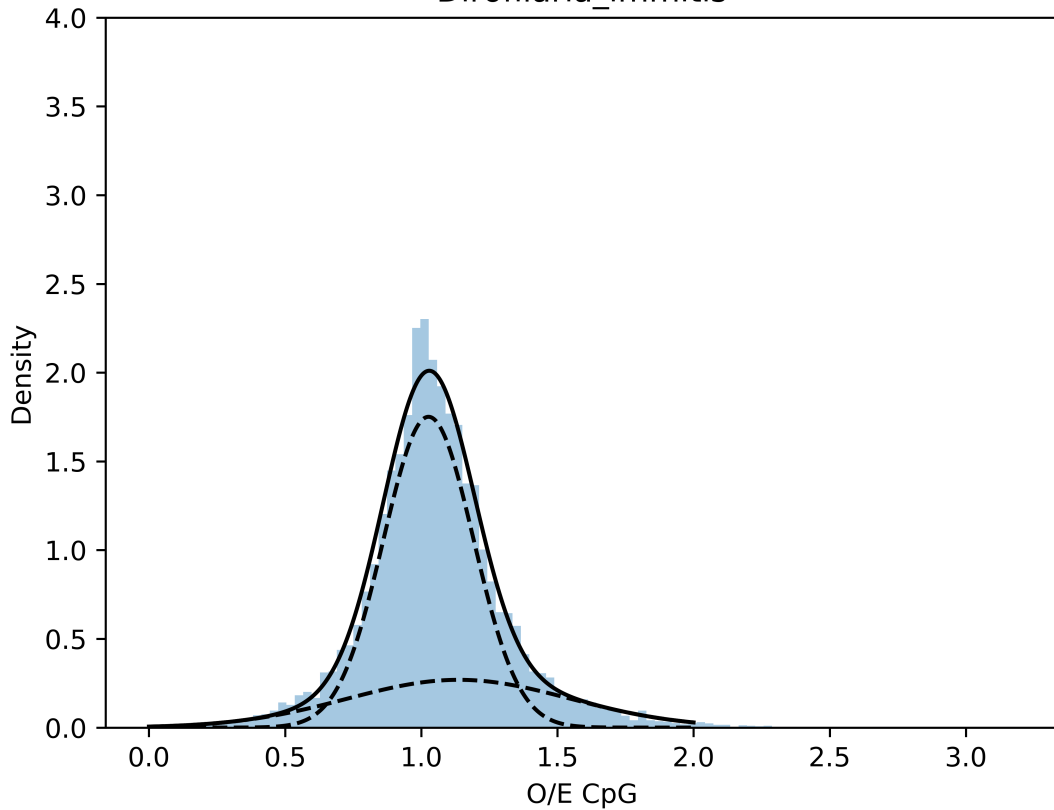

# Onchocerca\_volvulus

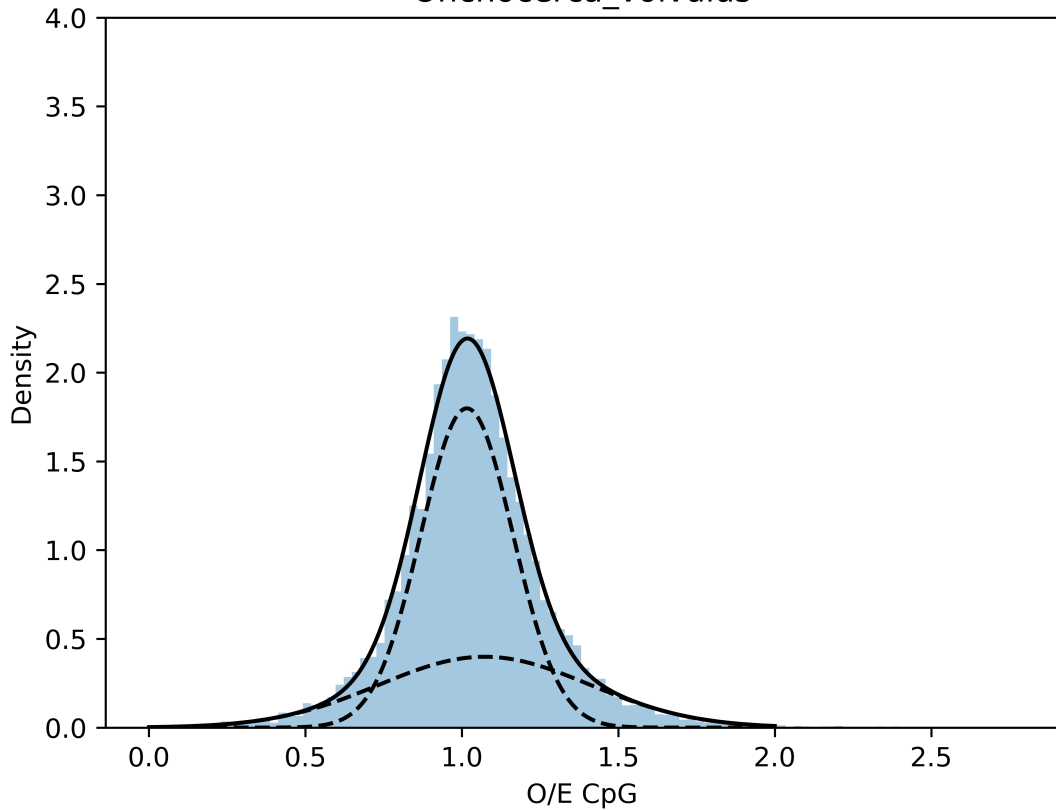

# Thelazia\_callipaeda

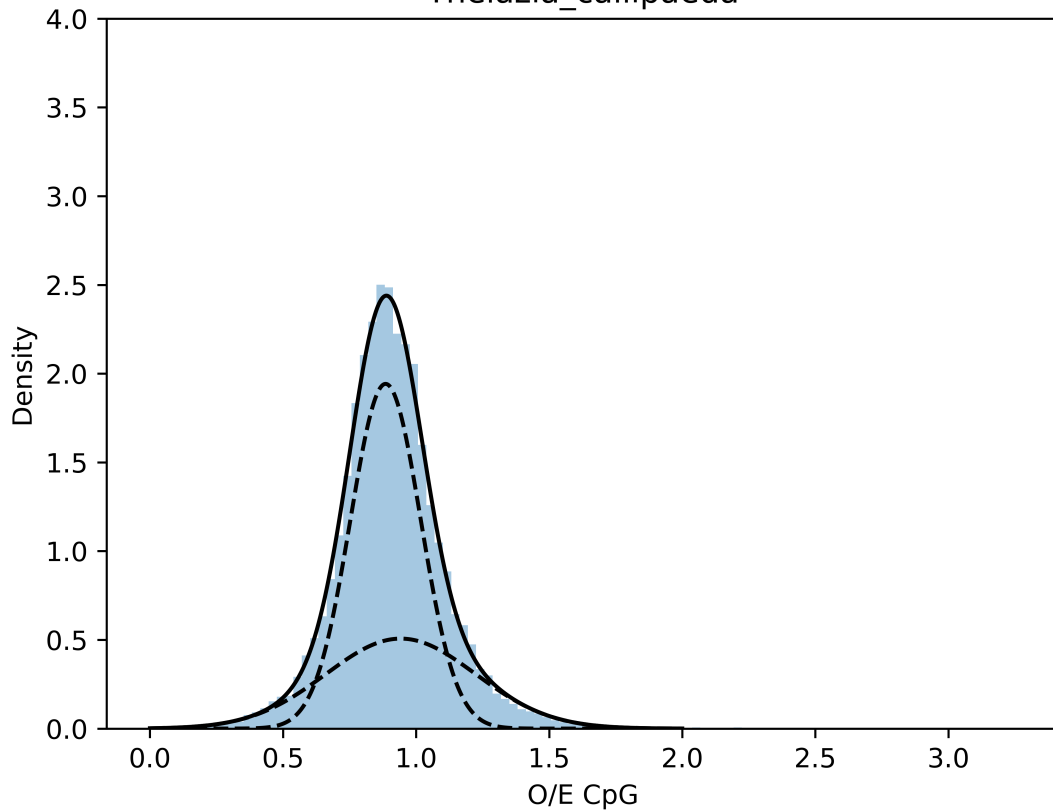



# Dracunculus\_medinensis

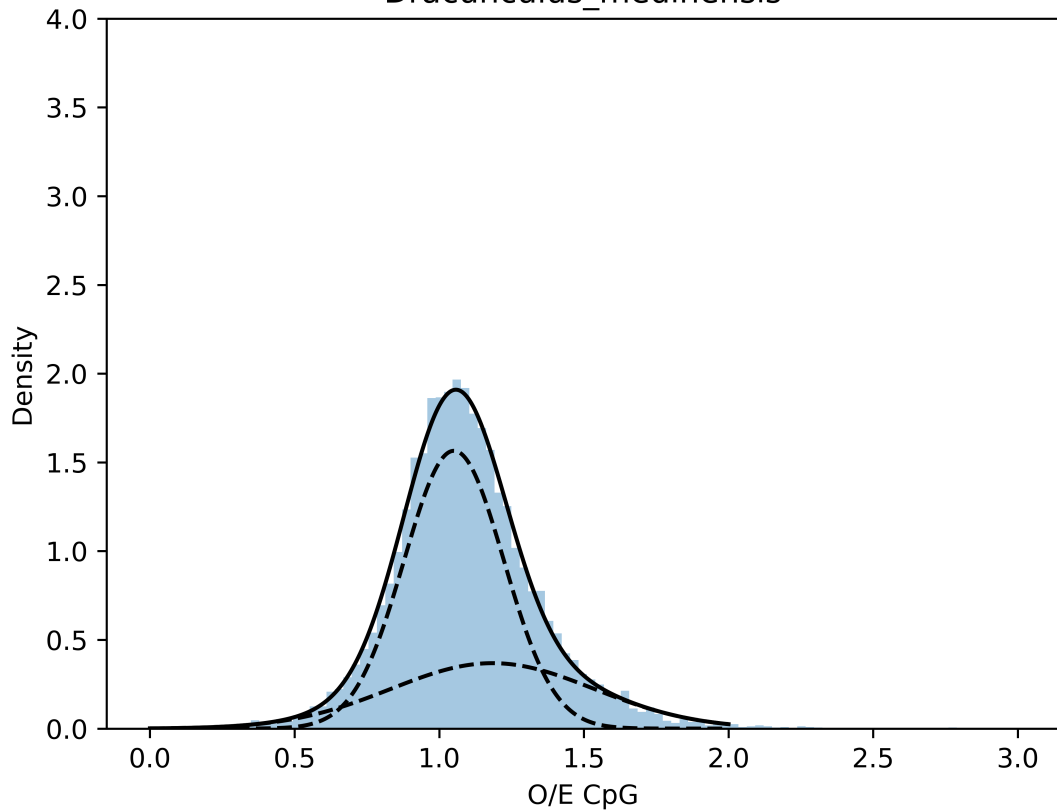

# Rhabditophanes\_sp\_KR3021

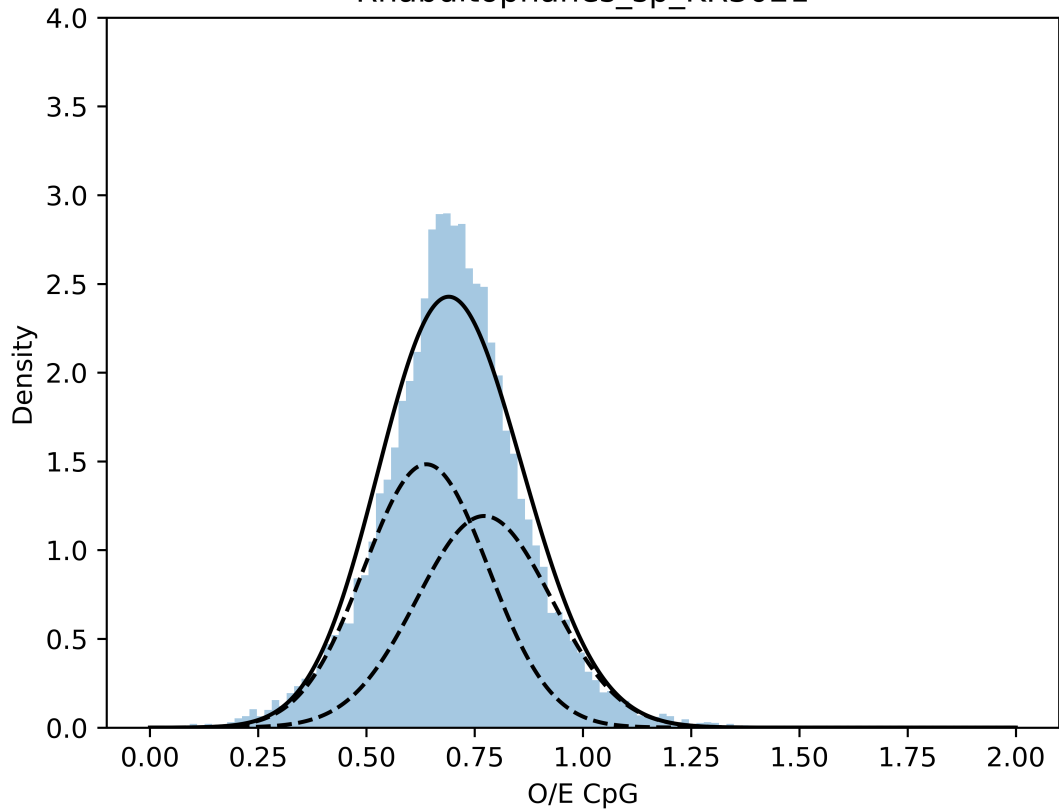

# Strongyloides\_ratti

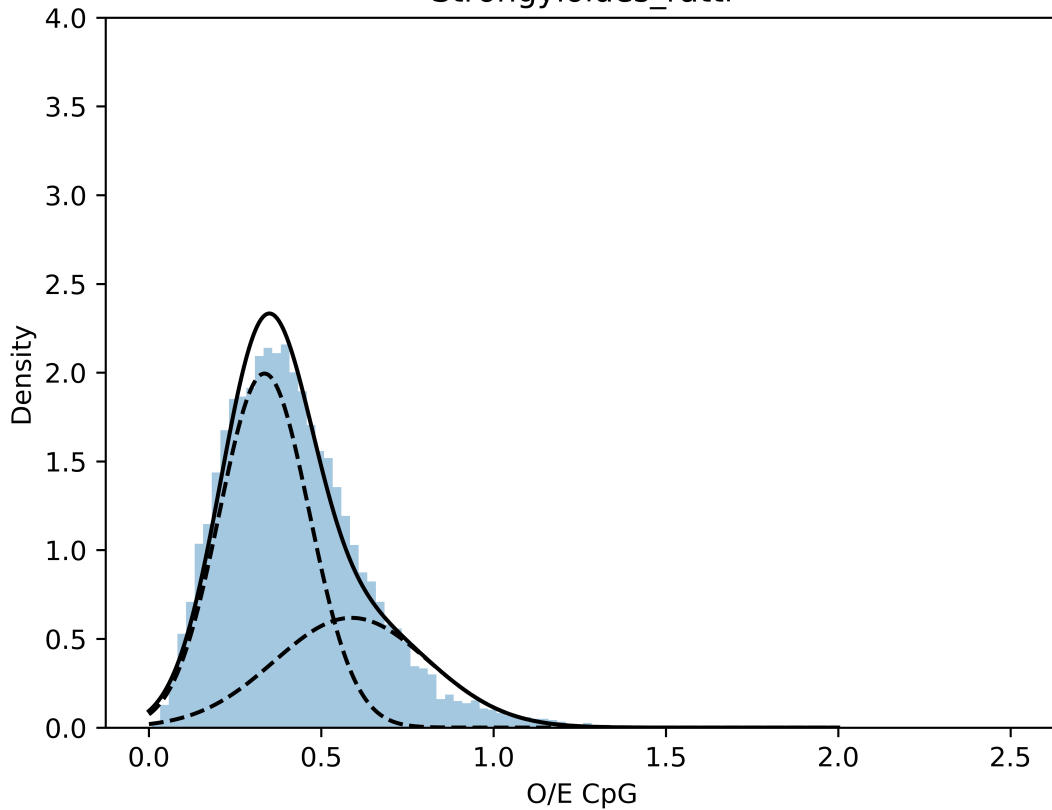

# Panagrellus\_redivivus

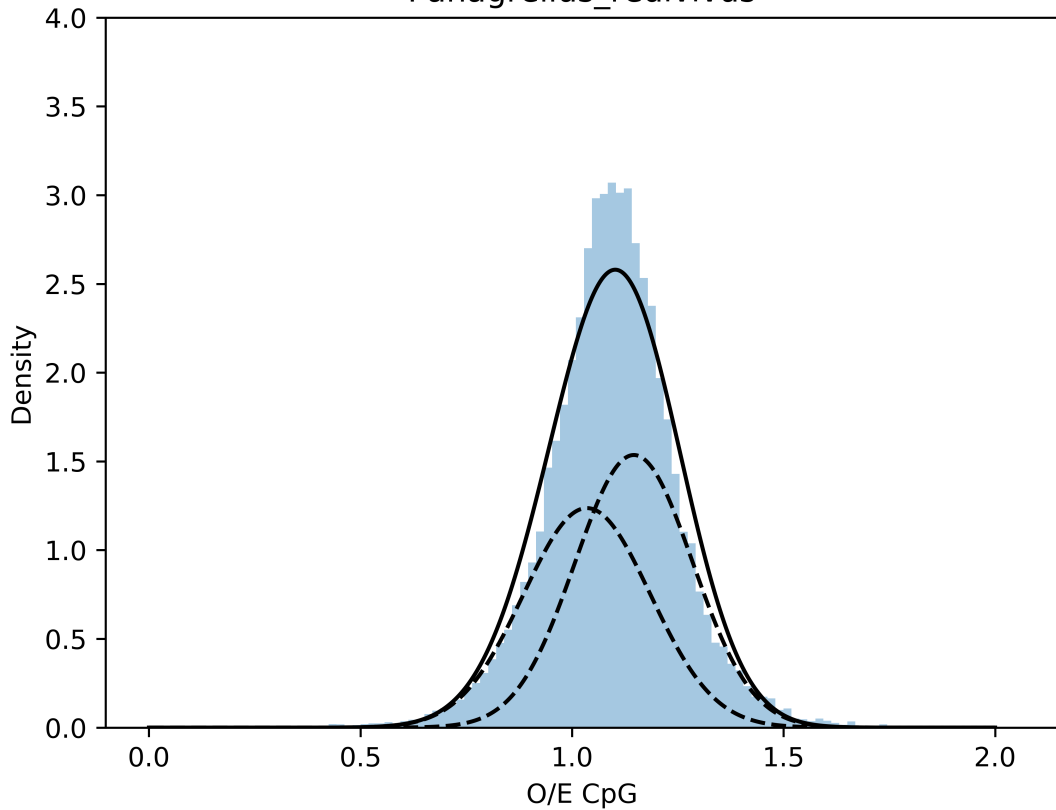

# Bursaphelenchus\_xylophilus

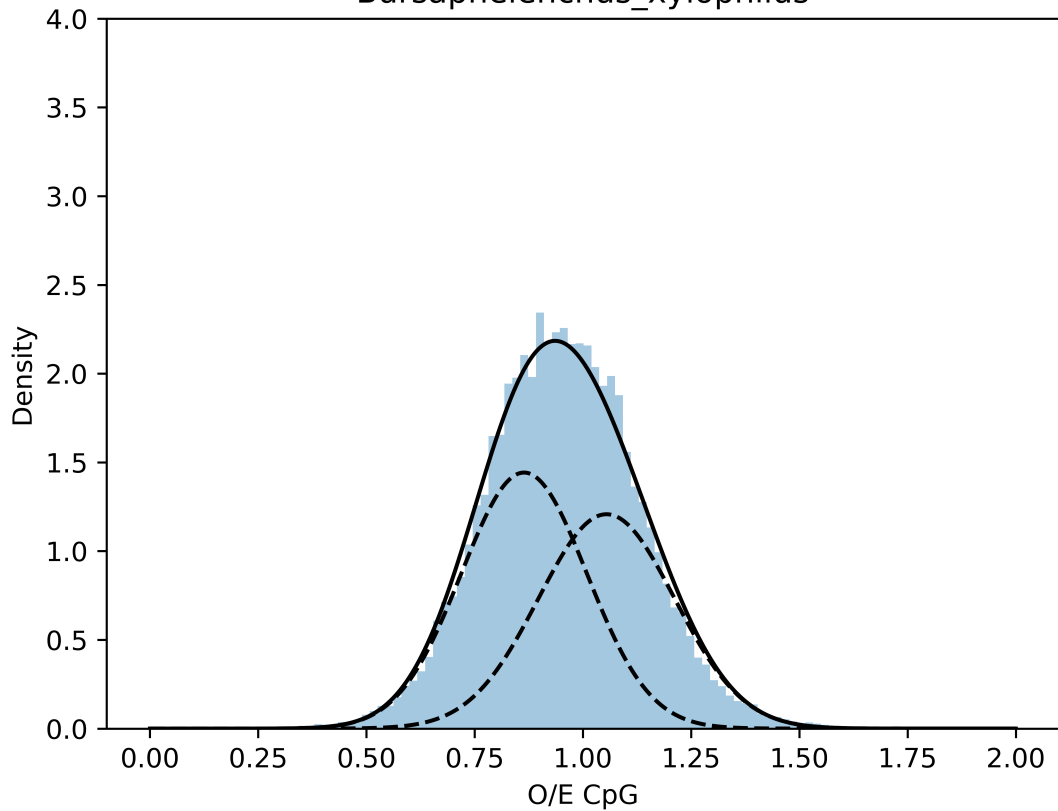

# Meloidogyne\_hapla

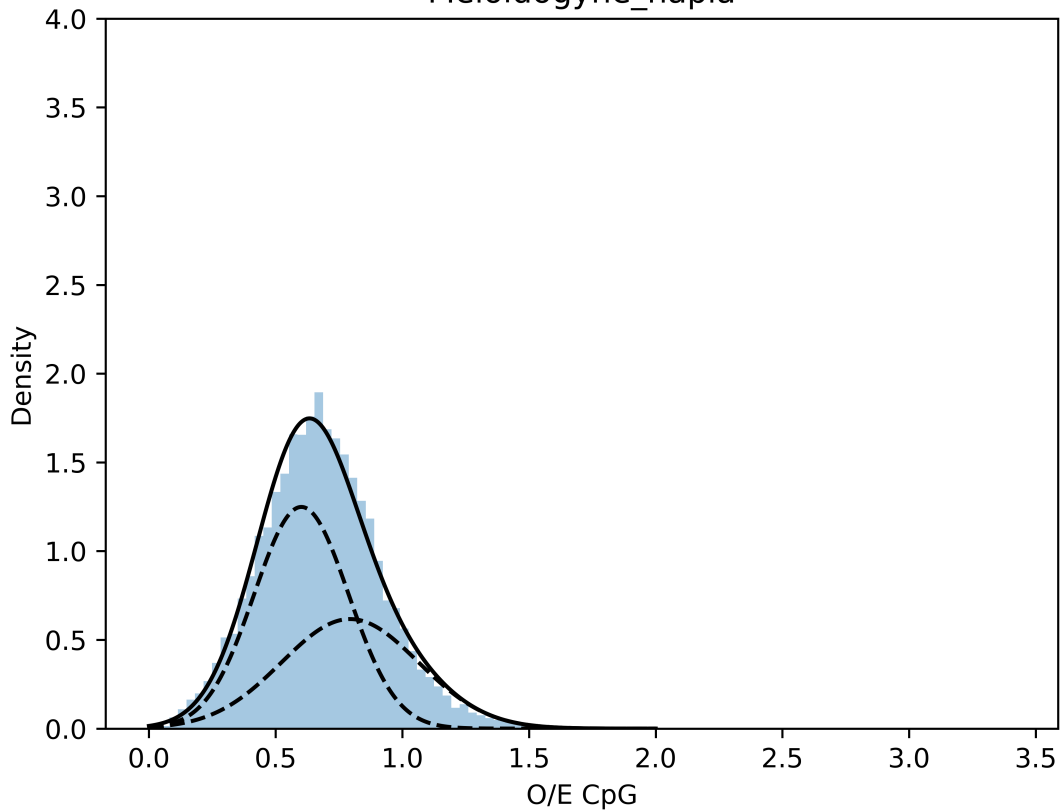

# Globodera\_pallida

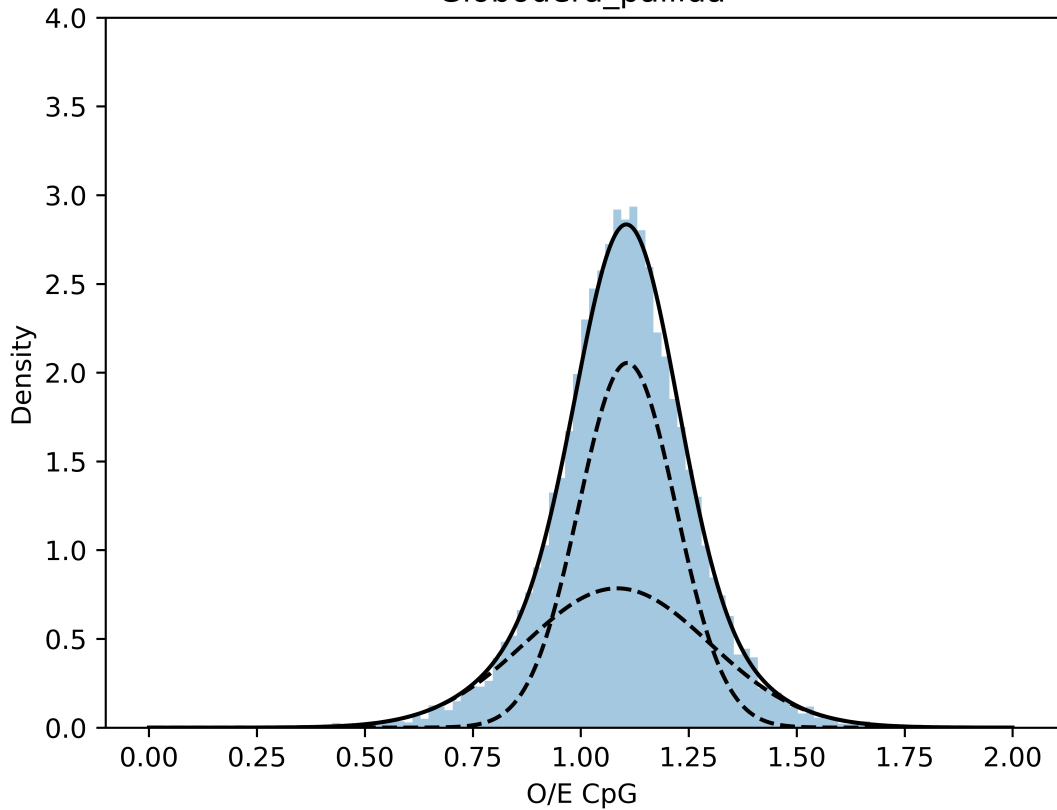

# Plectus\_sambesii

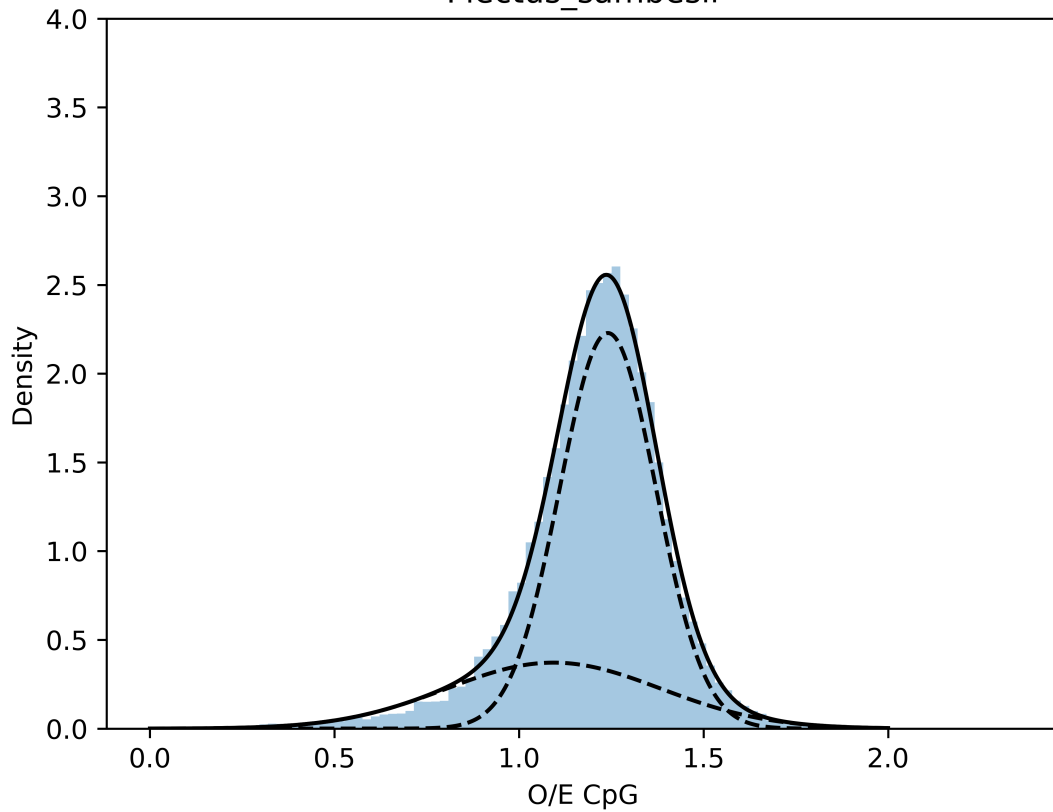



# Romanomermis\_culicivorax

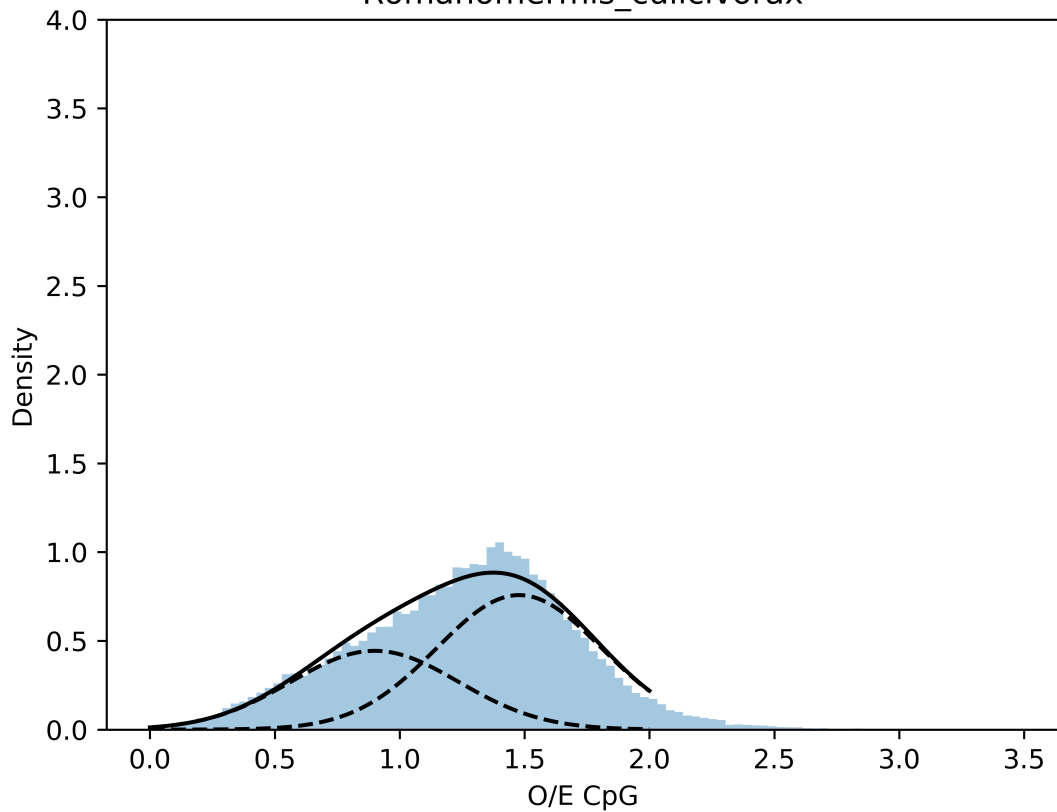

# Trichinella\_spiralis

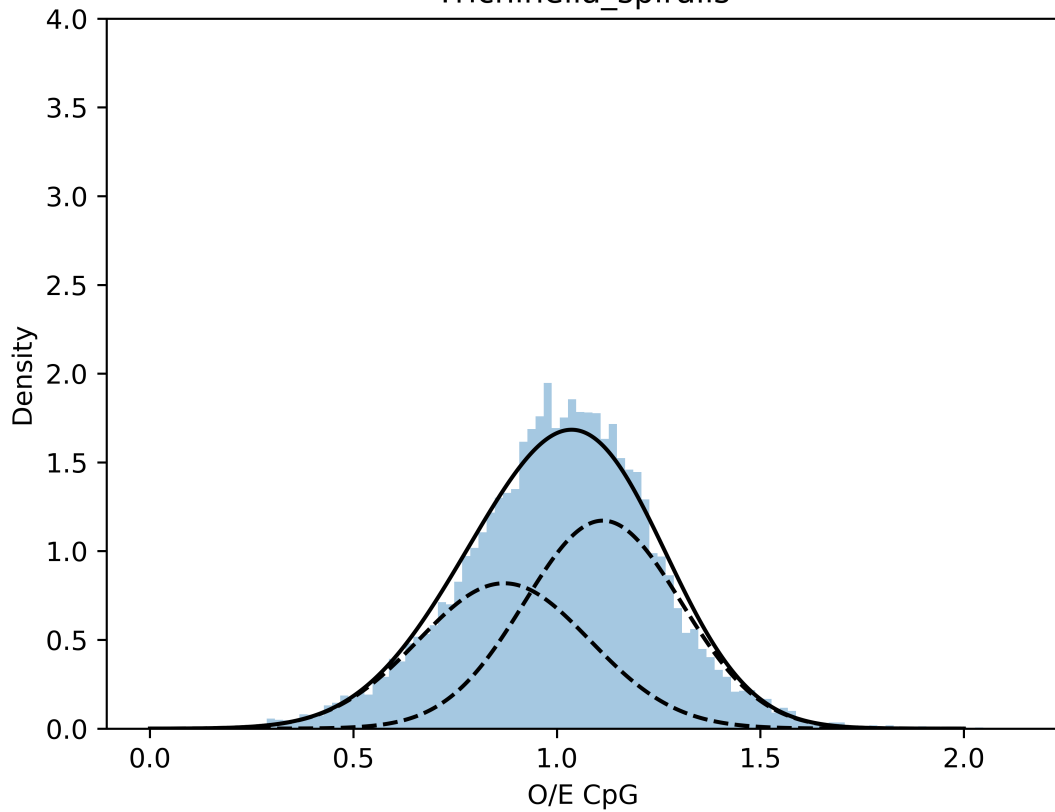

# Trichinella\_nelsoni

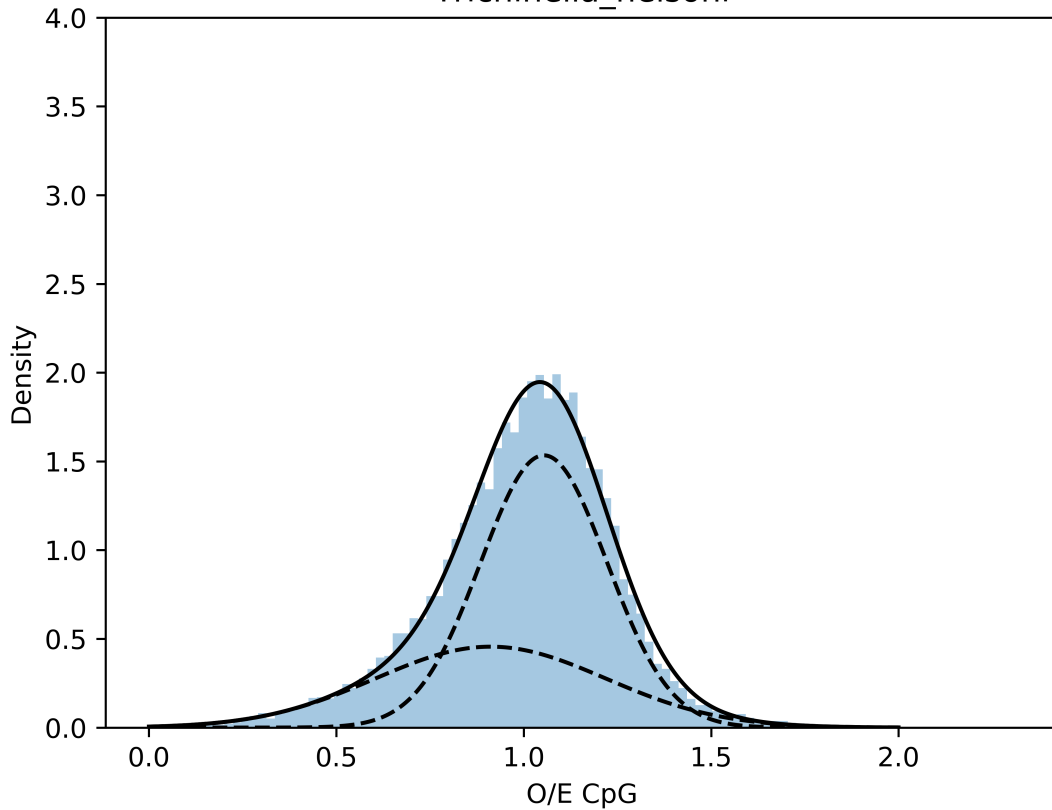

# Trichinella\_britovi

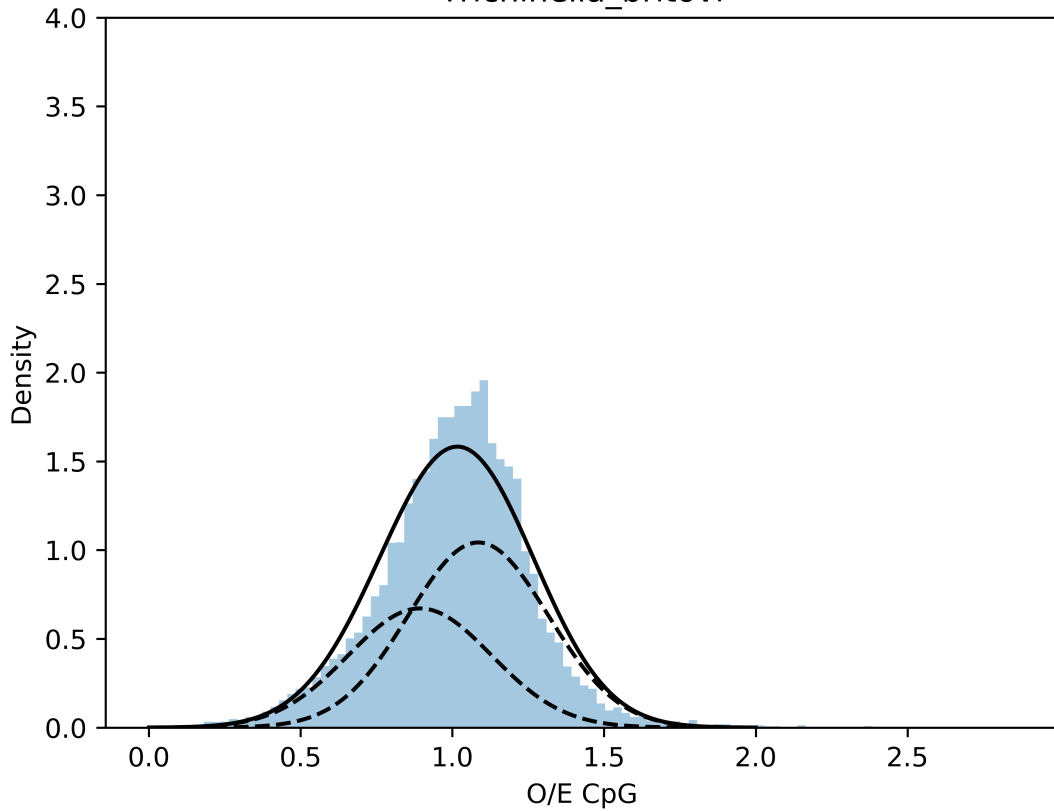

# Trichuris\_muris

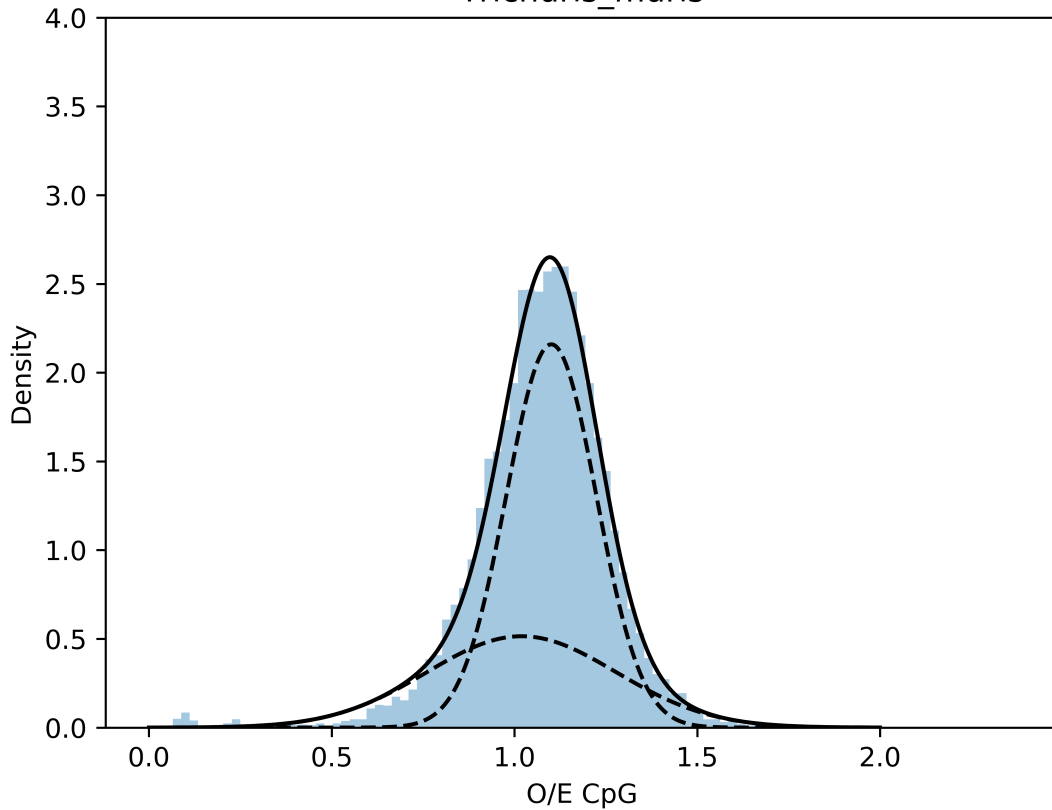

# Trichuris\_suis

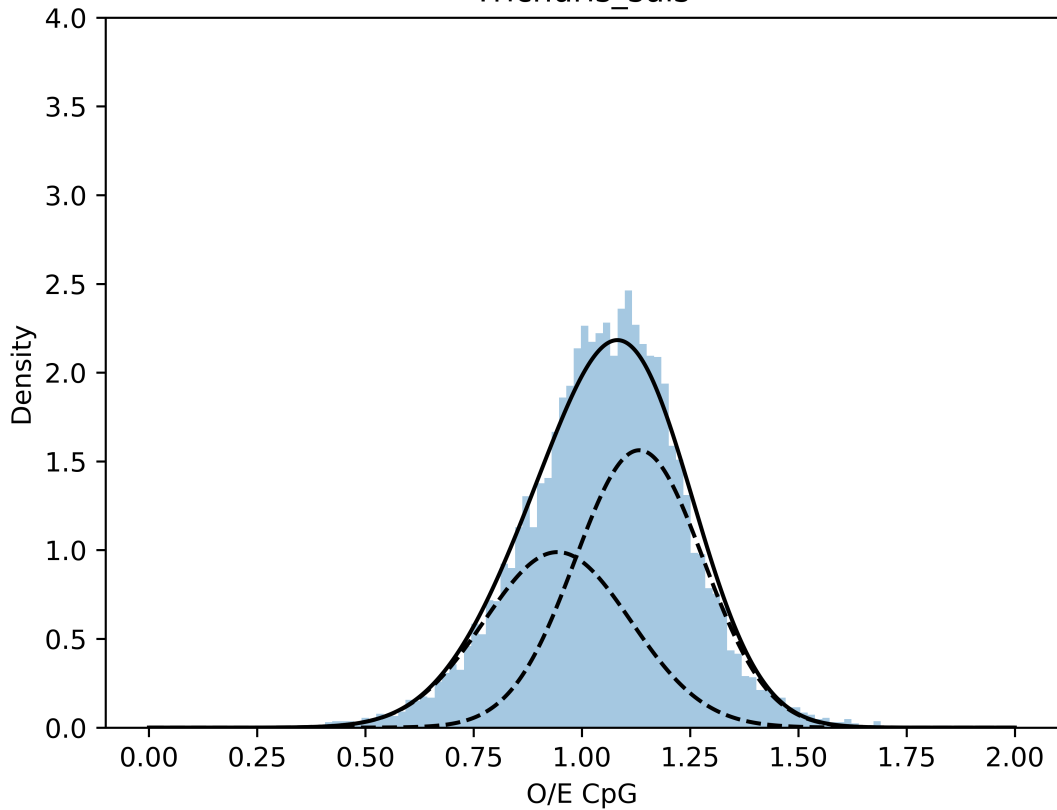

# Trichuris\_trichiura

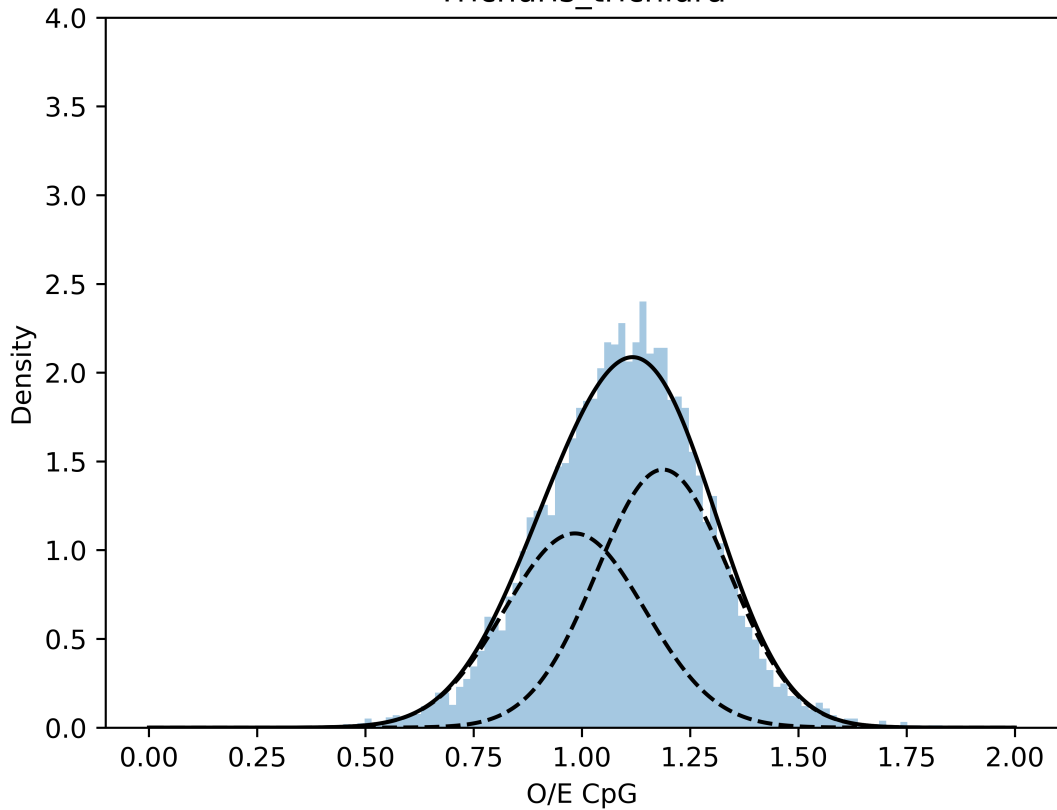

# Soboliphyme\_baturini

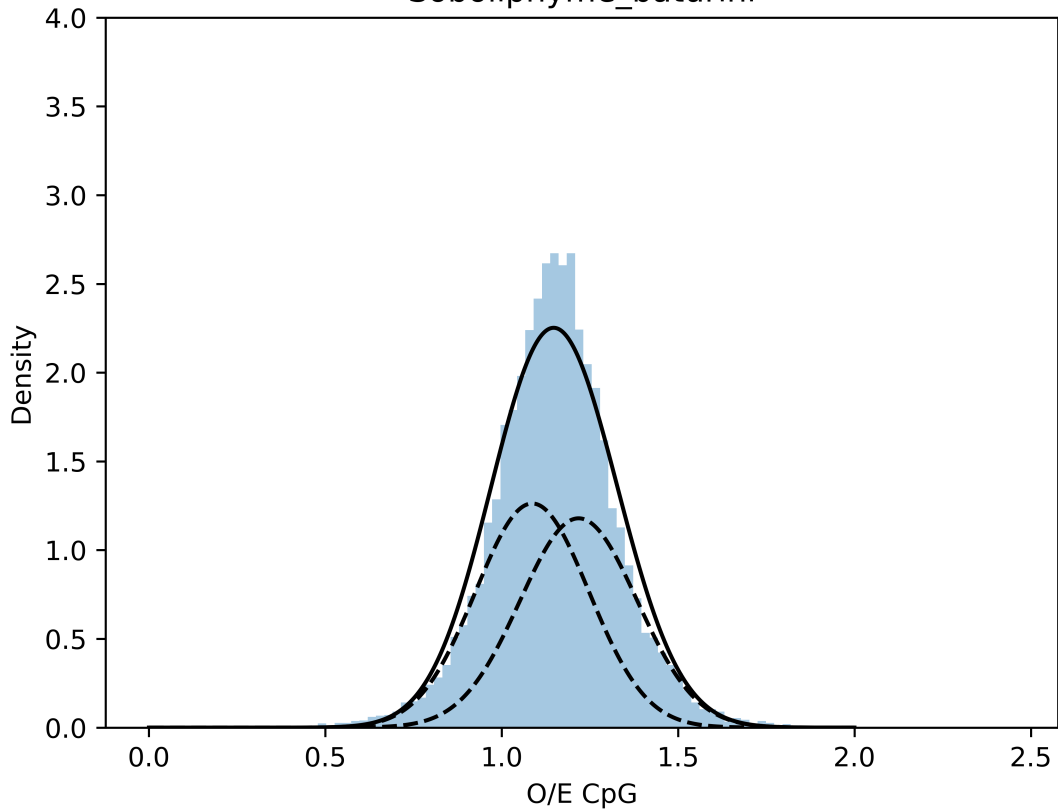



# Priapulus\_caudatus

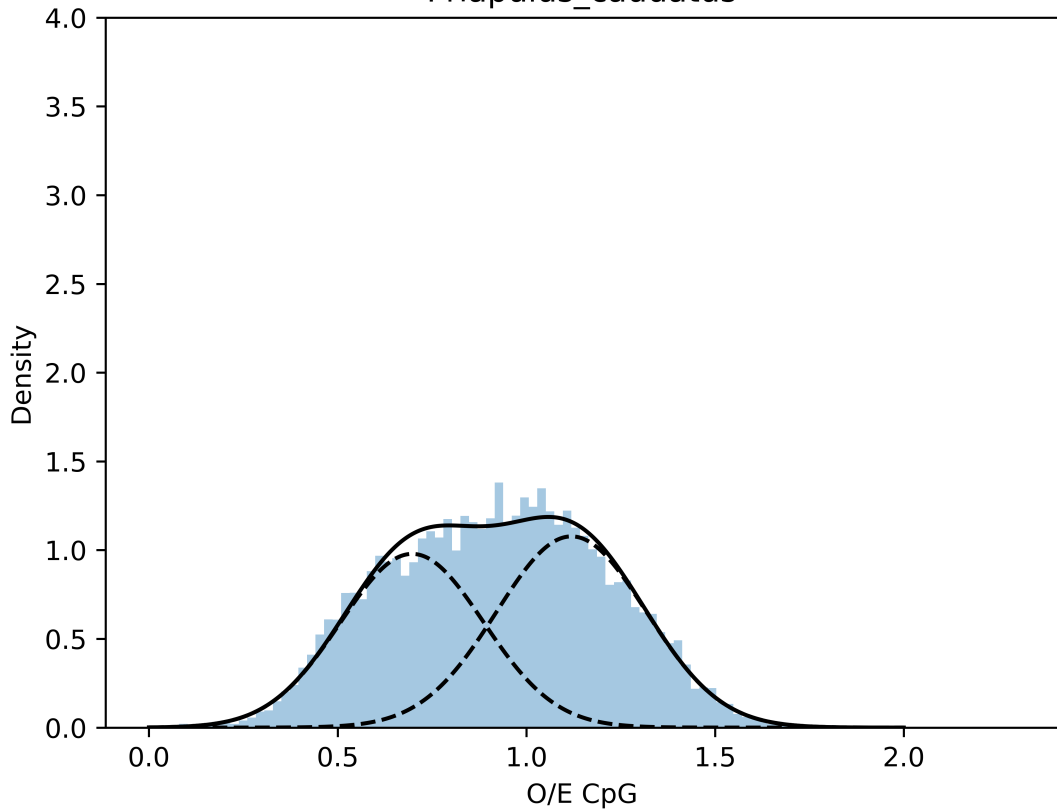

# Hydra\_vulgaris

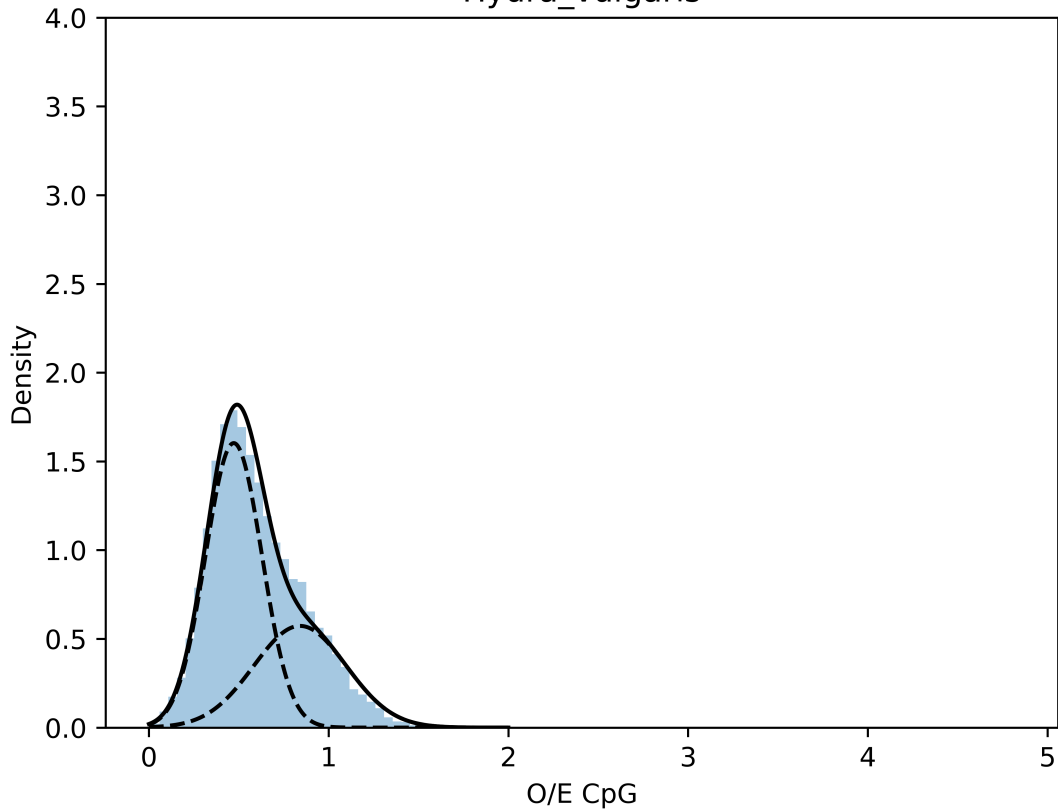

# Nematostella\_vectensis

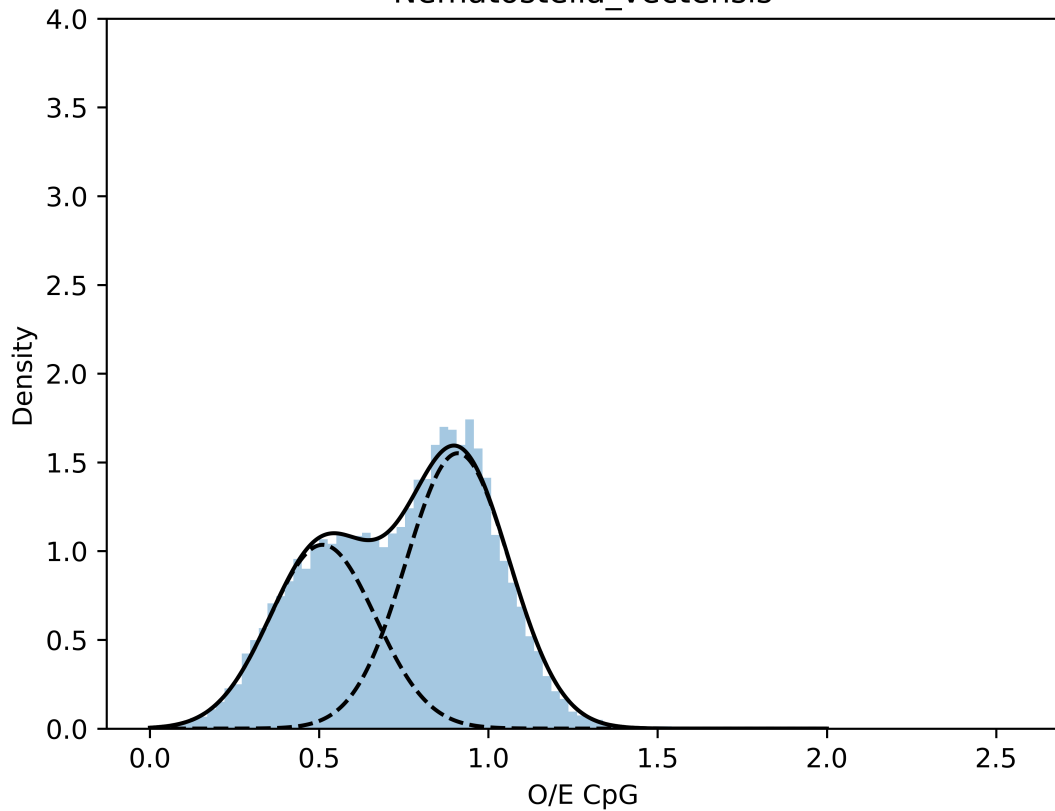

# Trichoplax\_adhaerens

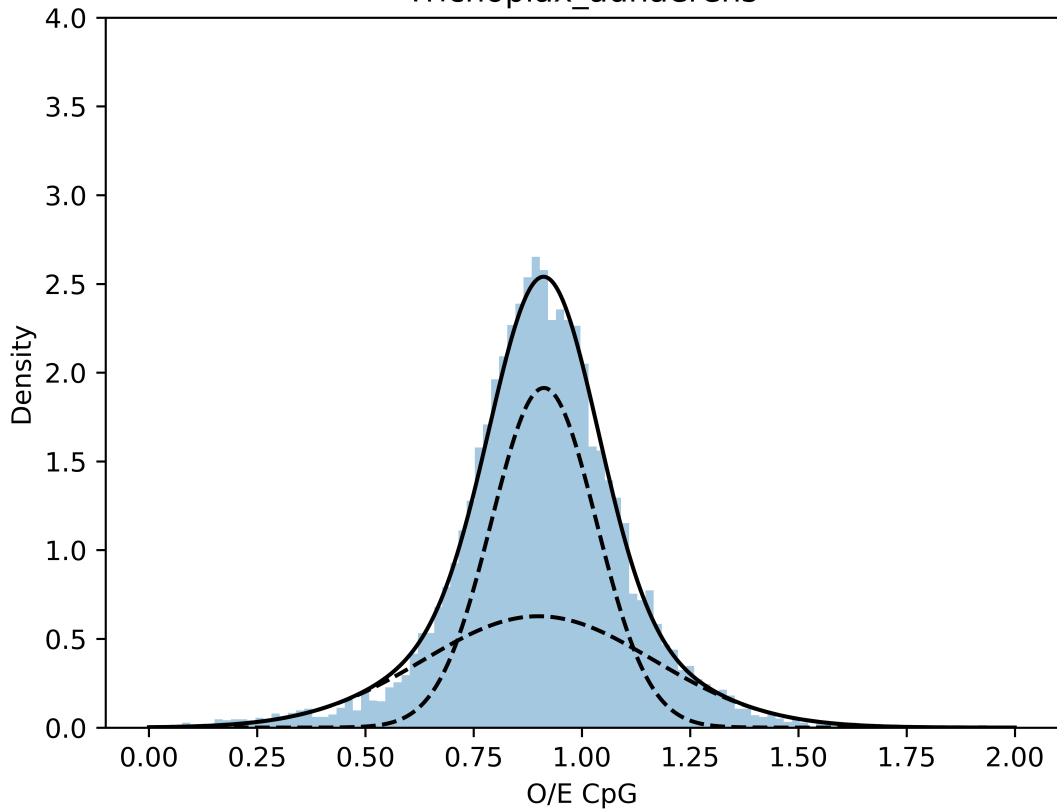

# Trichoplax\_H2

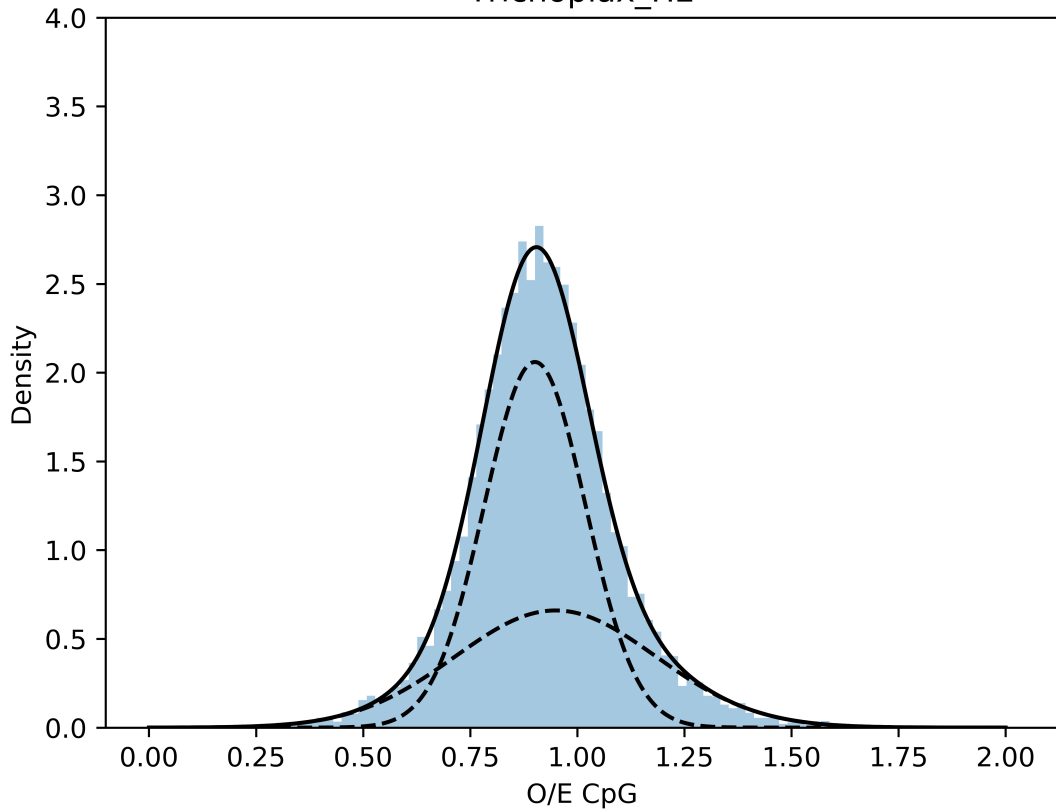

# Amphimedon\_queenslandica

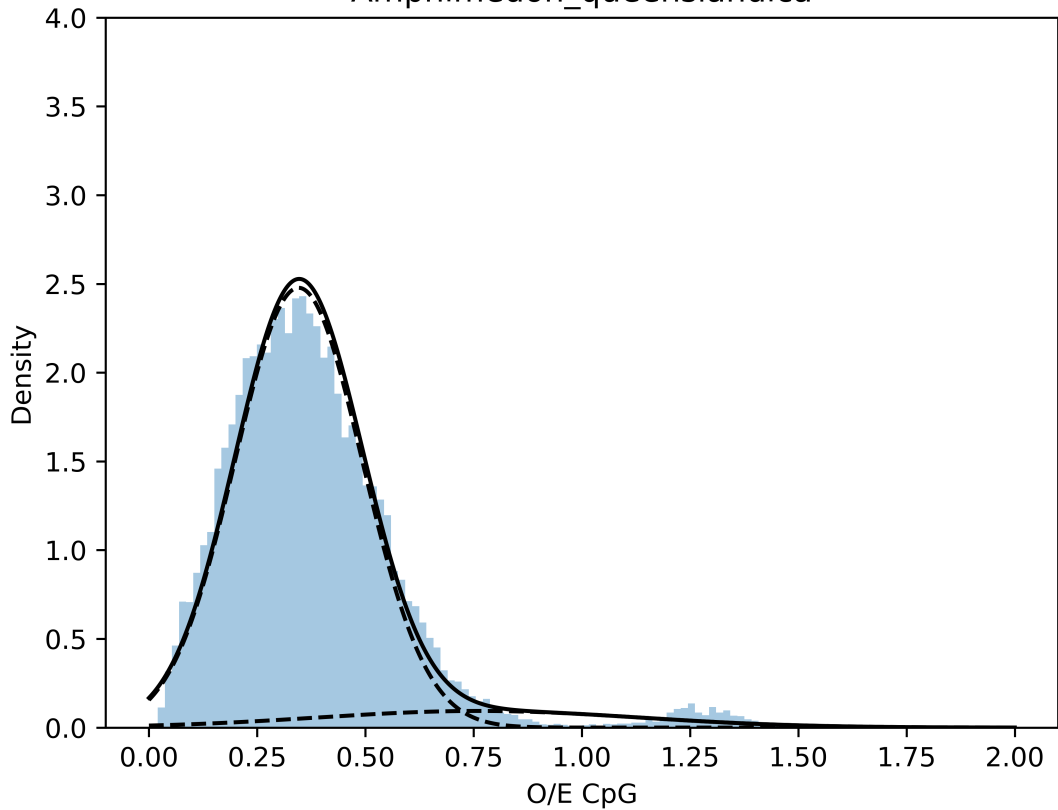

Supplement: 239_2021_10042_MOESM1_ESM.pdf [file 239_2021_10042_MOESM1_ESM.pdf]
